# Supplementary material for: COVID-19 in Pregnant Women and Neonates: A Systematic Review of the Literature with Quality Assessment of the Studies
Source: PubMed Central journal article supplement (PMC7350364; doi:10.3390/pathogens9060485), 2020-06-18
Supplement: pathogens-09-00485-s001.pdf [file pathogens-09-00485-s001.pdf]

**Supplemental material: PRISMA Checklist**

| Section/topic                      | #  | Checklist item                                                                                                                                                                                                                                                                                              | Reported on page # |
|------------------------------------|----|-------------------------------------------------------------------------------------------------------------------------------------------------------------------------------------------------------------------------------------------------------------------------------------------------------------|--------------------|
| <b>TITLE</b>                       |    |                                                                                                                                                                                                                                                                                                             |                    |
| Title                              | 1  | Identify the report as a systematic review, meta-analysis, or both.                                                                                                                                                                                                                                         | 1                  |
| <b>ABSTRACT</b>                    |    |                                                                                                                                                                                                                                                                                                             |                    |
| Structured summary                 | 2  | Provide a structured summary including, as applicable: background; objectives; data sources; study eligibility criteria, participants, and interventions; study appraisal and synthesis methods; results; limitations; conclusions and implications of key findings; systematic review registration number. | 1                  |
| <b>INTRODUCTION</b>                |    |                                                                                                                                                                                                                                                                                                             |                    |
| Rationale                          | 3  | Describe the rationale for the review in the context of what is already known.                                                                                                                                                                                                                              | 1-2                |
| Objectives                         | 4  | Provide an explicit statement of questions being addressed with reference to participants, interventions, comparisons, outcomes, and study design (PICOS).                                                                                                                                                  | 1-2                |
| <b>METHODS</b>                     |    |                                                                                                                                                                                                                                                                                                             |                    |
| Protocol and registration          | 5  | Indicate if a review protocol exists, if and where it can be accessed (e.g., Web address), and, if available, provide registration information including registration number.                                                                                                                               | NA                 |
| Eligibility criteria               | 6  | Specify study characteristics (e.g., PICOS, length of follow-up) and report characteristics (e.g., years considered, language, publication status) used as criteria for eligibility, giving rationale.                                                                                                      | 3                  |
| Information sources                | 7  | Describe all information sources (e.g., databases with dates of coverage, contact with study authors to identify additional studies) in the search and date last searched.                                                                                                                                  | 2                  |
| Search                             | 8  | Present full electronic search strategy for at least one database, including any limits used, such that it could be repeated.                                                                                                                                                                               | 2                  |
| Study selection                    | 9  | State the process for selecting studies (i.e., screening, eligibility, included in systematic review, and, if applicable, included in the meta-analysis).                                                                                                                                                   | 3                  |
| Data collection process            | 10 | Describe method of data extraction from reports (e.g., piloted forms, independently, in duplicate) and any processes for obtaining and confirming data from investigators.                                                                                                                                  | 3                  |
| Data items                         | 11 | List and define all variables for which data were sought (e.g., PICOS, funding sources) and any assumptions and simplifications made.                                                                                                                                                                       | 3                  |
| Risk of bias in individual studies | 12 | Describe methods used for assessing risk of bias of individual studies (including specification of whether this was done at the study or outcome level), and how this information is to be used in any data synthesis.                                                                                      | 3                  |
| Summary measures                   | 13 | State the principal summary measures (e.g., risk ratio, difference in means).                                                                                                                                                                                                                               | NA                 |
| Synthesis of results               | 14 | Describe the methods of handling data and combining results of studies, if done, including measures of consistency (e.g., $I^2$ ) for each meta-analysis.                                                                                                                                                   | 3                  |
| Section/topic                      | #  | Checklist item                                                                                                                                                                                                                                                                                              | Reported on page # |
| Risk of bias across studies        | 15 | Specify any assessment of risk of bias that may affect the cumulative evidence (e.g., publication bias, selective reporting within studies).                                                                                                                                                                | NA                 |
| Additional analyses                | 16 | Describe methods of additional analyses (e.g., sensitivity or subgroup analyses, meta-regression), if done, indicating which were pre-specified.                                                                                                                                                            | NA                 |
| <b>RESULTS</b>                     |    |                                                                                                                                                                                                                                                                                                             |                    |

|                               |    |                                                                                                                                                                                                          |       |
|-------------------------------|----|----------------------------------------------------------------------------------------------------------------------------------------------------------------------------------------------------------|-------|
| Study selection               | 17 | Give numbers of studies screened, assessed for eligibility, and included in the review, with reasons for exclusions at each stage, ideally with a flow diagram.                                          | 5     |
| Study characteristics         | 18 | For each study, present characteristics for which data were extracted (e.g., study size, PICOS, follow-up period) and provide the citations.                                                             | 5-12  |
| Risk of bias within studies   | 19 | Present data on risk of bias of each study and, if available, any outcome level assessment (see item 12).                                                                                                | 12-14 |
| Results of individual studies | 20 | For all outcomes considered (benefits or harms), present, for each study: (a) simple summary data for each intervention group (b) effect estimates and confidence intervals, ideally with a forest plot. | 14-23 |
| Synthesis of results          | 21 | Present results of each meta-analysis done, including confidence intervals and measures of consistency.                                                                                                  | NA    |
| Risk of bias across studies   | 22 | Present results of any assessment of risk of bias across studies (see Item 15).                                                                                                                          | NA    |
| Additional analysis           | 23 | Give results of additional analyses, if done (e.g., sensitivity or subgroup analyses, meta-regression [see Item 16]).                                                                                    | NA    |
| <b>DISCUSSION</b>             |    |                                                                                                                                                                                                          |       |
| Summary of evidence           | 24 | Summarize the main findings including the strength of evidence for each main outcome; consider their relevance to key groups (e.g., healthcare providers, users, and policy makers).                     | 23-25 |
| Limitations                   | 25 | Discuss limitations at study and outcome level (e.g., risk of bias), and at review-level (e.g., incomplete retrieval of identified research, reporting bias).                                            | 25    |
| Conclusions                   | 26 | Provide a general interpretation of the results in the context of other evidence, and implications for future research.                                                                                  | 25    |
| <b>FUNDING</b>                |    |                                                                                                                                                                                                          |       |
| Funding                       | 27 | Describe sources of funding for the systematic review and other support (e.g., supply of data); role of funders for the systematic review.                                                               | 26    |

## Supplemental material. Search strategy

### 1. Search strategy for EMBASE

|                                          |                                                                                                                                                                                                                                                                                                                                                                                                                                                                                                                                           |
|------------------------------------------|-------------------------------------------------------------------------------------------------------------------------------------------------------------------------------------------------------------------------------------------------------------------------------------------------------------------------------------------------------------------------------------------------------------------------------------------------------------------------------------------------------------------------------------------|
| <b>Search query</b>                      | ('covid-19' OR 'severe acute respiratory syndrome coronavirus 2'/exp OR 'severe acute respiratory syndrome coronavirus 2' OR '2019-ncov' OR 'sars-cov-2' OR '2019ncov' OR '2019 coronavirus disease' OR ('wuhan' AND ('coronavirus'/exp OR 'coronavirus'))) AND [1-12-2019]/sd AND (child* OR pediatri* OR paediatric* OR infan* OR newborn* OR neonate* OR pregnan* OR breastfeed* OR fetal OR fetus OR obstetric* OR 'transplacental transmission' OR 'placental transmission' OR 'vertical transmission' OR intrauterine OR perinatal) |
| <b>Records without duplicates</b>        | 65                                                                                                                                                                                                                                                                                                                                                                                                                                                                                                                                        |
| <b>Records after title screening</b>     | 38 (27 excluded)                                                                                                                                                                                                                                                                                                                                                                                                                                                                                                                          |
| <b>Records after abstract screening</b>  | 9 (29 excluded)                                                                                                                                                                                                                                                                                                                                                                                                                                                                                                                           |
| <b>Records after full text screening</b> | 1 (8 excluded)                                                                                                                                                                                                                                                                                                                                                                                                                                                                                                                            |

|                            |                                     |
|----------------------------|-------------------------------------|
| <b>Exclusion criteria:</b> | 23 No appropriate outcome           |
|                            | 27 No appropriate population sample |
|                            | 13 No original article              |
|                            | 1 No useful data                    |

| <b>Records</b>                                                                                                                                                                                                                                       | <b>Exclusion criteria</b>        |
|------------------------------------------------------------------------------------------------------------------------------------------------------------------------------------------------------------------------------------------------------|----------------------------------|
| Chen, Z., et al., Diagnosis and treatment recommendation for pediatric coronavirus disease-19. Zhejiang da xue xue bao. Yi xue ban = Journal of Zhejiang University. Medical sciences, 2020. 49(1): p. 1-8.                                          | No original article              |
| Çiftçi, E. and F. Çoksüer, Novel coronavirus infection: Covid-19. Flora, 2020. 25(1): p. 9-18.                                                                                                                                                       | No appropriate outcome           |
| Ghosh, A., R. Gupta, and A. Misra, Telemedicine for diabetes care in India during COVID19 pandemic and national lockdown period: Guidelines for physicians. Diabetes and Metabolic Syndrome: Clinical Research and Reviews, 2020. 14(4): p. 273-276. | No appropriate population sample |
| Grant, W.B., et al., Evidence that vitamin d supplementation could reduce risk of influenza and covid-19 infections and deaths. Nutrients, 2020. 12(4).                                                                                              | No appropriate outcome           |
| Hall, K.S., et al., Centring sexual and reproductive health and justice in the global COVID-19 response. The Lancet, 2020. 395(10231): p. 1175-1177.                                                                                                 | No appropriate outcome           |
| Haşlak, F., et al., Childhood Rheumatic Diseases and COVID-19 Pandemic: An Intriguing Linkage and a New Horizon. Balkan medical journal, 2020.                                                                                                       | No appropriate population sample |

|                                                                                                                                                                                                                                      |                                  |
|--------------------------------------------------------------------------------------------------------------------------------------------------------------------------------------------------------------------------------------|----------------------------------|
| Hedrich, C.M., COVID-19 – Considerations for the paediatric rheumatologist. <i>Clinical Immunology</i> , 2020. 214.                                                                                                                  | No original article              |
| Huang, J.W., et al., Dialectical behavior therapy-based psychological intervention for woman in late pregnancy and early postpartum suffering from COVID-19: a case report. <i>Journal of Zhejiang University: Science B</i> , 2020. | No appropriate outcome           |
| Hussein, J., COVID-19: What implications for sexual and reproductive health and rights globally? <i>Sexual and Reproductive Health Matters</i> , 2020. 28(1).                                                                        | No appropriate outcome           |
| Jones, V.G., et al., COVID-19 and Kawasaki Disease: Novel Virus and Novel Case. <i>Hospital pediatrics</i> , 2020.                                                                                                                   | No appropriate population sample |
| Kimberlin, D.W. and S. Stagno, Can SARS-CoV-2 Infection Be Acquired in Utero?: More Definitive Evidence Is Needed. <i>JAMA - Journal of the American Medical Association</i> , 2020: p. E1-E2.                                       | No original article              |
| Lenert, L. and B.Y. McSwain, Balancing Health Privacy, Health Information Exchange and Research in the Context of the COVID-19 Pandemic. <i>Journal of the American Medical Informatics Association : JAMIA</i> , 2020.              | No appropriate outcome           |
| Liew, M.F., et al., Preparing for CovID-19: Early experience from an intensive care unit in Singapore. <i>Critical Care</i> , 2020. 24(1).                                                                                           | No appropriate population sample |
| Parhar, K.K.S., et al., Optimizing provision of extracorporeal life support during the COVID-19 pandemic: Practical considerations for Canadian jurisdictions. <i>CMAJ</i> , 2020. 192(14): p. E372-E374.                            | No appropriate outcome           |
| Rajkumar, R.P., COVID-19 and mental health: A review of the existing literature. <i>Asian Journal of Psychiatry</i> , 2020. 52.                                                                                                      | No original article              |

|                                                                                                                                                                                                                                 |                                  |
|---------------------------------------------------------------------------------------------------------------------------------------------------------------------------------------------------------------------------------|----------------------------------|
| Sheng, W.H., et al., SARS-CoV-2 and COVID-19. <i>Journal of Microbiology, Immunology and Infection</i> , 2020.                                                                                                                  | No appropriate outcome           |
| The, L., The gendered dimensions of COVID-19. <i>The Lancet</i> , 2020. 395(10231): p. 1168.                                                                                                                                    | No appropriate outcome           |
| Wei-ming, Y., et al., Expression of prothrombinase/fibrinolytic gene fg12 in lung impairment in a murine severe acute respiratory syndrome model. <i>Virologica Sinica</i> , 2007. 22(3): p. 181-192.                           | No appropriate outcome           |
| Xu, Y.H., et al., Clinical and computed tomographic imaging features of novel coronavirus pneumonia caused by SARS-CoV-2. <i>Journal of Infection</i> , 2020. 80(4): p. 394-400.                                                | No appropriate population sample |
| Zhang, S., et al., The novel coronavirus (SARS-CoV-2) infections in China: prevention, control and challenges. <i>Intensive Care Medicine</i> , 2020. 46(4): p. 591-593.                                                        | No appropriate outcome           |
| Zhao, W., et al., CT scans of patients with 2019 novel coronavirus (COVID-19) pneumonia. <i>Theranostics</i> , 2020. 10(10): p. 4606-4613.                                                                                      | No appropriate population sample |
| Zhou, W.H., Perinatal and neonatal management plan for prevention and control of 2019 novel coronavirus infection (1st Edition). <i>Chinese Journal of Contemporary Pediatrics</i> , 2020. 22(2): p. 87-90.                     | No original article              |
| Zhu, Y.L., B.B. Yang, and F. Wu, Understanding of COVID-19 in children from different perspectives of traditional Chinese medicine and western medicine. <i>Chinese Traditional and Herbal Drugs</i> , 2020. 51(4): p. 883-887. | No appropriate outcome           |
| Perinatal and neonatal management plan for prevention and control of SARS-CoV-2 infection (2nd Edition). <i>Zhongguo dang dai er ke za zhi = Chinese journal of contemporary pediatrics</i> , 2020. 22(3): p. 195-198.          | No original article              |

|                                                                                                                                                                                                                                                              |                                  |
|--------------------------------------------------------------------------------------------------------------------------------------------------------------------------------------------------------------------------------------------------------------|----------------------------------|
| Alhazzani, W., et al., Surviving Sepsis Campaign: guidelines on the management of critically ill adults with Coronavirus Disease 2019 (COVID-19). <i>Intensive care medicine</i> , 2020.                                                                     | No original article              |
| Alonso Díaz, C., et al., First case of neonatal infection due to SARS-CoV-2 in Spain. <i>Anales de pediatría (Barcelona, Spain : 2003)</i> , 2020.                                                                                                           | Included                         |
| Li, S., et al., The impact of covid-19 epidemic declaration on psychological consequences: A study on active weibo users. <i>International Journal of Environmental Research and Public Health</i> , 2020. 17(6).                                            | No appropriate outcome           |
| Li, Y., et al., Follow-up testing of viral nucleic acid in discharged patients with moderate type of 2019 coronavirus disease (COVID-19). <i>Zhejiang da xue xue bao. Yi xue ban = Journal of Zhejiang University. Medical sciences</i> , 2020. 49(1): p. 0. | No appropriate population sample |
| Pan, X., et al., Asymptomatic cases in a family cluster with SARS-CoV-2 infection. <i>The Lancet Infectious Diseases</i> , 2020. 20(4): p. 410-411.                                                                                                          | No appropriate population sample |
| Pung, R., et al., Investigation of three clusters of COVID-19 in Singapore: implications for surveillance and response measures. <i>The Lancet</i> , 2020. 395(10229): p. 1039-1046.                                                                         | No appropriate population sample |
| Shi, Y., et al., A quickly, effectively screening process of novel corona virus disease 2019 (COVID-19) in children in Shanghai, China. <i>Annals of Translational Medicine</i> , 2020. 8(5).                                                                | No appropriate population sample |
| Tian, S., et al., Characteristics of COVID-19 infection in Beijing. <i>Journal of Infection</i> , 2020. 80(4): p. 401-406.                                                                                                                                   | No appropriate population sample |
| Wang, Y., et al., Oral Health Management of Children during the Epidemic Period of Coronavirus Disease 2019. <i>Sichuan da xue xue bao. Yi xue ban = Journal of Sichuan University. Medical science edition</i> , 2020. 51(2): p. 151-154.                   | No appropriate population sample |

|                                                                                                                                                                                                                                                                   |                                  |
|-------------------------------------------------------------------------------------------------------------------------------------------------------------------------------------------------------------------------------------------------------------------|----------------------------------|
| Wollenberg, A., et al., European Task Force on Atopic Dermatitis (ETFAD) statement on severe acute respiratory syndrome coronavirus 2 (SARS-Cov-2)-infection and atopic dermatitis. Journal of the European Academy of Dermatology and Venereology : JEADV, 2020. | No appropriate outcome           |
| Yang, C., Does hand hygiene reduce SARS-CoV-2 transmission? Graefe's archive for clinical and experimental ophthalmology = Albrecht von Graefes Archiv fur klinische und experimentelle Ophthalmologie, 2020.                                                     | No appropriate population sample |
| Zehender, G., et al., GENOMIC CHARACTERISATION AND PHYLOGENETIC ANALYSIS OF SARS-COV-2 IN ITALY. Journal of medical virology, 2020.                                                                                                                               | No appropriate outcome           |
| Erratum: Department of Error (The Lancet (2020) 395(10226) (809–815), (S0140673620303603), (10.1016/S0140-6736(20)30360-3)). The Lancet, 2020. 395(10229): p. 1038.                                                                                               | No original article              |
| Chen, Z., et al., High-resolution computed tomography manifestations of COVID-19 infections in patients of different ages. European Journal of Radiology, 2020. 126.                                                                                              | No appropriate population sample |
| Gan, H., et al., Epidemiological analysis on 1 052 cases of COVID-19 in epidemic clusters. Zhonghua liu xing bing xue za zhi = Zhonghua liuxingbingxue zazhi, 2020. 41(5): p. E027.                                                                               | No appropriate population sample |
| Huang, J., et al., Recommendation about the perioperative prevention of infection to healthcare workers and the anesthesia management of children with SARS-CoV-2 infection. World Journal of Pediatric Surgery, 2020. 3(1).                                      | No appropriate population sample |
| Kang, X., et al., Anesthesia management in cesarean section for a patient with coronavirus disease 2019. Zhejiang da xue xue bao. Yi xue ban = Journal of Zhejiang University. Medical sciences, 2020. 49(1): p. 0.                                               | No useful data                   |
| Kinner, S.A., et al., Prisons and custodial settings are part of a comprehensive response to COVID-19. The Lancet Public Health, 2020. 5(4): p. e188-e189.                                                                                                        | No appropriate population sample |

|                                                                                                                                                                                                                                                                                            |                                         |
|--------------------------------------------------------------------------------------------------------------------------------------------------------------------------------------------------------------------------------------------------------------------------------------------|-----------------------------------------|
| <p>Sun, Q., et al., Lower mortality of COVID-19 by early recognition and intervention: experience from Jiangsu Province. <i>Annals of Intensive Care</i>, 2020. 10(1).</p>                                                                                                                 | <p>No appropriate population sample</p> |
| <p>Xie, C., et al., Comparison of different samples for 2019 novel coronavirus detection by nucleic acid amplification tests. <i>International Journal of Infectious Diseases</i>, 2020. 93: p. 264-267.</p>                                                                               | <p>No appropriate population sample</p> |
| <p>Zhang, Y.H., et al., 2019 novel coronavirus infection in a three-month-old baby. <i>Zhonghua er ke za zhi = Chinese journal of pediatrics</i>, 2020. 58(3): p. 182-184.</p>                                                                                                             | <p>No appropriate population sample</p> |
| <p>Zhang, Y., et al., Clinical and coagulation characteristics of 7 patients with critical COVID-2019 pneumonia and acro-ischemia. <i>Zhonghua xue ye xue za zhi = Zhonghua xueyexue zazhi</i>, 2020. 41: p. E006.</p>                                                                     | <p>No appropriate population sample</p> |
| <p>Zhou, Y., et al., Clinical features and chest CT findings of coronavirus disease 2019 in infants and young children. <i>Zhongguo dang dai er ke za zhi = Chinese journal of contemporary pediatrics</i>, 2020. 22(3): p. 215-220.</p>                                                   | <p>No appropriate population sample</p> |
| <p>Liu K.-C., Xu P., Lv W.-F., Qiu X.-H., Yao J.-L., Gu J.-F., Wei W. CT manifestations of coronavirus disease-2019: A retrospective analysis of 73 cases by disease severity. <i>European Journal of Radiology</i> (2020) 126 Article Number: 108941. Date of Publication: 1 May 2020</p> | <p>No appropriate population sample</p> |
| <p>Lupia T., Scabini S., Pinna S.M., Di Perri G., De Rosa F.G., Corcione S. 2019-novel coronavirus outbreak: A new challenge. <i>Journal of global antimicrobial resistance</i> (2020). Date of Publication: 7 Mar 2020</p>                                                                | <p>No original article</p>              |
| <p>Fan Q., Pan Y., Wu Q., Liu S., Song X., Xie Z., Liu Y., Zhao L., Wang Z., Zhang Y., Wu Z., Guan L., Lv X. Anal swab findings in an infant with COVID-19. <i>Pediatric Investigation</i> (2020) 4:1 (48-50). Date of Publication: 1 Mar 2020</p>                                         | <p>No appropriate population sample</p> |
| <p>Xie Z. Pay attention to SARS-CoV-2 infection in children. <i>Pediatric Investigation</i> (2020) 4:1 (1-4). Date of Publication: 1 Mar 2020</p>                                                                                                                                          | <p>No original article</p>              |



|                                                                                                                                                                                                                                                                                                                           |                                  |
|---------------------------------------------------------------------------------------------------------------------------------------------------------------------------------------------------------------------------------------------------------------------------------------------------------------------------|----------------------------------|
| Palacios Cruz M., Santos E., Velázquez Cervantes M.A., León Juárez M. COVID-19, a worldwide public health emergency. COVID-19, una emergencia de salud pública mundial.                                                                                                                                                   | No appropriate outcome           |
| Wu M., Zhang Q., Yi D., Wu T., Chen H., Guo S., Li S., , Wang L., Zhao D., Hou Y., Wu G. Quantitative Proteomic Analysis Reveals Antiviral and Anti-inflammatory Effects of Puerarin in Piglets. Infected With Porcine Epidemic Diarrhea Virus. <i>Frontiers in immunology</i> (2020) 11 (169). Date of Publication: 2020 | No appropriate outcome           |
| Ko W.-C., Rolain J.-M., Lee N.-Y., Chen P.-L., Huang C.-T., Lee P.-I., Hsueh P.-R. Arguments in favor of remdesivir for treating SARS-CoV-2 infections. <i>International journal of antimicrobial agents</i> (2020) (105933). Date of Publication: 5 Mar 2020                                                             | No appropriate outcome           |
| Chua M.S.Q., Lee J.C.S., Sulaiman S., Tan H.K. From the frontlines of COVID-19 - How prepared are we as obstetricians: a commentary. <i>BJOG : an international journal of obstetrics and gynaecology</i> (2020). Date of Publication: 4 Mar 2020                                                                         | No original article              |
| Yang P., Liu P., Li D., Zhao D. Corona Virus Disease 2019, a growing threat to children? <i>The Journal of infection</i> (2020). Date of Publication: 3 Mar 2020                                                                                                                                                          | No original article              |
| Zhang J., Zhou L., Yang Y., Peng W., Wang W., Chen X. Therapeutic and triage strategies for 2019 novel coronavirus disease in fever clinics. <i>The Lancet Respiratory Medicine</i> (2020) 8:3 (e11-e12). Date of Publication: 1 Mar 2020                                                                                 | No appropriate population sample |
| Xu X., Chen P., Wang J., Feng J., Zhou H., Li X., Zhong W., Hao P. Evolution of the novel coronavirus from the ongoing Wuhan outbreak and modeling of its spike protein for risk of human transmission. <i>Science China. Life sciences</i> (2020) 63:3 (457-460). Date of Publication: 1 Mar 2020                        | No appropriate outcome           |
| Calda P., Břešťák M., Fischerová D., Zikán M., Smetanová D., Machala L. Coronavirus infection and pregnancy (Covid-19) Koronavirová infekce a těhotenství (Covid-19). <i>Aktualni Gynekologie a Porodnictvi</i> (2020) 12 (17-19). Date of Publication: 2020                                                              | No original article              |
| Chen W.-H., Strych U., Hotez P.J., Bottazzi M.E. The SARS-CoV-2 Vaccine Pipeline: an Overview. <i>Current Tropical Medicine Reports</i> (2020). Date of Publication: 2020                                                                                                                                                 | No appropriate outcome           |

|                                                                                                                                                                                                                                                                                                                                                                                                        |                                  |
|--------------------------------------------------------------------------------------------------------------------------------------------------------------------------------------------------------------------------------------------------------------------------------------------------------------------------------------------------------------------------------------------------------|----------------------------------|
| Gilbert M., Pullano G., Pinotti F., Valdano E., Poletto C., Boëlle P.-Y., D'Ortenzio E., Yazdanpanah Y., Eholie S.P., Altmann M., Gutierrez B., Kraemer M.U.G., Colizza V. Preparedness and vulnerability of African countries against importations of COVID-19: a modelling study. <i>The Lancet</i> (2020). Date of Publication: 2020                                                                | No appropriate outcome           |
| Sun K., Chen J., Viboud C. Early epidemiological analysis of the coronavirus disease 2019 outbreak based on crowdsourced data: a population-level observational study. <i>The Lancet Digital Health</i> (2020). Date of Publication: 2020                                                                                                                                                              | No appropriate outcome           |
| Mizumoto K., Chowell G. Transmission potential of the novel coronavirus (COVID-19) onboard the diamond Princess Cruises Ship, 2020. <i>Infectious Disease Modelling</i> (2020) 5 (264-270). Date of Publication: 1 Jan 2020                                                                                                                                                                            | No appropriate population sample |
| Rodriguez-Morales A.J., Gallego V., Escalera-Antezana J.P., Méndez C.A., Zambrano L.I., Franco-Paredes C., Suárez J.A., Rodriguez-Enciso H.D., Balbin-Ramon G.J., Savio-Larriera E., Risquez A., Cimerman S. COVID-19 in Latin America: The implications of the first confirmed case in Brazil. <i>Travel Medicine and Infectious Disease</i> (2020) Article Number: 101613. Date of Publication: 2020 | No appropriate population sample |
| Qian S., Zhang W., Jia X., Sun Z., Zhang Y., Xiao Y., Li Z. Isolation and Identification of Porcine Epidemic Diarrhea Virus and Its Effect on Host Natural Immune Response. <i>Frontiers in Microbiology</i> (2019) 10 Article Number: 2272. Date of Publication: 4 Oct 2019                                                                                                                           | No appropriate outcome           |

## 2. Search strategy for MEDLINE

|                                   |                                                                                                                                                                                                                                                                                                                                                                                                                                                                                                                                                                                                                                                                       |
|-----------------------------------|-----------------------------------------------------------------------------------------------------------------------------------------------------------------------------------------------------------------------------------------------------------------------------------------------------------------------------------------------------------------------------------------------------------------------------------------------------------------------------------------------------------------------------------------------------------------------------------------------------------------------------------------------------------------------|
| <b>Search query</b>               | ("COVID-19"[All Fields] OR "severe acute respiratory syndrome coronavirus 2"[Supplementary Concept] OR "severe acute respiratory syndrome coronavirus 2"[All Fields] OR "2019-nCoV"[All Fields] OR "SARS-CoV-2"[All Fields] OR "2019nCoV"[All Fields] OR "2019 coronavirus disease" OR (("Wuhan"[All Fields] AND ("coronavirus"[MeSH Terms] OR "coronavirus"[All Fields])) AND 2019/12[PDAT] : 2030[PDAT])) AND (child* OR pediatri* OR paediatri* OR infan* OR newborn* OR neonate* OR pregnan* OR breastfeed* OR fetal OR fetus OR obstetric* OR "transplacental transmission" OR "placental transmission" OR "vertical transmission" OR intrauterine OR perinatal) |
| <b>Records without duplicates</b> | 635                                                                                                                                                                                                                                                                                                                                                                                                                                                                                                                                                                                                                                                                   |
| <b>Title screening</b>            | 342 (293 excluded)                                                                                                                                                                                                                                                                                                                                                                                                                                                                                                                                                                                                                                                    |

|                            |                                      |
|----------------------------|--------------------------------------|
| <b>Abstract screening</b>  | 74 (268 excluded)                    |
| <b>Full text screening</b> | 33 (41 excluded)                     |
| <b>Exclusion criteria</b>  | 229 No appropriate outcome           |
|                            | 227 No appropriate population sample |
|                            | 133 No original article              |
|                            | 4 No useful data                     |
|                            | 9 Overlapping data                   |

| <b>Records</b>                                                                                                                                                                                                                                                                                                                                                                                             | <b>Exclusion criteria</b>        |
|------------------------------------------------------------------------------------------------------------------------------------------------------------------------------------------------------------------------------------------------------------------------------------------------------------------------------------------------------------------------------------------------------------|----------------------------------|
| 1: Dotters-Katz SK, Hughes BL. Considerations for Obstetric Care during the COVID-19 Pandemic. Am J Perinatol. 2020 Apr 17. doi: 10.1055/s-0040-1710051. [Epub ahead of print] PubMed PMID: 32303077.                                                                                                                                                                                                      | No original article              |
| 2: Weiner HL, Adelson PD, Brockmeyer DL, Maher CO, Gupta N, Smyth MD, Jea A, Blount JP, Riva-Cambrin J, Lam SK, Ahn ES, Albert GW, Leonard JR. Editorial. Pediatric neurosurgery along with Children's Hospitals' innovations are rapid and uniform in response to the COVID-19 pandemic. J Neurosurg Pediatr. 2020 Apr 17:1-3. doi: 10.3171/2020.4.PEDS20240. [Epub ahead of print] PubMed PMID: 32302988 | No appropriate population sample |
| 3: Arlt W, Dekkers OM, Leger J, Semple RK. Endocrinology in the time of COVID-19. Eur J Endocrinol. 2020 Apr 1. pii: EJE-20-0386. doi: 10.1530/EJE-20-0386. [Epub ahead of print] Review. PubMed PMID: 32302976.                                                                                                                                                                                           | No appropriate population sample |
| 4: Yang P, Wang X, Liu P, Wei C, He B, Zheng J, Zhao D. Clinical characteristics and risk assessment of newborns born to mothers with COVID-19. J Clin Virol. 2020 Apr 10;127:104356. doi: 10.1016/j.jcv.2020.104356.                                                                                                                                                                                      | Included                         |

|                                                                                                                                                                                                                                                                                                                                            |                                  |
|--------------------------------------------------------------------------------------------------------------------------------------------------------------------------------------------------------------------------------------------------------------------------------------------------------------------------------------------|----------------------------------|
| [Epub ahead of print] PubMed PMID: 32302955.                                                                                                                                                                                                                                                                                               |                                  |
| 5: Tan YP, Tan BY, Pan J, Wu J, Zeng SZ, Wei HY. Epidemiologic and clinical characteristics of 10 children with coronavirus disease 2019 in Changsha, China. <i>J Clin Virol.</i> 2020 Apr 10;127:104353. doi: 10.1016/j.jcv.2020.104353. [Epub ahead of print] PubMed PMID: 32302953.                                                     | No appropriate population sample |
| 6: Yuan R, Xu QH, Xia CC, Lou CY, Xie Z, Ge QM, Shao Y. Psychological status of parents of hospitalized children during the COVID-19 epidemic in China. <i>Psychiatry Res.</i> 2020 Apr 13;288:112953. doi: 10.1016/j.psychres.2020.112953. [Epub ahead of print] PubMed PMID: 32302814.                                                   | No appropriate outcome           |
| 7: Wang X, Liu W, Zhao J, Lu Y, Wang X, Yu C, Hu S, Shen N, Liu W, Sun Z, Li W. Clinical characteristics of 80 hospitalized frontline medical workers infected with COVID-19 in Wuhan, China. <i>J Hosp Infect.</i> 2020 Apr 14. pii: S0195-6701(20)30194-8. doi: 10.1016/j.jhin.2020.04.019. [Epub ahead of print] PubMed PMID: 32302722. | No appropriate population sample |
| 8: Li Y, Zhou W, Yang L, You R. Physiological and pathological regulation of ACE2, the SARS-CoV-2 receptor. <i>Pharmacol Res.</i> 2020 Apr 14;104833. doi: 10.1016/j.phrs.2020.104833. [Epub ahead of print] Review. PubMed PMID: 32302706.                                                                                                | No appropriate outcome           |
| 9: Stephens EH, Dearani JA, Guleserian KJ, Overman DM, Tweddell JS, Backer CL, Romano JC, Bacha E. COVID-19: Crisis Management in Congenital Heart Surgery. <i>Ann Thorac Surg.</i> 2020 Apr 11. pii: S0003-4975(20)30540-3. doi: 10.1016/j.athoracsur.2020.04.001. [Epub ahead of print] PubMed PMID: 32302660.                           | No appropriate population sample |

|                                                                                                                                                                                                                                                                                                                                                                                                                                                                          |                                         |
|--------------------------------------------------------------------------------------------------------------------------------------------------------------------------------------------------------------------------------------------------------------------------------------------------------------------------------------------------------------------------------------------------------------------------------------------------------------------------|-----------------------------------------|
| <p>10: Lee J. Mental health effects of school closures during COVID-19. <i>Lancet Child Adolesc Health</i>. 2020 Apr 14. pii: S2352-4642(20)30109-7. doi:10.1016/S2352-4642(20)30109-7. [Epub ahead of print] PubMed PMID: 32302537.</p>                                                                                                                                                                                                                                 | <p>No appropriate outcome</p>           |
| <p>11: Garg SK, Rodbard D, Hirsch IB, Forlenza GP. Managing New-Onset Type 1 Diabetes During the COVID-19 Pandemic: Challenges and Opportunities. <i>Diabetes Technol Ther</i>. 2020 Apr 17. doi: 10.1089/dia.2020.0161. [Epub ahead of print] PubMed PMID: 32302499.</p>                                                                                                                                                                                                | <p>No appropriate population sample</p> |
| <p>12: Vlachodimitropoulou Koumoutsea E, Vivanti AJ, Shehata N, Benachi A, Le Gouez A, Desconclois C, Whittle W, Snelgrove J, Malinowski KA. COVID19 and acute coagulopathy in pregnancy. <i>J Thromb Haemost</i>. 2020 Apr 17. doi: 10.1111/jth.14856. [Epub ahead of print] PubMed PMID: 32302459.</p>                                                                                                                                                                 | <p>No appropriate outcome</p>           |
| <p>13: Akima S, McLintock C, Hunt BJ. RE: ISTH interim guidance to recognition and management of coagulopathy in COVID-19. <i>J Thromb Haemost</i>. 2020 Apr 17. doi:10.1111/jth.14853. [Epub ahead of print] PubMed PMID: 32302442.</p>                                                                                                                                                                                                                                 | <p>No appropriate outcome</p>           |
| <p>14: Damle B, Vourvahis M, Wang E, Leaney J, Corrigan B. Clinical Pharmacology Perspectives on the Antiviral Activity of Azithromycin and Use in COVID-19. <i>Clin Pharmacol Ther</i>. 2020 Apr 17. doi: 10.1002/cpt.1857. [Epub ahead of print] Review. PubMed PMID: 32302411.</p>                                                                                                                                                                                    | <p>No appropriate outcome</p>           |
| <p>15: Barnes BJ, Adrover JM, Baxter-Stoltzfus A, Borczuk A, Cools-Lartigue J, Crawford JM, Daßler-Plenker J, Guerci P, Huynh C, Knight JS, Loda M, Looney MR, McAllister F, Rayes R, Renaud S, Rousseau S, Salvatore S, Schwartz RE, Spicer JD, Yost CC, Weber A, Zuo Y, Egeblad M. Targeting potential drivers of COVID-19: Neutrophil extracellular traps. <i>J Exp Med</i>. 2020 Jun 1;217(6). pii: e20200652. doi: 10.1084/jem.20200652. PubMed PMID: 32302401.</p> | <p>No appropriate outcome</p>           |

|                                                                                                                                                                                                                                                                                                                                                                                           |                                         |
|-------------------------------------------------------------------------------------------------------------------------------------------------------------------------------------------------------------------------------------------------------------------------------------------------------------------------------------------------------------------------------------------|-----------------------------------------|
| <p>16: Patel PD, Cobb J, Wright D, Turer R, Jordan T, Humphrey A, Kepner AL, Smith G, Rosenbloom ST. Rapid Development of Telehealth Capabilities within Pediatric Patient Portal Infrastructure for COVID-19 Care: Barriers, Solutions, Results. J Am Med Inform Assoc. 2020 Apr 17. pii: ocaa065. doi: 10.1093/jamia/ocaa065. [Epub</p>                                                 | <p>No appropriate outcome</p>           |
| <p>17: Lagana SM, De Michele S, Lee MJ, Emond JC, Griesemer AD, Tulin-Silver SA, Verna EC, Martinez M, Lefkowitz JH. COVID-19 Associated Hepatitis Complicating Recent Living Donor Liver Transplantation. Arch Pathol Lab Med. 2020 Apr 17. doi:10.5858/arpa.2020-0186-SA. [Epub ahead of print] PubMed PMID: 32302212.</p>                                                              | <p>No appropriate population sample</p> |
| <p>18: Li L, Liu D, Yang L. Reply to "CT Findings of Pregnant Women With Coronavirus Disease (COVID-19) Pneumonia". AJR Am J Roentgenol. 2020 Apr 17:W1. doi:10.2214/AJR.20.23248. [Epub ahead of print] PubMed PMID: 32302206.</p>                                                                                                                                                       | <p>No original article</p>              |
| <p>19: Chen L, Li Q, Zheng D, Jiang H, Wei Y, Zou L, Feng L, Xiong G, Sun G, Wang H, Zhao Y, Qiao J. Clinical Characteristics of Pregnant Women with Covid-19 in Wuhan, China. N Engl J Med. 2020 Apr 17. doi: 10.1056/NEJMc2009226. [Epub ahead of print] PubMed PMID: 32302077.</p>                                                                                                     | <p>Overlapping data</p>                 |
| <p>20: Chen X, Zhao B, Qu Y, Chen Y, Xiong J, Feng Y, Men D, Huang Q, Liu Y, Yang B, Ding J, Li F. Detectable serum SARS-CoV-2 viral load (RNAemia) is closely correlated with drastically elevated interleukin 6 (IL-6) level in critically ill COVID-19 patients. Clin Infect Dis. 2020 Apr 17. pii: ciaa449. doi:10.1093/cid/ciaa449. [Epub ahead of print] PubMed PMID: 32301997.</p> | <p>No appropriate outcome</p>           |
| <p>21: Paret M, Lighter J, Pellett Madan R, Raabe VN, Shust GF, Ratner AJ. SARS-CoV-2 infection (COVID-19) in febrile infants without respiratory distress. Clin Infect Dis. 2020 Apr 17. pii: ciaa452. doi:</p>                                                                                                                                                                          | <p>Included</p>                         |

|                                                                                                                                                                                                                                                                                                                                                                                                                                                                                                                                                 |                                         |
|-------------------------------------------------------------------------------------------------------------------------------------------------------------------------------------------------------------------------------------------------------------------------------------------------------------------------------------------------------------------------------------------------------------------------------------------------------------------------------------------------------------------------------------------------|-----------------------------------------|
| <p>10.1093/cid/ciaa452. [Epub ahead of print] PubMed PMID: 32301967.</p>                                                                                                                                                                                                                                                                                                                                                                                                                                                                        |                                         |
| <p>22: Franco-Paredes C. Albert Camus' 'The COVID-19 Plague' Revisited. Clin Infect Dis. 2020 Apr 17. pii: ciaa454. doi: 10.1093/cid/ciaa454. [Epub ahead of print] PubMed PMID: 32301966.</p>                                                                                                                                                                                                                                                                                                                                                  | <p>No appropriate population sample</p> |
| <p>23: Li W, Zhang B, Lu J, Liu S, Chang Z, Cao P, Liu X, Zhang P, Ling Y, Tao K, Chen J. The characteristics of household transmission of COVID-19. Clin Infect Dis. 2020 Apr 17. pii: ciaa450. doi: 10.1093/cid/ciaa450. [Epub ahead of print] PubMed PMID: 32301964.</p>                                                                                                                                                                                                                                                                     | <p>No appropriate population sample</p> |
| <p>24: Ademuyiwa AO, Bekele A, Berhea AB, Borgstein E, Capo-Chichi N, Derbew M, Evans FM, Feyssa MD, Galukande M, Gawande AA, Gueye SM, Harrison E, Jani P, Kaseje N, Litswa L, Mammo TN, Mellin-Olsen J, Muguti G, Nabukenya MT, Ngoga E, Ntirenganya F, Rulisa S, Starr N, Tabiri S, Tadesse M, Walker I, Weiser TG, Wren SM. COVID-19 Preparedness within the Surgical, Obstetric and Anesthetic Ecosystem in Sub-Saharan Africa. Ann Surg. 2020 Apr 13. doi: 10.1097/SLA.0000000000003964. [Epub ahead of print] PubMed PMID: 32301806.</p> | <p>No appropriate outcome</p>           |
| <p>25: Grünebaum A, Dudenhausen J, McCullough LB, Chervenak FA. Women and children first: the need for ringfencing during the COVID-19 pandemic. J Perinat Med. 2020 Apr 16. pii: /j/jpme.ahead-of-print/jpm-2020-0149/jpm-2020-0149.xml. doi:10.1515/jpm-2020-0149. [Epub ahead of print] PubMed PMID: 32301752.</p>                                                                                                                                                                                                                           | <p>No original article</p>              |
| <p>26: Jiang S, Liu P, Xiong G, Yang Z, Wang M, Li Y, Yu XJ. Coinfection of SARS-CoV-2 and multiple respiratory pathogens in children. Clin Chem Lab Med. 2020 Apr 16. pii: /j/cclm.ahead-of-print/cclm-2020-0434/cclm-2020-0434.xml. doi: 10.1515/cclm-2020-0434.</p>                                                                                                                                                                                                                                                                          | <p>No appropriate population sample</p> |

|                                                                                                                                                                                                                                                                                                               |                                  |
|---------------------------------------------------------------------------------------------------------------------------------------------------------------------------------------------------------------------------------------------------------------------------------------------------------------|----------------------------------|
| [Epub ahead of print] PubMed PMID: 32301747.                                                                                                                                                                                                                                                                  |                                  |
| 27: Monteleone PA, Nakano M, Lazar V, Gomes AP, de H Martin, Bonetti TC. A reviewc of initial data on pregnancy during the COVID-19 outbreak: implications forvassisted reproductive treatments. JBRA Assist Reprod. 2020 May 1;24(2):219-225.doi: 10.5935/1518-0557.20200030. Review. PubMed PMID: 32301600. | No original article              |
| 28: Du W, Yu J, Wang H, Zhang X, Zhang S, Li Q, Zhang Z. Clinical characteristicsof COVID-19 in children compared with adults in Shandong Province, China.Infection. 2020 Apr 16. doi: 10.1007/s15010-020-01427-2. [Epub ahead of print]PubMed PMID: 32301099.                                                | No appropriate population sample |
| 29: Ding J, Fu H, Liu Y, Gao J, Li Z, Zhao X, Zheng J, Sun W, Ni H, Ma X, Feng J,Wu A, Liu J, Wang Y, Geng P, Chen Y. Prevention and control measures in radiologydepartment for COVID-19. Eur Radiol. 2020 Apr 16. doi:10.1007/s00330-020-06850-5. [Epub ahead of print] PubMed PMID: 32300968.              | No appropriate outcome           |
| 30: Promislow DEL. A geroscience perspective on COVID-19 mortality. J Gerontol A Biol Sci Med Sci. 2020 Apr 17. pii: glaa094. doi: 10.1093/gerona/glaa094. [Epubahead of print] PubMed PMID: 32300796.                                                                                                        | No appropriate outcome           |
| 31: Ramphul K, Mejias SG. Coronavirus Disease: A Review of a New Threat to PublicHealth. Cureus. 2020 Mar 15;12(3):e7276. doi: 10.7759/cureus.7276. Review. PubMedPMID: 32300496; PubMed Central PMCID: PMC7158591.                                                                                           | No original article              |



|                                                                                                                                                                                                                                                                                                                                                                                                                                                                                                                                                                                                                                                                 |                                         |
|-----------------------------------------------------------------------------------------------------------------------------------------------------------------------------------------------------------------------------------------------------------------------------------------------------------------------------------------------------------------------------------------------------------------------------------------------------------------------------------------------------------------------------------------------------------------------------------------------------------------------------------------------------------------|-----------------------------------------|
| <p>32: Ascierto PA, Fox B, Urba W, Anderson AC, Atkins MB, Borden EC, Brahmer J, Butterfield LH, Cesano A, Chen D, de Gruijl T, Dillman RO, Drake CG, Emens LA, Gajewski TF, Gulley JL, Stephen Hodi F, Hwu P, Kaufman D, Kaufman H, Lotze M, McNeel DG, Margolin K, Marincola F, Mastrangelo MJ, Maus MV, Parkinson DR, Romero PJ, Sondel PM, Spranger S, Sznol M, Weiner GJ, Wiggington JM, Weber JS. Insights from immuno-oncology: the Society for Immunotherapy of Cancer Statement on access to IL-6-targeting therapies for COVID-19. <i>J Immunother Cancer</i>. 2020 Apr;8(1). pii: e000878. doi: 10.1136/jitc-2020-000878. PubMed PMID: 32300051.</p> | <p>No appropriate outcome</p>           |
| <p>33: Gupta L, Misra DP, Agarwal V, Balan S, Agarwal V. Management of rheumatic diseases in the time of covid-19 pandemic: perspectives of rheumatology practitioners from India. <i>Ann Rheum Dis</i>. 2020 Apr 16. pii: annrheumdis-2020-217509. doi: 10.1136/annrheumdis-2020-217509. [Epub ahead of print] PubMed PMID: 32299795.</p>                                                                                                                                                                                                                                                                                                                      | <p>No appropriate population sample</p> |
| <p>34: Paquin V, Lemire M, King S. Ecosystem approaches to the risk for schizophrenia. <i>Schizophr Res</i>. 2020 Apr 10. pii: S0920-9964(20)30168-7. doi: 10.1016/j.schres.2020.03.057. [Epub ahead of print] PubMed PMID: 32299718.</p>                                                                                                                                                                                                                                                                                                                                                                                                                       | <p>No appropriate population sample</p> |
| <p>35: Mogharab V, Pasha AMK, Javdani F, Hatami N. The first case of COVID-19 infection in a 75-day-old infant in Jahrom City, south of Iran. <i>J Formos Med Assoc</i>. 2020 Apr 13. pii: S0929-6646(20)30107-8. doi: 10.1016/j.jfma.2020.03.015. [Epub ahead of print] PubMed PMID: 32299654.</p>                                                                                                                                                                                                                                                                                                                                                             | <p>No appropriate population sample</p> |
| <p>36: Chirico F, Nucera G, Magnavita N. COVID-19: Protecting Healthcare Workers is a priority. <i>Infect Control Hosp Epidemiol</i>. 2020 Apr 17;1-4. doi: 10.1017/ice.2020.148. [Epub ahead of print] PubMed PMID: 32299519.</p>                                                                                                                                                                                                                                                                                                                                                                                                                              | <p>No appropriate population sample</p> |

|                                                                                                                                                                                                                                                                                                                                                                                                     |                                  |
|-----------------------------------------------------------------------------------------------------------------------------------------------------------------------------------------------------------------------------------------------------------------------------------------------------------------------------------------------------------------------------------------------------|----------------------------------|
| <p>37: Zhao ZY, Chen Q, Zhao B, Hannah MN, Wang N, Wang YX, Xuan XF, Rui J, Chu MJ, Yu SS, Wang Y, Liu XC, An R, Pan LL, Chiang YC, Su YH, Zhao BH, Chen TM. Relativetransmissibility of shigellosis among male and female individuals: a modelingstudy in Hubei Province, China. <i>Infect Dis Poverty</i>. 2020 Apr 17;9(1):39. doi:10.1186/s40249-020-00654-x. PubMed PMID: 32299485.</p>        | No appropriate outcome           |
| <p>38: Bulut C, Kato Y. Epidemiology of COVID-19. <i>Turk J Med Sci</i>. 2020 Apr 17. doi: 10.3906/sag-2004-172. [Epub ahead of print] PubMed PMID: 32299206.</p>                                                                                                                                                                                                                                   | No appropriate outcome           |
| <p>39: Bachanova V, Bishop MR, Dahi P, Dholaria B, Grupp SA, Hayes-Lattin B,Janakiram M, Maziarz RT, McGuirk JP, Nastoupil LJ, Oluwole OO, Perales MA, PorterDL, Riedell PA. CAR T Cell Therapy During the COVID-19 Pandemic. <i>Biol BloodMarrow Transplant</i>. 2020 Apr 13. pii: S1083-8791(20)30217-2. doi:10.1016/j.bbmt.2020.04.008. [Epub ahead of print] Review. PubMed PMID: 32298807.</p> | No appropriate outcome           |
| <p>40: Procianoy RS, Silveira RC, Manzoni P, Sant'Anna G. Neonatal COVID-19: little evidence and the need for more information. <i>J Pediatr (Rio J)</i>. 2020 Apr 11. pii: S0021-7557(20)30143-1. doi: 10.1016/j.jped.2020.04.002. [Epub ahead of print]PubMed PMID: 32298645.</p>                                                                                                                 | No original article              |
| <p>41: de Niet A, Waanders BL, Walraven I. The role of children in the transmission of mild SARS-CoV-2 infection. <i>Acta Paediatr</i>. 2020 Apr 16. doi: 10.1111/apa.15310.[Epub ahead of print] PubMed PMID: 32298494.</p>                                                                                                                                                                        | No appropriate outcome           |
| <p>42: Frieden IJ, Püttgen KB, Drolet BA, Garzon MC, Chamlin SL, Pope E, Mancini AJ,Lauren CT, Mathes EF, Siegel DH, Gupta D, Haggstrom AN, Tollefson MM, Baselga E, Morel KD, Shah SD, Holland KE, Adams DM, Horii KA, Newell BD, Powell J, McCuaigCC, Nopper AJ, Metry DW, Maguiness S;</p>                                                                                                       | No appropriate population sample |

|                                                                                                                                                                                                                                                                                                                                                                                                                                                                                                                                                                                                                                                                                                                |                                  |
|----------------------------------------------------------------------------------------------------------------------------------------------------------------------------------------------------------------------------------------------------------------------------------------------------------------------------------------------------------------------------------------------------------------------------------------------------------------------------------------------------------------------------------------------------------------------------------------------------------------------------------------------------------------------------------------------------------------|----------------------------------|
| <p>Hemangioma Investigator Group.<br/>Management of Infantile Hemangiomas during the COVID Pandemic. <i>Pediatr Dermatol.</i> 2020 Apr 16. doi: 10.1111/pde.14196. [Epub ahead of print] PubMed PMID: 32298480.</p>                                                                                                                                                                                                                                                                                                                                                                                                                                                                                            |                                  |
| <p>43: Fix OK, Hameed B, Fontana RJ, Kwok RM, McGuire BM, Mulligan DC, Pratt DS, Russo MW, Schilsky ML, Verna EC, Loomba R, Cohen DE, Bezerra JA, Reddy KR, Chung RT. Clinical Best Practice Advice for Hepatology and Liver Transplant Providers During the COVID-19 Pandemic: AASLD Expert Panel Consensus Statement. <i>Hepatology.</i> 2020 Apr 16. doi: 10.1002/hep.31281. [Epub ahead of print] PubMed PMID: 32298473.</p>                                                                                                                                                                                                                                                                               | No appropriate population sample |
| <p>44: Sainati L, Biffi A. How we deal with the COVID-19 epidemic in an Italian pediatric onco-hematology clinic located in a region at high density of cases. <i>Br J Haematol.</i> 2020 Apr 16. doi: 10.1111/bjh.16699. [Epub ahead of print] PubMed PMID: 32298461.</p>                                                                                                                                                                                                                                                                                                                                                                                                                                     | No appropriate population sample |
| <p>45: Li M, Chen L, Zhang J, Xiong C, Li X. The SARS-CoV-2 receptor ACE2 expression of maternal-fetal interface and fetal organs by single-cell transcriptome study. <i>PLoS One.</i> 2020 Apr 16;15(4):e0230295. doi: 10.1371/journal.pone.0230295. eCollection 2020. PubMed PMID: 32298273.</p>                                                                                                                                                                                                                                                                                                                                                                                                             | No appropriate outcome           |
| <p>46: Garg S, Kim L, Whitaker M, O'Halloran A, Cummings C, Holstein R, Prill M, Chai SJ, Kirley PD, Alden NB, Kawasaki B, Yousey-Hindes K, Niccolai L, Anderson EJ, Openo KP, Weigel A, Monroe ML, Ryan P, Henderson J, Kim S, Como-Sabetti K, Lynfield R, Sosin D, Torres S, Muse A, Bennett NM, Billing L, Sutton M, West N, Schaffner W, Talbot HK, Aquino C, George A, Budd A, Brammer L, Langley G, Hall AJ, Fry A. Hospitalization Rates and Characteristics of Patients Hospitalized with Laboratory-Confirmed Coronavirus Disease 2019 - COVID-NET, 14 States, March 1-30, 2020. <i>MMWR Morb Mortal Wkly Rep.</i> 2020 Apr 17;69(15):458-464. doi:10.15585/mmwr.mm6915e3. PubMed PMID: 32298251.</p> | No useful data                   |

|                                                                                                                                                                                                                                                                                                                                                                                                      |                                         |
|------------------------------------------------------------------------------------------------------------------------------------------------------------------------------------------------------------------------------------------------------------------------------------------------------------------------------------------------------------------------------------------------------|-----------------------------------------|
| <p>47: Ghinai I, Woods S, Ritger KA, McPherson TD, Black SR, Sparrow L, FricchioneMJ, Kerins JL, Pacilli M, Ruestow PS, Arwady MA, Beavers SF, Payne DC, KirkingHL, Layden JE. Community Transmission of SARS-CoV-2 at Two Family Gatherings - Chicago, Illinois, February-March 2020. MMWR Morb Mortal Wkly Rep. 2020 Apr17;69(15):446-450. doi: 10.15585/mmwr.mm6915e1. PubMed PMID: 32298246.</p> | <p>No appropriate population sample</p> |
| <p>48: Chen WH, Hotez PJ, Bottazzi ME. Potential for developing a SARS-CoV-2 receptor-binding domain (RBD) recombinant protein as a heterologous human vaccine against coronavirus infectious disease (COVID)-19. Hum Vaccin Immunother. 2020 Apr 16:1-4. doi: 10.1080/21645515.2020.1740560. [Epub ahead of print] PubMed PMID: 32298218.</p>                                                       | <p>No appropriate outcome</p>           |
| <p>49: Li L, Liu D, Yang L. Follow-Up Information About the Four Pregnant Patients With Coronavirus Disease (COVID-19) Pneumonia Who Were Still in the Hospital at the End of Our Study. AJR Am J Roentgenol. 2020 Apr 16:W1-W2. doi:10.2214/AJR.20.23247. [Epub ahead of print] PubMed PMID: 32298148.</p>                                                                                          | <p>Included</p>                         |
| <p>50: Han MS, Seong MW, Heo EY, Park JH, Kim N, Shin S, Cho SI, Park SS, Choi EH. Sequential analysis of viral load in a neonate and her mother infected with SARS-CoV-2. Clin Infect Dis. 2020 Apr 16. pii: ciaa447. doi: 10.1093/cid/ciaa447. [Epub ahead of print] PubMed PMID: 32297925.</p>                                                                                                    | <p>Included</p>                         |
| <p>51: Scorzoloni L, Corpolongo A, Castilletti C, Lalle E, Mariano A, Nicastrì E. Comment of the potential risks of sexual and vertical transmission of Covid-19 infection. Clin Infect Dis. 2020 Apr 16. pii: ciaa445. doi: 10.1093/cid/ciaa445. [Epub ahead of print] PubMed PMID: 32297915.</p>                                                                                                   | <p>No original article</p>              |

|                                                                                                                                                                                                                                                                                                                                                                                                        |                                         |
|--------------------------------------------------------------------------------------------------------------------------------------------------------------------------------------------------------------------------------------------------------------------------------------------------------------------------------------------------------------------------------------------------------|-----------------------------------------|
| <p>52: Rezaei N. COVID-19 affects Healthy Pediatricians more than PediatricPatients. Infect Control Hosp Epidemiol. 2020 Apr 16:1-3. doi:10.1017/ice.2020.139. [Epub ahead of print] PubMed PMID: 32297847.</p>                                                                                                                                                                                        | <p>No appropriate population sample</p> |
| <p>53: Siskind D, Honer WG, Clark S, Correll CU, Hasan A, Howes O, Kane JM, KellyDL, Laitman R, Lee J, MacCabe JH, Myles N, Nielsen J, Schulte PF, Taylor D, Verdoux H, Wheeler A, Freudenreich O. Consensus statement on the use of clozapine during the COVID-19 pandemic. J Psychiatry Neurosci. 2020 Apr 3;45(4):200061. doi: 10.1503/jpn.200061. [Epub ahead of print] PubMed PMID: 32297722.</p> | <p>No appropriate outcome</p>           |
| <p>54: Lam JCM, Moshi GB, Ang SH, Chew HM, Ng QH, Madjukie A, M L. Management of COVID-19 Related Paediatric Blood Samples in a Clinical Haematology Laboratory. Br J Haematol. 2020 Apr 16. doi: 10.1111/bjh.16721. [Epub ahead of print] PubMed PMID: 32297317.</p>                                                                                                                                  | <p>No appropriate outcome</p>           |
| <p>55: Costi S, Caporali R, Cimaz R. Dealing with COVID-19 in a Pediatric Rheumatology Unit in Italy. Paediatr Drugs. 2020 Apr 16. doi:10.1007/s40272-020-00395-2. [Epub ahead of print] PubMed PMID: 32297225.</p>                                                                                                                                                                                    | <p>No appropriate outcome</p>           |
| <p>56: Hermann A, Deligiannidis KM, Bergink V, Monk C, Fitelson EM, Robakis TK, Birndorf C. Response to SARS-Covid-19-related visitor restrictions on labor and delivery wards in New York City. Arch Womens Ment Health. 2020 Apr 15. doi:10.1007/s00737-020-01030-2. [Epub ahead of print] PubMed PMID: 32296947.</p>                                                                                | <p>No appropriate outcome</p>           |
| <p>57: Xu P, Zhou Q, Xu J. Mechanism of thrombocytopenia in COVID-19 patients. Ann Hematol. 2020 Apr 15. doi: 10.1007/s00277-020-04019-0. [Epub ahead of print] Review. PubMed PMID: 32296910.</p>                                                                                                                                                                                                     | <p>No appropriate outcome</p>           |

|                                                                                                                                                                                                                                                                                                                                                         |                               |
|---------------------------------------------------------------------------------------------------------------------------------------------------------------------------------------------------------------------------------------------------------------------------------------------------------------------------------------------------------|-------------------------------|
| <p>58: LaCourse SM, John-Stewart G, Adams Waldorf KM. Importance of inclusion of pregnant and breastfeeding women in COVID-19 therapeutic trials. Clin Infect Dis.2020 Apr 15. pii: ciaa444. doi: 10.1093/cid/ciaa444. [Epub ahead of print] PubMedPMID: 32296817.</p>                                                                                  | <p>No appropriate outcome</p> |
| <p>59: Chen F, Hao YT, Zhang ZJ, Tang JL, Xia JL, Zhan SY, Zhao Y, Du ZC, Wei YY,Shen SP, Jiang QW, Li LM. [An urgent call for raising the scientific rigorousnessof clinical trials on COVID-19]. Zhonghua Liu Xing Bing Xue Za Zhi. 2020 Mar10;41(3):301-302. doi: 10.3760/cma.j.issn.0254-6450.2020.03.004. Chinese. PubMed PMID: 32294824.</p>      | <p>No appropriate outcome</p> |
| <p>60: Warrillow S, Austin D, Cheung W, Close E, Holley A, Horgan B, Jansen M, JoyntG, Lister P, Moodie S, Nichol A, Nicholls M, Peake S, Skowronski G, Streat S,White B, Willmott L. ANZICS guiding principles for complex decision making duringthe COVID-19 pandemic. Crit Care Resusc. 2020 Apr 15. [Epub ahead of print]PubMed PMID: 32294810.</p> | <p>No original article</p>    |
| <p>61: Yang H, Sun G, Tang F, Peng M, Gao Y, Peng J, Xie H, Zhao Y, Jin Z. Clinical Features and Outcomes of Pregnant Women Suspected of Coronavirus Disease 2019. J Infect. 2020 Apr 12. pii: S0163-4453(20)30212-7. doi: 10.1016/j.jinf.2020.04.003.[Epub ahead of print] PubMed PMID: 32294503; PubMed Central PMCID: PMC7152867.</p>                | <p>Included</p>               |
| <p>62: Bovbjerg ML. Current Resources for Evidence-Based Practice, May 2020. JObstet Gynecol Neonatal Nurs. 2020 Apr 10. pii: S0884-2175(20)30044-7. doi:10.1016/j.jogn.2020.04.001. [Epub ahead of print] PubMed PMID: 32294453; PubMedCentral PMCID: PMC7151442.</p>                                                                                  | <p>No appropriate outcome</p> |
| <p>63: Lowe B, Bopp B. COVID-19 vaginal delivery - a case report. Aust N Z J Obstet Gynaecol. 2020 Apr 15. doi: 10.1111/ajo.13173. [Epub ahead of print] PubMed PMID:32294229</p>                                                                                                                                                                       | <p>Included</p>               |

|                                                                                                                                                                                                                                                                                                                                                                                                                                                                                                                                                                                   |                                         |
|-----------------------------------------------------------------------------------------------------------------------------------------------------------------------------------------------------------------------------------------------------------------------------------------------------------------------------------------------------------------------------------------------------------------------------------------------------------------------------------------------------------------------------------------------------------------------------------|-----------------------------------------|
| <p>64: Yuan S, Liao Z, Huang H, Jiang B, Zhang X, Wang Y, Zhao M. Comparison of the Indicators of Psychological Stress in the Population of Hubei Province and Non-Endemic Provinces in China During Two Weeks During the Coronavirus Disease 2019 (COVID-19) Outbreak in February 2020. <i>Med Sci Monit.</i> 2020 Apr 15;26:e923767. doi: 10.12659/MSM.923767. PubMed PMID: 32294078.</p>                                                                                                                                                                                       | <p>No appropriate outcome</p>           |
| <p>65: Henderson LA, Canna SW, Schulert GS, Volpi S, Lee PY, Kernan KF, Caricchio R, Mahmud S, Hazen MM, Halyabar O, Hoyt KJ, Han J, Grom AA, Gattorno M, Ravelli A, de Benedetti F, Behrens EM, Cron RQ, Nigrovic PA. On the alert for cytokine storm: Immunopathology in COVID-19. <i>Arthritis Rheumatol.</i> 2020 Apr 15. doi:10.1002/art.41285. [Epub ahead of print] PubMed PMID: 32293098.</p>                                                                                                                                                                             | <p>No appropriate outcome</p>           |
| <p>66: Marongiu F, Grandone E, Barcellona D. Pulmonary thrombosis in 2019-nCoV pneumonia? <i>J Thromb Haemost.</i> 2020 Apr 15. doi: 10.1111/jth.14818. [Epub ahead of print] PubMed PMID: 32293083.</p>                                                                                                                                                                                                                                                                                                                                                                          | <p>No appropriate population sample</p> |
| <p>67: Breslin N, Baptiste C, Gyamfi-Bannerman C, Miller R, Martinez R, Bernstein K, Ring L, Landau R, Purisch S, Friedman AM, Fuchs K, Sutton D, Andrikopoulou M, Rupley D, Sheen JJ, Aubey J, Zork N, Moroz L, Mourad M, Wapner R, Simpson LL, D'Alton ME, Goffman D. COVID-19 infection among asymptomatic and symptomatic pregnant women: Two weeks of confirmed presentations to an affiliated pair of New York City hospitals. <i>Am J Obstet Gynecol MFM.</i> 2020 Apr 9:100118. doi:10.1016/j.ajogmf.2020.100118. [Epub ahead of print] PubMed PMID: 32292903; PubMed</p> | <p>Included</p>                         |
| <p>68: Di Mascio D, Khalil A, Saccone G, Rizzo G, Buca D, Liberati M, Vecchiet J, Nappi L, Scambia G, Berghella V, D'Antonio F. Outcome of Coronavirus spectrum infections (SARS, MERS, COVID 1 -19) during pregnancy: a systematic review and meta-analysis. <i>Am J Obstet Gynecol MFM.</i> 2020 Mar 25:100107.</p>                                                                                                                                                                                                                                                             | <p>No original article</p>              |

|                                                                                                                                                                                                                                                                                                                                                                                   |                                  |
|-----------------------------------------------------------------------------------------------------------------------------------------------------------------------------------------------------------------------------------------------------------------------------------------------------------------------------------------------------------------------------------|----------------------------------|
| doi:10.1016/j.ajogmf.2020.100107. [Epub ahead of print] Review. PubMed PMID:32292902; PubMed Central PMCID: PMC7104131.                                                                                                                                                                                                                                                           |                                  |
| 69: Raoult D, Zumla A, Locatelli F, Ippolito G, Kroemer G. Coronavirusinfections: Epidemiological, clinical and immunological features and hypotheses. Cell Stress. 2020 Mar 2;4(4):66-75. doi: 10.15698/cst2020.04.216. PubMed PMID:32292881; PubMed Central PMCID: PMC7146059.                                                                                                  | No original article              |
| 70: Fan L, Li D, Xue H, Zhang L, Liu Z, Zhang B, Zhang L, Yang W, Xie B, Duan X, Hu X, Cheng K, Peng L, Yu N, Song L, Chen H, Sui X, Zheng N, Liu S, Jin Z. Progress and prospect on imaging diagnosis of COVID-19. Chin J Acad Radiol. 2020 Mar 18:1-10. doi: 10.1007/s42058-020-00031-5. [Epub ahead of print] Review. PubMed PMID: 32292880; PubMed Central PMCID: PMC7149076. | No appropriate outcome           |
| 71: Zanon D, Manca A, De Nicolò A, D'Avolio A, Musazzi UM, Cilurzo F, Maximova N, Tomasello C, Minghetti P. Data on the stability of darunavir/cobicistat suspension after tablet manipulation. Data Brief. 2020 Apr 12:105552. doi:10.1016/j.dib.2020.105552. [Epub ahead of print] PubMed PMID: 32292805; PubMed Central PMCID: PMC7152873.                                     | No appropriate outcome           |
| 72: Omer S, Ali S, Babar ZUD. Preventive measures and management of COVID-19 in pregnancy. Drugs Ther Perspect. 2020 Apr 9:1-4. doi: 10.1007/s40267-020-00725-x. [Epub ahead of print] PubMed PMID: 32292265; PubMed Central PMCID: PMC7143201.                                                                                                                                   | No original article              |
| 73: Shi B, Xia Z, Xiao S, Huang C, Zhou X, Xu H. Severe Pneumonia Due to SARS-CoV-2 and Respiratory Syncytial Virus Infection: A Case Report. Clin Pediatr(Phila). 2020 Apr 15:9922820920016. doi: 10.1177/0009922820920016. [Epub ahead of print] PubMed PMID: 32292053.                                                                                                         | No appropriate population sample |



|                                                                                                                                                                                                                                                                                                                                                                                                                                                                                                 |                                         |
|-------------------------------------------------------------------------------------------------------------------------------------------------------------------------------------------------------------------------------------------------------------------------------------------------------------------------------------------------------------------------------------------------------------------------------------------------------------------------------------------------|-----------------------------------------|
| <p>74: Francis TJ. Waiting for COVID-19. <i>J Paediatr Child Health</i>. 2020 Apr 15. doi: 10.1111/jpc.14891. [Epub ahead of print] PubMed PMID: 32291858.</p>                                                                                                                                                                                                                                                                                                                                  | <p>No appropriate population sample</p> |
| <p>75: Coletto LA, Favalli EG, Caporali R. Psoriasis and Psoriatic Arthritis: how to manage Immunosuppressants in COVID-19 days. <i>Dermatol Ther</i>. 2020 Apr 14:e13415.doi: 10.1111/dth.13415. [Epub ahead of print] PubMed PMID: 32291828.</p>                                                                                                                                                                                                                                              | <p>No appropriate population sample</p> |
| <p>76: Mu J, Xu J, Zhang L, Shu T, Wu D, Huang M, Ren Y, Li X, Geng Q, Xu Y, Qiu Y, Zhou X. SARS-CoV-2-encoded nucleocapsid protein acts as a viral suppressor of RNA interference in cells. <i>Sci China Life Sci</i>. 2020 Apr 10. doi:10.1007/s11427-020-1692-1. [Epub ahead of print] PubMed PMID: 32291557.</p>                                                                                                                                                                            | <p>No appropriate outcome</p>           |
| <p>77: Duan YN, Zhu YQ, Tang LL, Qin J. CT features of novel coronavirus pneumonia(COVID-19) in children. <i>Eur Radiol</i>. 2020 Apr 14. doi: 10.1007/s00330-020-06860-3.[Epub ahead of print] Review. PubMed PMID: 32291501.</p>                                                                                                                                                                                                                                                              | <p>No original article</p>              |
| <p>78: Mayor S. Covid-19: Nine in 10 pregnant women with infection when admitted for delivery are asymptomatic, small study finds. <i>BMJ</i>. 2020 Apr 14;369:m1485. doi:10.1136/bmj.m1485. PubMed PMID: 32291260.</p>                                                                                                                                                                                                                                                                         | <p>No original article</p>              |
| <p>79: Quaedackers JSLT, Stein R, Bhatt N, Dogan HS, Hoen L, Nijman RJM, Radmayr C, Silay MS, Tekgul S, Bogaert G. Clinical and surgical consequences of the COVID-19 pandemic for patients with pediatric urological problems: Statement of the EAUGuidelines panel for paediatric urology, March 30 2020. <i>J Pediatr Urol</i>. 2020 Apr 9. pii: S1477-5131(20)30105-4. doi: 10.1016/j.jpuro.2020.04.007. [Epub ahead of print] PubMed PMID: 32291208; PubMed Central PMCID: PMC7144609.</p> | <p>No appropriate outcome</p>           |

|                                                                                                                                                                                                                                                                                                                                                                                                                                                                                                                                                                                                                                                                                                                                                                            |                                         |
|----------------------------------------------------------------------------------------------------------------------------------------------------------------------------------------------------------------------------------------------------------------------------------------------------------------------------------------------------------------------------------------------------------------------------------------------------------------------------------------------------------------------------------------------------------------------------------------------------------------------------------------------------------------------------------------------------------------------------------------------------------------------------|-----------------------------------------|
| <p>80: Parikh SR, Avansino JR, Dick AA, Enriquez BK, Geiduschek JM, Martin LD, McDonald RA, Yandow SM, Zerr DM, Ojemann JG. Collaborative Multi-Disciplinary Incident Command at Seattle Children's Hospital for Rapid Preparatory Pediatric Surgery Countermeasures to the COVID-19 Pandemic. <i>J Am Coll Surg.</i> 2020 Apr 11. pii: S1072-7515(20)30319-7. doi: 10.1016/j.jamcollsurg.2020.04.012. [Epub ahead of print] PubMed PMID: 32289376; PubMed Central PMCID: PMC7151263.</p>                                                                                                                                                                                                                                                                                  | <p>No original article</p>              |
| <p>81: Ramos KJ, Pilewski JM, Faro A, Marshall BC. Improved Prognosis in Cystic Fibrosis: Consideration for Intensive Care During the COVID-19 Pandemic. <i>Am J Respir Crit Care Med.</i> 2020 Apr 14. doi: 10.1164/rccm.202004-0999LE. [Epub ahead of print] PubMed PMID: 32289235.</p>                                                                                                                                                                                                                                                                                                                                                                                                                                                                                  | <p>No appropriate population sample</p> |
| <p>82: Gudbjartsson DF, Helgason A, Jonsson H, Magnusson OT, Melsted P, Norddahl GL, Saemundsdottir J, Sigurdsson A, Sulem P, Agustsdottir AB, Eiriksdottir B, Fridriksdottir R, Gardarsdottir EE, Georgsson G, Gretarsdottir OS, Gudmundsson KR, Gunnarsdottir TR, Gylfason A, Holm H, Jensson BO, Jonasdottir A, Jonsson F, Josefsdottir KS, Kristjansson T, Magnusdottir DN, le Roux L, Sigmundsdottir G, Sveinbjornsson G, Sveinsdottir KE, Sveinsdottir M, Thorarensen EA, Thorbjornsson B, Löve A, Masson G, Jonsdottir I, Möller AD, Gudnason T, Kristinsson KG, Thorsteinsdottir U, Stefansson K. Spread of SARS-CoV-2 in the Icelandic Population. <i>N Engl J Med.</i> 2020 Apr 14. doi: 10.1056/NEJMoa2006100. [Epub ahead of print] PubMed PMID: 32289214.</p> | <p>No appropriate outcome</p>           |
| <p>83: Khoo EJ, Lantos JD. Lessons learned from the COVID-19 pandemic. <i>Acta Paediatr.</i> 2020 Apr 14. doi: 10.1111/apa.15307. [Epub ahead of print] PubMed PMID: 32289175</p>                                                                                                                                                                                                                                                                                                                                                                                                                                                                                                                                                                                          | <p>No original article</p>              |

|                                                                                                                                                                                                                                                                                                                                                                                                                                                                                                                                                                                                                                                                                                                                                                                                                                                                                                                                                                                                                                      |                                         |
|--------------------------------------------------------------------------------------------------------------------------------------------------------------------------------------------------------------------------------------------------------------------------------------------------------------------------------------------------------------------------------------------------------------------------------------------------------------------------------------------------------------------------------------------------------------------------------------------------------------------------------------------------------------------------------------------------------------------------------------------------------------------------------------------------------------------------------------------------------------------------------------------------------------------------------------------------------------------------------------------------------------------------------------|-----------------------------------------|
| <p>84: Prokunina-Olsson L, Alphonse N, Dickenson RE, Durbin JE, Glenn JS, HartmannR, Kotenko SV, Lazear HM, O'Brien TR, Odendall C, Onabajo OO, Piontkivska H, Santer DM, Reich NC, Wack A, Zanoni I. COVID-19 and emerging viral infections: The case for interferon lambda. <i>J Exp Med.</i> 2020 May 4;217(5). pii: e20200653. doi: 10.1084/jem.20200653. PubMed PMID: 32289152.</p>                                                                                                                                                                                                                                                                                                                                                                                                                                                                                                                                                                                                                                             | <p>No appropriate outcome</p>           |
| <p>85: Matava CT, Kovatsis PG, Summers JL, Castro P, Denning S, Yu J, Lockman JL, Von Ungern-Sternberg B, Sabato S, Lee LK, Ayad I, Mireles S, Lardner D, Whyte S, Szolnoki J, Jagannathan N, Thompson N, Stein ML, Dalesio N, Greenberg R, McCloskey J, Peyton J, Evans F, Haydar B, Reynolds P, Chiao F, Taicher B, Templeton T, Bhalla T, Raman VT, Garcia-Marcinkiewicz A, Gálvez J, Tan J, Rehman M, Crockett C, Olomu P, Szmuk P, Glover C, Matuszczak M, Galvez I, Hunyady A, Polaner D, Gooden C, Hsu G, Gumaney H, Pérez-Pradilla C, Kiss EE, Theroux MC, Lau J, Asaf S, Ingelmo P, Engelhardt T, Hervías M, Greenwood E, Javia L, Disma N, Yaster M, Fiadjoe JE; PeDI-Collaborative. Pediatric Airway Management in COVID-19 patients - Consensus Guidelines from the Society for Pediatric Anesthesia's Pediatric Difficult Intubation Collaborative and the Canadian Pediatric Anesthesia Society. <i>Anesth Analg.</i> 2020 Apr 13. doi: 10.1213/ANE.0000000000004872. [Epub ahead of print] PubMed PMID: 32287142.</p> | <p>No original article</p>              |
| <p>86: Curatola A, Ferretti S, Gatto A, Chiaretti A. Use of Handheld Transceiver for Hospital Healthcare Workers-Caregiver Communication During the Coronavirus disease 2019 (COVID-19) Outbreak in Pediatric Emergency Department. <i>Pediatr Infect Dis J.</i> 2020 Apr 13. doi: 10.1097/INF.0000000000002689. [Epub ahead of print] PubMed PMID: 32287053.</p>                                                                                                                                                                                                                                                                                                                                                                                                                                                                                                                                                                                                                                                                    | <p>No appropriate population sample</p> |

|                                                                                                                                                                                                                                                                                                                                                                                                                                     |                                         |
|-------------------------------------------------------------------------------------------------------------------------------------------------------------------------------------------------------------------------------------------------------------------------------------------------------------------------------------------------------------------------------------------------------------------------------------|-----------------------------------------|
| <p>87: Robbins E, Ilahi Z, Roth P. Febrile Infant: COVID-19 in Addition to the Usual Suspects. <i>Pediatr Infect Dis J.</i> 2020 Apr 13. doi: 10.1097/INF.0000000000002693. [Epub ahead of print] PubMed PMID: 32287052.</p>                                                                                                                                                                                                        | <p>No appropriate population sample</p> |
| <p>88: Parikh SR, Bly RA, Bonilla-Velez J, Dahl JP, Evans SS, Horn DL, Johnson KE, Manning SC, Ou HC, Pattisapu P, Perkins JA, Sie KCY. Pediatric Otolaryngology Divisional and Institutional Preparatory Response at Seattle Children's Hospital after COVID-19 Regional Exposure. <i>Otolaryngol Head Neck Surg.</i> 2020 Apr 14:194599820919748. doi: 10.1177/0194599820919748. [Epub ahead of print] PubMed PMID: 32286910.</p> | <p>No appropriate outcome</p>           |
| <p>89: Moradi B, Kazemi MA, Gity M. CT Findings of Pregnant Women With Coronavirus Disease (COVID-19) Pneumonia. <i>AJR Am J Roentgenol.</i> 2020 Apr 14:W1. doi:10.2214/AJR.20.23212. [Epub ahead of print] PubMed PMID: 32286871.90: Golberstein E, Wen H, Miller BF. Coronavirus Disease 2019 (COVID-19) and</p>                                                                                                                 | <p>No original article</p>              |
| <p>90: Golberstein E, Wen H, Miller BF. Coronavirus Disease 2019 (COVID-19) and Mental Health for Children and Adolescents. <i>JAMA Pediatr.</i> 2020 Apr 14. doi:10.1001/jamapediatrics.2020.1456. [Epub ahead of print] PubMed PMID: 32286618.</p>                                                                                                                                                                                | <p>No appropriate outcome</p>           |
| <p>91: Henry BM, de Oliveira MHS, Benoit S, Plebani M, Lippi G. Hematologic, biochemical and immune biomarker abnormalities associated with severe illness and mortality in coronavirus disease 2019 (COVID-19): a meta-analysis. <i>Clin Chem Lab Med.</i> 2020 Apr 10. pii: /j/cclm.ahead-of-print/cclm-2020-0369/cclm-2020-0369.xml. doi: 10.1515/cclm-2020-0369. [Epub ahead of print] Review. PubMed PMID: 32286245.</p>       | <p>No appropriate outcome</p>           |
| <p>92: Infantino M, Damiani A, Gobbi FL, Grossi V, Lari B, Macchia D, Casprini P, Veneziani F, Villalta D, Bizzaro N, Cappelletti P, Fabris M, Quartuccio L, Benucci M, Manfredi M. Serological Assays for SARS-CoV-2 Infectious Disease: Benefits, Limitations and</p>                                                                                                                                                             | <p>No appropriate outcome</p>           |

|                                                                                                                                                                                                                                                                                                                              |                                         |
|------------------------------------------------------------------------------------------------------------------------------------------------------------------------------------------------------------------------------------------------------------------------------------------------------------------------------|-----------------------------------------|
| <p>Perspectives. Isr Med Assoc J. 2020 Apr;22(4):203-210. PubMed PMID: 32286019.</p>                                                                                                                                                                                                                                         |                                         |
| <p>93: Cimolai N. Defining Protective Epitopes for COVID-19 Vaccination Models. JMed Virol. 2020 Apr 14. doi: 10.1002/jmv.25876. [Epub ahead of print] PubMed PMID: 32285942.</p>                                                                                                                                            | <p>No appropriate outcome</p>           |
| <p>94: Liu W, Wang J, Li W, Zhou Z, Liu S, Rong Z. Clinical characteristics of 19 neonates born to mothers with COVID-19. Front Med. 2020 Apr 13. doi:10.1007/s11684-020-0772-y. [Epub ahead of print] PubMed PMID: 32285380.</p>                                                                                            | <p>Included</p>                         |
| <p>95: Lodha R, Kabra SK. COVID-19: How to Prepare for the Pandemic? Indian JPediatr. 2020 Apr 13. doi: 10.1007/s12098-020-03293-0. [Epub ahead of print] PubMed PMID: 32285326.</p>                                                                                                                                         | <p>No original article</p>              |
| <p>96: Joseph Davey D, Bekker LG, Coates TJ, Myer L. Contracting HIV or Contracting SARS-CoV-2 (COVID-19) in Pregnancy? Balancing the Risks and Benefits. AIDS Behav. 2020 Apr 13. doi: 10.1007/s10461-020-02861-x. [Epub ahead of print] PubMed PMID: 32285221</p>                                                          | <p>No appropriate outcome</p>           |
| <p>97: Ambigapathy S, Rajahram GS, Shamsudin UK, Khoo EM, Cheah WK, Peariasamy KM, Goh PP, Khor SK. How should front-line general practitioners use personal protective equipment (PPE)? Malays Fam Physician. 2020 Mar 18;15(1):2-5. eCollection 2020. Review. PubMed PMID: 32284798; PubMed Central PMCID: PMC7136675.</p> | <p>No appropriate population sample</p> |
| <p>98: Wu JT, Leung K, Bushman M, Kishore N, Niehus R, de Salazar PM, Cowling BJ, Lipsitch M, Leung GM. Estimating clinical severity of COVID-19 from the transmission dynamics in Wuhan, China. Nat Med. 2020 Apr;26(4):506-510. doi:10.1038/s41591-020-0822-7. Epub 2020 Mar 19. PubMed PMID: 32284616.</p>                | <p>No appropriate outcome</p>           |

|                                                                                                                                                                                                                                                                                                                                                                                                                                  |                                         |
|----------------------------------------------------------------------------------------------------------------------------------------------------------------------------------------------------------------------------------------------------------------------------------------------------------------------------------------------------------------------------------------------------------------------------------|-----------------------------------------|
| <p>99: Xu Y, Li X, Zhu B, Liang H, Fang C, Gong Y, Guo Q, Sun X, Zhao D, Shen J, Zhang H, Liu H, Xia H, Tang J, Zhang K, Gong S. Characteristics of pediatric SARS-CoV-2 infection and potential evidence for persistent fecal viral shedding. <i>Nat Med.</i> 2020 Apr;26(4):502-505. doi: 10.1038/s41591-020-0817-4. Epub 2020 Mar 13. PubMed PMID: 32284613.</p>                                                              | <p>No appropriate outcome</p>           |
| <p>100: Mishra D. COVID-19 and Indian Pediatrics. <i>Indian Pediatr.</i> 2020 Apr 15;57(4):287. PubMed PMID: 32284470.</p>                                                                                                                                                                                                                                                                                                       | <p>No appropriate population sample</p> |
| <p>101: Body R, Carlton E, Carley S, Dawood M, Leech C, Smith SS, Weber EJ. Global crisis: EM and EMJ respond. <i>Emerg Med J.</i> 2020 Apr 13. pii: emermed-2020-209679. doi: 10.1136/emered-2020-209679. [Epub ahead of print]</p>                                                                                                                                                                                             | <p>No appropriate population sample</p> |
| <p>102: Helmers A. Stability and Viability of SARS-CoV-2. <i>N Engl J Med.</i> 2020 Apr 13;382. pii: 10.1056/NEJMc2007942#sa4. doi: 10.1056/NEJMc2007942. [Epub ahead of print] PubMed PMID: 32283578.</p>                                                                                                                                                                                                                       | <p>No appropriate outcome</p>           |
| <p>103: Hedrich CM. COVID-19 - Considerations for the paediatric rheumatologist. <i>Clin Immunol.</i> 2020 Apr 10;214:108420. doi: 10.1016/j.clim.2020.108420. [Epub ahead of print] Review. PubMed PMID: 32283324; PubMed Central PMCID: PMC7151358.</p>                                                                                                                                                                        | <p>No appropriate population sample</p> |
| <p>104: Karami P, Naghavi M, Feyzi A, Aghamohammadi M, Novin MS, Mobaien A, Qorbanisani M, Karami A, Norooznezhad AH. Mortality of a pregnant patient diagnosed with COVID-19: A case report with clinical, radiological, and histopathological findings. <i>Travel Med Infect Dis.</i> 2020 Apr 11:101665. doi: 10.1016/j.tmaid.2020.101665. [Epub ahead of print] PubMed PMID: 32283217; PubMed Central PMCID: PMC7151464.</p> | <p>Included</p>                         |

|                                                                                                                                                                                                                                                                                                                                                                                                                                                                                                                |                                  |
|----------------------------------------------------------------------------------------------------------------------------------------------------------------------------------------------------------------------------------------------------------------------------------------------------------------------------------------------------------------------------------------------------------------------------------------------------------------------------------------------------------------|----------------------------------|
| <p>105: Hamadani M, Zhang MJ, Tang XY, Fei M, Brunstein C, Chhabra S, D'Souza A, Milano F, Phelan R, Saber W, Shaw BE, Weisdorf D, Devine SM, Horowitz MM. Graftcryopreservation does not impact overall survival allogeneic hematopoietic celltransplantation using post-transplant cyclophosphamide for GVHD prophylaxis. BiolBlood Marrow Transplant. 2020 Apr 10. pii: S1083-8791(20)30209-3. doi:10.1016/j.bbmt.2020.04.001. [Epub ahead of print] PubMed PMID: 32283185.</p>                             | No appropriate population sample |
| <p>106: Ye Q, Wang B, Mao J. The pathogenesis and treatment of the `Cytokine Storm' in COVID-19. J Infect. 2020 Apr 10. pii: S0163-4453(20)30165-1. doi:10.1016/j.jinf.2020.03.037. [Epub ahead of print] Review. PubMed PMID: 32283152.</p>                                                                                                                                                                                                                                                                   | No appropriate outcome           |
| <p>107: Xing Y, Ni W, Wu Q, Li W, Li G, Wang W, Tong J, Song X, Wong GWK, Xing Q. Dynamics of Faecal SARS-CoV-2 in Infected Children during the Convalescent Phase. J Infect. 2020 Apr 10. pii: S0163-4453(20)30177-8. doi:10.1016/j.jinf.2020.03.049. [Epub ahead of print] PubMed PMID: 32283149.</p>                                                                                                                                                                                                        | No appropriate outcome           |
| <p>108: Ashokka B, Loh MH, Tan CH, Su LL, Young BE, Lye DC, Biswas A, E Illanes S, Choolani M. Care of the Pregnant Woman with COVID-19 in Labor and Delivery: Anesthesia, Emergency cesarean delivery, Differential diagnosis in the acutely ill parturient, Care of the newborn, and Protection of the healthcare personnel. Am J Obstet Gynecol. 2020 Apr 10. pii: S0002-9378(20)30430-0. doi:10.1016/j.ajog.2020.04.005. [Epub ahead of print] PubMed PMID: 32283073; PubMedCentral PMCID: PMC7151436.</p> | No original article              |
| <p>109: Cheng MP, Papenburg J, Desjardins M, Kanjilal S, Quach C, Libman M, Dittrich S, Yansouni CP. Diagnostic Testing for Severe Acute Respiratory Syndrome-Related Coronavirus-2: A Narrative Review. Ann Intern Med. 2020 Apr 13. doi:10.7326/M20-</p>                                                                                                                                                                                                                                                     | No original article              |

|                                                                                                                                                                                                                                                                                                                                                                  |                                  |
|------------------------------------------------------------------------------------------------------------------------------------------------------------------------------------------------------------------------------------------------------------------------------------------------------------------------------------------------------------------|----------------------------------|
| 1301. [Epub ahead of print] PubMed PMID: 32282894.                                                                                                                                                                                                                                                                                                               |                                  |
| 110: Wang H, Li Y, Wang F, Du H, Lu X. Rehospitalization of a Recovered Coronavirus Disease 19 (COVID-19) Child With Positive Nucleic Acid Detection. <i>Pediatr Infect Dis J</i> . 2020 Apr 9. doi: 10.1097/INF.0000000000002690. [Epub ahead of print] PubMed PMID: 32282658.                                                                                  | No appropriate population sample |
| 111: Berg EA, Picoraro JA, Miller SD, Srinath A, Franciosi JP, Hayes CE, Farrell PR, Cole CR, LeLeiko NS. COVID-19 - A Guide to Rapid Implementation of Telehealth Services: A Playbook for the Pediatric Gastroenterologist. <i>J Pediatr Gastroenterol Nutr</i> . 2020 Apr 10. doi: 10.1097/MPG.0000000000002749. [Epub ahead of print] PubMed PMID: 32282628. | No appropriate outcome           |
| 112: Verstraete SG, Sola AM, Ali SA. Telemedicine for Pediatric Inflammatory bowel disease in the Era of COVID-19. <i>J Pediatr Gastroenterol Nutr</i> . 2020 Apr 8. doi: 10.1097/MPG.0000000000002747. [Epub ahead of print] PubMed PMID: 32282624.                                                                                                             | No appropriate outcome           |
| 113: Lippi G, de Oliveira MHS, Henry BM. Chronic liver disease is not associated with severity or mortality in Coronavirus disease 2019 (COVID-19): a pooled analysis. <i>Eur J Gastroenterol Hepatol</i> . 2020 Apr 10. doi:10.1097/MEG.0000000000001742. [Epub ahead of print] PubMed PMID: 32282549.                                                          | No appropriate population sample |
| 114: Pathak EB, Salemi JL, Sobers N, Menard J, Hambleton IR. COVID-19 in Children in the United States: Intensive Care Admissions, Estimated Total Infected, and Projected Numbers of Severe Pediatric Cases in 2020. <i>J Public Health Manag Pract</i> . 2020 Apr 10. doi: 10.1097/PHH.0000000000001190. [Epub ahead of print] PubMed PMID: 32282440.          | No appropriate population sample |



|                                                                                                                                                                                                                                                                                                                                                                                                                                                                                               |                                         |
|-----------------------------------------------------------------------------------------------------------------------------------------------------------------------------------------------------------------------------------------------------------------------------------------------------------------------------------------------------------------------------------------------------------------------------------------------------------------------------------------------|-----------------------------------------|
| <p>115: DeBaun MR. Initiating adjunct low dose-hydroxyurea therapy for strokeprevention in children with SCA during the COVID-19 pandemic. <i>Blood</i>. 2020 Apr 13.pii: blood.2020005992. doi: 10.1182/blood.2020005992. [Epub ahead of print]PubMed PMID: 32282033.</p>                                                                                                                                                                                                                    | <p>No appropriate population sample</p> |
| <p>116: Syal K. COVID-19: Herd Immunity and Convalescent Plasma Transfer Therapy. <i>J Med Virol</i>. 2020 Apr 13. doi: 10.1002/jmv.25870. [Epub ahead of print] PubMedPMID: 32281679.</p>                                                                                                                                                                                                                                                                                                    | <p>No appropriate outcome</p>           |
| <p>117: Schiariti V. Prawa człowieka dzieci niepełnosprawnych w sytuacjachkryzysowych: wyzwanie COVID-19. <i>Dev Med Child Neurol</i>. 2020 Apr 13. doi:10.1111/dmcn.14544. [Epub ahead of print] PubMed PMID: 32281649.</p>                                                                                                                                                                                                                                                                  | <p>No appropriate population sample</p> |
| <p>118: Bradbury-Jones C, Isham L. The pandemic paradox: the consequences ofCOVID-19 on domestic violence. <i>J Clin Nurs</i>. 2020 Apr 12. doi: 10.1111/jocn.15296.[Epub ahead of print] PubMed PMID: 32281158.</p>                                                                                                                                                                                                                                                                          | <p>No appropriate population sample</p> |
| <p>119: Caccialanza R, Laviano A, Lobascio F, Montagna E, Bruno R, Ludovisi S,Corsico AG, Di Sabatino A, Belliato M, Calvi M, Iacona I, Grugnetti G, Bonadeo E,Muzzi A, Cereda E. Early nutritional supplementation in non-critically illpatients hospitalized for the 2019 novel coronavirus disease (COVID-19):Rationale and feasibility of a shared pragmatic protocol. <i>Nutrition</i>. 2020 Apr3:110835. doi: 10.1016/j.nut.2020.110835. [Epub ahead of print] PubMed PMID:32280058</p> | <p>No appropriate population sample</p> |
| <p>120: Khan S, Peng L, Siddique R, Nabi G, Nawsherwan, Xue M, Liu J, Han G. Impact of COVID-19 infection on pregnancy outcomes and the risk of maternal-to-neonatal intrapartum transmission of COVID-19 during natural birth. <i>Infect Control HospEpidemiol</i>. 2020 Mar 19:1-3. doi: 10.1017/ice.2020.84. [Epub ahead of</p>                                                                                                                                                            | <p>Included</p>                         |

|                                                                                                                                                                                                                                                                                                                                                                                                        |                                         |
|--------------------------------------------------------------------------------------------------------------------------------------------------------------------------------------------------------------------------------------------------------------------------------------------------------------------------------------------------------------------------------------------------------|-----------------------------------------|
| <p>print]PubMed PMID: 32279693; PubMed Central PMCID: PMC7156579.</p>                                                                                                                                                                                                                                                                                                                                  |                                         |
| <p>121: Huang T, Guo Y, Li S, Zheng Y, Lei L, Zeng X, Zhong Q, Liu Y, Liu L. Application and effects of fever screening system in the prevention of nosocomial infection in the only designated hospital of coronavirus disease 2019 (COVID-19) in Shenzhen, China. <i>Infect Control Hosp Epidemiol.</i> 2020 Apr 13:1-10. doi:10.1017/ice.2020.119. [Epub ahead of print] PubMed PMID: 32279675.</p> | <p>No appropriate outcome</p>           |
| <p>122: Sarialioglu F, Belen Apak FB, Haberal M. Can Hepatitis A Vaccine Provide Protection Against COVID-19? <i>Exp Clin Transplant.</i> 2020 Apr;18(2):141-143. doi:10.6002/ect.2020.0109. Review. PubMed PMID: 32279655.</p>                                                                                                                                                                        | <p>No appropriate outcome</p>           |
| <p>123: Bartiromo M, Borchi B, Botta A, Bagalà A, Lugli G, Tilli M, Cavallo A, Xhaferi B, Cutruzzulà R, Vaglio A, Bresci S, Larti A, Bartoloni A, Cirami C. Threatening drug-drug interaction in a kidney transplant patient with Coronavirus Disease 2019 (COVID-19). <i>Transpl Infect Dis.</i> 2020 Apr 12. doi: 10.1111/tid.13286. [Epub ahead of print] PubMed PMID: 32279418.</p>                | <p>No appropriate population sample</p> |
| <p>124: Dayal D. We urgently need guidelines for managing COVID-19 in children with comorbidities. <i>Acta Paediatr.</i> 2020 Apr 12. doi: 10.1111/apa.15304. [Epub ahead of print] PubMed PMID: 32279351.</p>                                                                                                                                                                                         | <p>No original article</p>              |
| <p>125: Matthai J, Shanmugam N, Sobhan P; Indian Society Of Pediatric Gastroenterology, Hepatology And Nutrition; Pediatric Gastroenterology Chapter Of Indian Academy Of Pediatrics . Coronavirus Disease (COVID-19) and the Gastrointestinal System in Children. <i>Indian Pediatr.</i> 2020 Apr 12. pii:S097475591600162. [Epub ahead of print] PubMed PMID: 32279064.</p>                          | <p>No appropriate outcome</p>           |

|                                                                                                                                                                                                                                                                                                                                                                                                                                                      |                                  |
|------------------------------------------------------------------------------------------------------------------------------------------------------------------------------------------------------------------------------------------------------------------------------------------------------------------------------------------------------------------------------------------------------------------------------------------------------|----------------------------------|
| <p>126: Henry BM, Lippi G. Poor survival with extracorporeal membrane oxygenation in acute respiratory distress syndrome (ARDS) due to coronavirus disease 2019(COVID-19): Pooled analysis of early reports. <i>J Crit Care.</i> 2020 Apr 1;58:27-28.doi: 10.1016/j.jcrc.2020.03.011. [Epub ahead of print] PubMed PMID: 32279018;PubMed Central PMCID: PMC7118619.</p>                                                                              | No appropriate outcome           |
| <p>127: Penel N, Bonvalot S, Minard V, Orbach D, Gouin F, Corradini N, Brahmi M, Marec-Bérard P, Briand S, Gaspar N, Llacer C, Carrère S, Dufresne A, Le Cesne A, Blay JY. French Sarcoma Group proposals for management of sarcoma patients during COVID-19 outbreak. <i>Ann Oncol.</i> 2020 Apr 9. pii: S0923-7534(20)36413-9. doi:10.1016/j.annonc.2020.03.308. [Epub ahead of print] PubMed PMID: 32278878; PubMedCentral PMCID: PMC7144615.</p> | No appropriate population sample |
| <p>128: Lancaster EM, Sosa JA, Sammann A, Pierce L, Shen W, Conte M, Wick E. Rapid Response of an Academic Surgical Department to the COVID-19 Pandemic: Implications for Patients, Surgeons, and the Community. <i>J Am Coll Surg.</i> 2020 Apr 9. pii: S1072-7515(20)30312-4. doi: 10.1016/j.jamcollsurg.2020.04.007. [Epub ahead of print] PubMed PMID: 32278726.</p>                                                                             | No appropriate outcome           |
| <p>129: Saccone G, Carbone FI, Zullo F. The novel coronavirus (2019-nCoV) in pregnancy: What we need to know. <i>Eur J Obstet Gynecol Reprod Biol.</i> 2020 Apr 2. pii: S0301-2115(20)30174-3. doi: 10.1016/j.ejogrb.2020.04.006. [Epub ahead of print] PubMed PMID: 32278619; PubMed Central PMCID: PMC7131203.</p>                                                                                                                                 | No original article              |
| <p>130: Leva E, Morandi A, Sartori A, Macchini F, Berrettini A, Manzoni G. Correspondence from Northern Italy about our experience with COVID-19. <i>J Pediatr Surg.</i> 2020 Apr 1. pii: S0022-3468(20)30252-9. doi:10.1016/j.jpedsurg.2020.03.028. [Epub ahead of print] PubMed PMID: 32278542.</p>                                                                                                                                                | No original article              |

|                                                                                                                                                                                                                                                                                                                                                                                                                                                                                                                                                                                                                                                                                                                                                                                                                                                                                                                                                                                                                                                                                                                                 |                                         |
|---------------------------------------------------------------------------------------------------------------------------------------------------------------------------------------------------------------------------------------------------------------------------------------------------------------------------------------------------------------------------------------------------------------------------------------------------------------------------------------------------------------------------------------------------------------------------------------------------------------------------------------------------------------------------------------------------------------------------------------------------------------------------------------------------------------------------------------------------------------------------------------------------------------------------------------------------------------------------------------------------------------------------------------------------------------------------------------------------------------------------------|-----------------------------------------|
| <p>131: Gligorov J, Bachelot T, Pierga JY, Antoine EC, Balleyguier C, Barranger E, Belkacemi Y, Bonnefoi H, Bidard FC, Ceugnart L, Classe JM, Cottu P, Coutant C, Cutuli B, Dalenc F, Darai E, Dieras V, Dohollou N, Giacchetti S, Goncalves A, Hardy-Bessard AC, Houvenaeghel G, Jacquin JP, Jacot W, Levy C, Mathelin C, Nisand I, Petit T, Petit T, Poncelet E, Rivera S, Rouzier R, Salmon R, Scotté F, Spano JP, Uzan C, Zelek L, Spielmann M, Penault-Llorca F, Namer M, Delaloge S. [COVID-19 and people followed for breast cancer: French guidelines for clinical practice of Nice-St Paul de Vence, in collaboration with the Collège Nationale des Gynécologues et Obstétriciens Français (CNGOF), the Société d'Imagerie de la FEMme (SIFEM), the Société Française de Chirurgie Oncologique (SFCO), the Société Française de Sénologie et Pathologie Mammaire (SFSPM) and the French Breast Cancer Intergroup-UNICANCER (UCBG)]. Bull Cancer. 2020 Apr 1. pii:S0007-4551(20)30159-4. doi: 10.1016/j.bulcan.2020.03.008. [Epub ahead of print] French. PubMed PMID: 32278467; PubMed Central PMCID: PMC7118684.</p> | <p>No appropriate population sample</p> |
| <p>132: Lazzerini M, Barbi E, Apicella A, Marchetti F, Cardinale F, Trobia G. Delayed access or provision of care in Italy resulting from fear of COVID-19. Lancet Child Adolesc Health. 2020 Apr 9. pii: S2352-4642(20)30108-5. doi:10.1016/S2352-4642(20)30108-5. [Epub ahead of print] PubMed PMID: 32278365.</p>                                                                                                                                                                                                                                                                                                                                                                                                                                                                                                                                                                                                                                                                                                                                                                                                            | <p>No appropriate outcome</p>           |
| <p>133: Martinez-Portilla RJ, Goncé A, Hawkins-Villarreal A, Figueras F. A Spanish-translated clinical algorithm for management of suspected SARS-CoV-2 infection in pregnant women. Lancet Infect Dis. 2020 Apr 9. pii:S1473-3099(20)30285-1. doi: 10.1016/S1473-3099(20)30285-1. [Epub ahead of print] PubMed PMID: 32278360; PubMed Central PMCID: PMC7158943.</p>                                                                                                                                                                                                                                                                                                                                                                                                                                                                                                                                                                                                                                                                                                                                                           | <p>No original article</p>              |
| <p>134: Moazzami B, Razavi-Khorasani N, Dooghaie Moghadam A, Farokhi E, Rezaei N. COVID-19 and telemedicine: Immediate action required for maintaining healthcare providers well-being. J Clin Virol.</p>                                                                                                                                                                                                                                                                                                                                                                                                                                                                                                                                                                                                                                                                                                                                                                                                                                                                                                                       | <p>No appropriate outcome</p>           |

|                                                                                                                                                                                                                                                                                                                                                                                                                                                                                                                                   |                                  |
|-----------------------------------------------------------------------------------------------------------------------------------------------------------------------------------------------------------------------------------------------------------------------------------------------------------------------------------------------------------------------------------------------------------------------------------------------------------------------------------------------------------------------------------|----------------------------------|
| <p>2020 Apr 4;126:104345.<br/>doi:10.1016/j.jcv.2020.104345. [Epub ahead of print] PubMed PMID: 32278298; PubMedCentral PMCID: PMC7129277.</p>                                                                                                                                                                                                                                                                                                                                                                                    |                                  |
| <p>135: Frauenfelder C, Butler C, Hartley B, Cochrane L, Jephson C, Nash R, Hewitt R, Albert D, Wyatt M, Hall A. Practical insights for paediatric otolaryngologysurgical cases and performing microlaryngobronchoscopy during the COVID-19 pandemic. <i>Int J Pediatr Otorhinolaryngol.</i> 2020 Mar 30;134:110030. doi:10.1016/j.ijporl.2020.110030. [Epub ahead of print] PubMed PMID: 32278168; PubMedCentral PMCID: PMC7142686.</p>                                                                                          | No appropriate outcome           |
| <p>136: Khan S, Jun L, Nawsherwan, Siddique R, Li Y, Han G, Xue M, Nabi G, Liu J. Association of COVID-19 infection with pregnancy outcomes in healthcare workers and general women. <i>Clin Microbiol Infect.</i> 2020 Apr 8. pii: S1198-743X(20)30180-4. doi: 10.1016/j.cmi.2020.03.034. [Epub ahead of print] PubMed PMID: 32278081; PubMed Central PMCID: PMC7141623.</p>                                                                                                                                                     | Overlapping data                 |
| <p>137: Shah PS, Diambomba Y, Acharya G, Morris SK, Bitnun A. Classification system and case definition for SARS-CoV-2 infection in pregnant women, fetuses, and neonates. <i>Acta Obstet Gynecol Scand.</i> 2020 Apr 11. doi: 10.1111/aogs.13870. [Epub ahead of print] PubMed PMID: 32277845.</p>                                                                                                                                                                                                                               | No original article              |
| <p>138: Danis K, Epaulard O, Bénet T, Gaymard A, Campoy S, Bothelo-Nevers E, Bouscambert-Duchamp M, Spaccaferri G, Ader F, Mailles A, Boudalaa Z, Tolsma V, Berra J, Vaux S, Forestier E, Landelle C, Fougere E, Thabuis A, Berthelot P, Veil R, Levy-Bruhl D, Chidiac C, Lina B, Coignard B, Saura C; Investigation Team. Cluster of coronavirus disease 2019 (Covid-19) in the French Alps, 2020. <i>Clin Infect Dis.</i> 2020 Apr 11. pii: ciaa424. doi: 10.1093/cid/ciaa424. [Epub ahead of print] PubMed PMID: 32277759.</p> | No appropriate population sample |

|                                                                                                                                                                                                                                                                                                                                                  |                                         |
|--------------------------------------------------------------------------------------------------------------------------------------------------------------------------------------------------------------------------------------------------------------------------------------------------------------------------------------------------|-----------------------------------------|
| <p>139: Meena J, Kumar J. Fecal Shedding of SARS CoV-2: Implications for Disease Spread and Quarantine. <i>Indian Pediatr.</i> 2020 Apr 11. pii: S097475591600160. [Epub ahead of print] PubMed PMID: 32277746.</p>                                                                                                                              | <p>No appropriate outcome</p>           |
| <p>140: Wilson CG, Ramage M, Fagan EB. A Primary Care Response to COVID-19 for Patients with an Opioid Use Disorder. <i>J Rural Health.</i> 2020 Apr 11. doi:10.1111/jrh.12438. [Epub ahead of print] PubMed PMID: 32277732.</p>                                                                                                                 | <p>No appropriate population sample</p> |
| <p>141: Yousefzadegan S, Rezaei N. Case Report: Death Due to Novel Coronavirus Disease (COVID-19) in Three Brothers. <i>Am J Trop Med Hyg.</i> 2020 Apr 10. doi:10.4269/ajtmh.20-0240. [Epub ahead of print] PubMed PMID: 32277694.</p>                                                                                                          | <p>No appropriate outcome</p>           |
| <p>142: Deprest J, Van Ranst M, Lannoo L, Bredaki E, Ryan G, David A, Richter J, Van Mieghem T. Feto-placental surgeries during the covid-19 pandemic: starting the discussion. <i>Prenat Diagn.</i> 2020 Apr 11. doi: 10.1002/pd.5702. [Epub ahead of print] PubMed PMID: 32277490.</p>                                                         | <p>No appropriate outcome</p>           |
| <p>144: Liu H, He X, Wang Y, Zhou S, Zhang D, Zhu J, He Q, Zhu Z, Li G, Sun L, Wang J, Cheng G, Liu Z, Lau G. Management of COVID-19 in patients after liver transplantation: Beijing working party for liver transplantation. <i>Hepatol Int.</i> 2020 Apr 10. doi: 10.1007/s12072-020-10043-z. [Epub ahead of print] PubMed PMID: 32277387</p> | <p>No appropriate population sample</p> |
| <p>145: Mimouni F, Lakshminrusimha S, Pearlman SA, Raju T, Gallagher PG, Mendlovic J. Perinatal aspects on the covid-19 pandemic: a practical resource for perinatal-neonatal specialists. <i>J Perinatol.</i> 2020 Apr 10. doi:10.1038/s41372-020-0665-6. [Epub ahead of print] Review. PubMed PMID: 32277162.</p>                              | <p>No original article</p>              |

|                                                                                                                                                                                                                                                                                                                                                                                                |                                  |
|------------------------------------------------------------------------------------------------------------------------------------------------------------------------------------------------------------------------------------------------------------------------------------------------------------------------------------------------------------------------------------------------|----------------------------------|
| <p>146: Solnica A, Barski L, Jotkowitz A. Allocation of scarce resources during the COVID-19 pandemic: a Jewish ethical perspective. <i>J Med Ethics</i>. 2020 Apr 10. pii: medethics-2020-106242. doi: 10.1136/medethics-2020-106242. [Epub ahead of print] PubMed PMID: 32277021.</p>                                                                                                        | No appropriate outcome           |
| <p>147: Lee CY, Wang PS, Huang YD, Lin YC, Hsu YN, Chen SC. Evacuation of quarantine-qualified nationals from Wuhan for COVID-19 outbreak - Taiwan experience. <i>J Microbiol Immunol Infect</i>. 2020 Apr 1. pii: S1684-1182(20)30083-9. doi: 10.1016/j.jmii.2020.03.023. [Epub ahead of print] PubMed PMID: 32276849; PubMed Central PMCID: PMC7118679.</p>                                  | No appropriate outcome           |
| <p>148: Xing YH, Ni W, Wu Q, Li WJ, Li GJ, Wang WD, Tong JN, Song XF, Wing-Kin Wong G, Xing QS. Prolonged viral shedding in feces of pediatric patients with coronavirus disease 2019. <i>J Microbiol Immunol Infect</i>. 2020 Mar 28. pii: S1684-1182(20)30081-5. doi: 10.1016/j.jmii.2020.03.021. [Epub ahead of print] Review. PubMed PMID: 32276848; PubMed Central PMCID: PMC7141453.</p> | No appropriate population sample |
| <p>149: Dipasquale V, Cucchiara S, Martinelli M, Miele E, Aloisi M, Romano C. Challenges in paediatric inflammatory bowel diseases in the COVID-19 time. <i>Dig Liver Dis</i>. 2020 Apr 7. pii: S1590-8658(20)30117-1. doi: 10.1016/j.dld.2020.03.015. [Epub ahead of print] PubMed PMID: 32276846; PubMed Central PMCID: PMC7141464.</p>                                                      | No appropriate outcome           |
| <p>150: Wilson AN, Ravaldi C, Scoullar MJL, Vogel JP, Szabo RA, Fisher JRW, Homer CSE. Caring for the carers: Ensuring the provision of quality maternity care during a global pandemic. <i>Women Birth</i>. 2020 Apr 8. pii: S1871-5192(20)30212-2. doi: 10.1016/j.wombi.2020.03.011. [Epub ahead of print] PubMed PMID: 32276778; PubMed Central PMCID: PMC7141547.</p>                      | No appropriate outcome           |

|                                                                                                                                                                                                                                                                                                                                                                                       |                                         |
|---------------------------------------------------------------------------------------------------------------------------------------------------------------------------------------------------------------------------------------------------------------------------------------------------------------------------------------------------------------------------------------|-----------------------------------------|
| <p>151: Casamassimo PS, Townsend JA, Litch CS. Pediatric Dentistry During and After COVID-19. <i>Pediatr Dent</i>. 2020 Mar 15;42(2):87-90. PubMed PMID: 32276673.</p>                                                                                                                                                                                                                | <p>No appropriate population sample</p> |
| <p>187: Li L, Zhang B, He B, Gong Z, Chen X. Critical patients with coronavirusdisease 2019: Risk factors and outcome nomogram. <i>J Infect</i>. 2020 Apr 6. pii:S0163-4453(20)30153-5. doi: 10.1016/j.jinf.2020.03.025. [Epub ahead of print]PubMed PMID: 32272120.</p>                                                                                                              | <p>No appropriate population sample</p> |
| <p>278: Eccleston C, Blyth FM, Dear BF, Fisher EA, Keefe FJ, Lynch ME, Palermo TM, Reid MC, Williams ACC. Managing patients with chronic pain during the COVID-19outbreak: considerations for the rapid introduction of remotely supported(eHealth) pain management services. <i>Pain</i>. 2020 May;161(5):889-893. doi:10.1097/j.pain.0000000000001885. PubMed PMID: 32251203.</p>   | <p>No appropriate population sample</p> |
| <p>1: Palatnik A, McIntosh JJ. Protecting Labor and Delivery Personnel from COVID-19during the Second Stage of Labor. <i>Am J Perinatol</i>. 2020 Apr 10. doi:10.1055/s-0040-1709689. [Epub ahead of print] PubMed PMID: 32276282.</p>                                                                                                                                                | <p>No original article</p>              |
| <p>2: Wellons JC, Grant G, Krieger MD, Ragheb J, Robinson S, Weprin B, Ojemann J. Editorial. Early lessons in the management of COVID-19 for the pediatricneurosurgical community from the leadership of the American Society of Pediatric Neurosurgeons. <i>J Neurosurg Pediatr</i>. 2020 Apr 10:1-2. doi:10.3171/2020.3.PEDS20215. [Epub ahead of print] PubMed PMID: 32276256.</p> | <p>No appropriate outcome</p>           |
| <p>3: Sawalha AH, Zhao M, Coit P, Lu Q. Epigenetic dysregulation of ACE2 andinterferon-regulated genes might suggest increased COVID-19 susceptibility andseverity in lupus patients. <i>Clin Immunol</i>. 2020 Apr 7:108410. doi:10.1016/j.clim.2020.108410. [Epub ahead of print] PubMed PMID: 32276140.</p>                                                                        | <p>No appropriate population sample</p> |



|                                                                                                                                                                                                                                                                                                                                                                                                                                                                                                                                                                                                                            |                                         |
|----------------------------------------------------------------------------------------------------------------------------------------------------------------------------------------------------------------------------------------------------------------------------------------------------------------------------------------------------------------------------------------------------------------------------------------------------------------------------------------------------------------------------------------------------------------------------------------------------------------------------|-----------------------------------------|
| <p>4: Yan C, Cui J, Huang L, Du B, Chen L, Xue G, Li S, Zhang W, Zhao L, Sun Y, Yao H, Li N, Zhao H, Feng Y, Liu S, Zhang Q, Liu D, Yuan J. Rapid and visual detection of 2019 novel coronavirus (SARS-CoV-2) by a reverse transcription loop-mediated isothermal amplification assay. <i>Clin Microbiol Infect.</i> 2020 Apr 7. pii: S1198-743X(20)30186-5. doi: 10.1016/j.cmi.2020.04.001. [Epub ahead of print] PubMed PMID: 32276116.</p>                                                                                                                                                                              | <p>No appropriate outcome</p>           |
| <p>5: Rubin GD, Ryerson CJ, Haramati LB, Sverzellati N, Kanne JP, Raouf S, Schluger NW, Volpi A, Yim JJ, Martin IBK, Anderson DJ, Kong C, Altes T, Bush A, Desai SR, Goldin J, Goo JM, Humbert M, Inoue Y, Kauczor HU, Luo F, Mazzone PJ, Prokop M, Remy-Jardin M, Richeldi L, Schaefer-Prokop CM, Tomiyama N, Wells AU, Leung AN. The Role of Chest Imaging in Patient Management during the COVID-19 Pandemic: A Multinational Consensus Statement from the Fleischner Society. <i>Chest.</i> 2020 Apr 7. pii: S0012-3692(20)30673-5. doi: 10.1016/j.chest.2020.04.003. [Epub ahead of print] PubMed PMID: 32275978.</p> | <p>No original article</p>              |
| <p>6: Van Lancker W, Parolin Z. COVID-19, school closures, and child poverty: a social crisis in the making. <i>Lancet Public Health.</i> 2020 Apr 7. pii: S2468-2667(20)30084-0. doi: 10.1016/S2468-2667(20)30084-0. [Epub ahead of print] PubMed PMID: 32275858.</p>                                                                                                                                                                                                                                                                                                                                                     | <p>No appropriate outcome</p>           |
| <p>7: Joob B, Wiwanitkit V. COVID-19, School Closings and Weight Gain. <i>Obesity (Silver Spring).</i> 2020 Apr 10. doi: 10.1002/oby.22825. [Epub ahead of print] PubMed PMID: 32275803.</p>                                                                                                                                                                                                                                                                                                                                                                                                                               | <p>No appropriate outcome</p>           |
| <p>8: Dario Mandato V, Aguzzoli L. Management of ovarian cancer during the COVID-19 pandemic. <i>Int J Gynaecol Obstet.</i> 2020 Apr 10. doi: 10.1002/ijgo.13167. [Epub ahead of print] PubMed PMID: 32275775.</p>                                                                                                                                                                                                                                                                                                                                                                                                         | <p>No appropriate population sample</p> |

|                                                                                                                                                                                                                                                                                                                                                                             |                               |
|-----------------------------------------------------------------------------------------------------------------------------------------------------------------------------------------------------------------------------------------------------------------------------------------------------------------------------------------------------------------------------|-------------------------------|
| <p>9: Hotez PJ, Bottazzi ME, Singh SK, Brindley PJ, Kamhawi S. Will COVID-19 become the next neglected tropical disease? PLoS Negl Trop Dis. 2020 Apr10;14(4):e0008271. doi: 10.1371/journal.pntd.0008271. eCollection 2020 Apr.PubMed PMID: 32275667.</p>                                                                                                                  | <p>No appropriate outcome</p> |
| <p>10: Tavazzi G, Pellegrini C, Maurelli M, Belliato M, Sciutti F, Bottazzi A, Sepe PA, Resasco T, Camporotondo R, Bruno R, Baldanti F, Paolucci S, Pelenghi S, IottiGA, Mojoli F, Arbustini E. Myocardial localization of coronavirus in COVID-19cardiogenic shock. Eur J Heart Fail. 2020 Apr 10. doi: 10.1002/ejhf.1828. [Epubahead of print] PubMed PMID: 32275347.</p> | <p>No appropriate outcome</p> |
| <p>11: Hartley DM, Perencevich EN. Public Health Interventions for COVID-19:Emerging Evidence and Implications for an Evolving Public Health Crisis. JAMA.2020 Apr 10. doi: 10.1001/jama.2020.5910. [Epub ahead of print] PubMed PMID:32275299</p>                                                                                                                          | <p>No original article</p>    |
| <p>12: Pan A, Liu L, Wang C, Guo H, Hao X, Wang Q, Huang J, He N, Yu H, Lin X, WeiS, Wu T. Association of Public Health Interventions With the Epidemiology of the COVID-19 Outbreak in Wuhan, China. JAMA. 2020 Apr 10. doi:10.1001/jama.2020.6130. [Epub ahead of print] PubMed PMID: 32275295.</p>                                                                       | <p>No appropriate outcome</p> |
| <p>13: Sinha A. King Lear Under COVID-19 Lockdown. JAMA. 2020 Apr 10. doi:10.1001/jama.2020.6186. [Epub ahead of print] PubMed PMID: 32275290.</p>                                                                                                                                                                                                                          | <p>No original article</p>    |
| <p>14: Rabaan AA, Al-Ahmed SH, Haque S, Sah R, Tiwari R, Malik YS, Dhama K, YattooMI, Bonilla-Aldana DK, Rodriguez-Morales AJ. Exploring the genetics, ecology ofSARS-CoV-2 and climatic factors as possible control strategies against COVID-19. Infez Med. 2020 Ahead of print Jun 1;28(2):174-184. PubMed PMID: 32275259.</p>                                            | <p>No original article</p>    |

|                                                                                                                                                                                                                                                                                                                                                                                                                                                                      |                                  |
|----------------------------------------------------------------------------------------------------------------------------------------------------------------------------------------------------------------------------------------------------------------------------------------------------------------------------------------------------------------------------------------------------------------------------------------------------------------------|----------------------------------|
| <p>15: Cossarizza A, Gibellini L, De Biasi S, Lo Tartaro D, Mattioli M, Paolini A, Fidanza L, Bellinazzi C, Borella R, Castaniere I, Meschiari M, Sita M, Manco G, Clini E, Gelmini R, Girardis M, Guaraldi G, Mussini C. Handling and Processing of Blood Specimens from Patients with COVID-19 for Safe Studies on Cell Phenotype and Cytokine Storm. <i>Cytometry A</i>. 2020 Apr 10. doi: 10.1002/cyto.a.24009. [Epub ahead of print] PubMed PMID: 32275124.</p> | No appropriate outcome           |
| <p>16: de Ángel Solá DE, Wang L, Vázquez M, Méndez Lázaro PA. Weathering the pandemic: How the Caribbean Basin can use viral and environmental patterns to predict, prepare and respond to COVID-19. <i>J Med Virol</i>. 2020 Apr 10. doi:10.1002/jmv.25864. [Epub ahead of print] Review. PubMed PMID: 32275090.</p>                                                                                                                                                | No appropriate outcome           |
| <p>17: Lippi G, Mattiuzzi C, Sanchis-Gomar F, Henry BM. Clinical and demographic characteristics of patients dying from COVID-19 in Italy versus China. <i>J Med Virol</i>. 2020 Apr 10. doi: 10.1002/jmv.25860. [Epub ahead of print] PubMed PMID:32275075</p>                                                                                                                                                                                                      | No appropriate outcome           |
| <p>18: He G, Sun W, Fang P, Huang J, Gamber M, Cai J, Wu J. The clinical feature of silent infections of novel coronavirus infection (COVID-19) in Wenzhou. <i>J Med Virol</i>. 2020 Apr 10. doi: 10.1002/jmv.25861. [Epub ahead of print] PubMed PMID:32275074</p>                                                                                                                                                                                                  | No appropriate population sample |
| <p>19: Xiong X, Wei H, Zhang Z, Chang J, Ma X, Gao X, Chen Q, Pang Q. Vaginal Delivery Report of a Healthy Neonate Born to a Convalescent Mother with COVID-19. <i>J Med Virol</i>. 2020 Apr 10. doi: 10.1002/jmv.25857. [Epub ahead of print] PubMed PMID: 32275072.</p>                                                                                                                                                                                            | Included                         |
| <p>20: Porpiglia F, Checcucci E, Amparore D, Verri P, Campi R, Claps F, Esperto F, Fiori C, Carrieri G, Ficarra V, Scarpa RM, Dasgupta P; European Society of Residents in Urology (ESRU) of European Association of Urology (EAU). Slowdown of urology residents' learning curve during COVID-19 emergency. <i>BJU Int</i>. 2020 Apr 9. doi: 10.1111/bju.15076.</p>                                                                                                 | No appropriate population sample |

|                                                                                                                                                                                                                                                                                                                                                                                                    |                        |
|----------------------------------------------------------------------------------------------------------------------------------------------------------------------------------------------------------------------------------------------------------------------------------------------------------------------------------------------------------------------------------------------------|------------------------|
| [Epub ahead of print] PubMed PMID: 32274879.                                                                                                                                                                                                                                                                                                                                                       |                        |
| 21: Kranke P, Weibel S, Sitter M, Meybohm P, Girard T. [Obstetric Anesthesia During the SARS-CoV-2 Pandemic - a Brief Overview of Published Recommendations for Action by National and International Specialist Societies and Committees]. <i>Anesthesiol Intensivmed Notfallmed Schmerzther.</i> 2020 Apr;55(4):266-274. doi:10.1055/a-1144-5562. Epub 2020 Apr 9. German. PubMed PMID: 32274774. | No original article    |
| 22: McIntosh JJ. Corticosteroid Guidance for Pregnancy during COVID-19 Pandemic. <i>Am J Perinatol.</i> 2020 Apr 9. doi: 10.1055/s-0040-1709684. [Epub ahead of print] PubMed PMID: 32274772.                                                                                                                                                                                                      | No original article    |
| 23: Gonzalez-Brown VM, Reno J, Lortz H, Fiorini K, Costantine MM. Operating Room Guide for Confirmed or Suspected COVID-19 Pregnant Patients Requiring Cesarean Delivery. <i>Am J Perinatol.</i> 2020 Apr 9. doi: 10.1055/s-0040-1709683. [Epub ahead of print] PubMed PMID: 32274771.                                                                                                             | No original article    |
| 24: Li J, Fan JG. Characteristics and Mechanism of Liver Injury in 2019 Coronavirus Disease. <i>J Clin Transl Hepatol.</i> 2020 Mar 28;8(1):13-17. doi:10.14218/JCTH.2020.00019. Epub 2020 Mar 30. Review. PubMed PMID: 32274341; PubMed Central PMCID: PMC7132021.                                                                                                                                | No appropriate outcome |
| 25: Lloyd R. Six ways to juggle science and childcare from home. <i>Nature.</i> 2020 Apr 9. doi: 10.1038/d41586-020-01060-x. [Epub ahead of print] PubMed PMID: 32273622.                                                                                                                                                                                                                          | No appropriate outcome |
| 26: Rossman H, Keshet A, Shilo S, Gavrieli A, Bauman T, Cohen O, Shelly E, Balicer R, Geiger B, Dor Y, Segal E. A framework for identifying regional outbreak and spread of COVID-19 from one-minute population-wide                                                                                                                                                                               | No appropriate outcome |

|                                                                                                                                                                                                                                                                                                                                                                                                                             |                                  |
|-----------------------------------------------------------------------------------------------------------------------------------------------------------------------------------------------------------------------------------------------------------------------------------------------------------------------------------------------------------------------------------------------------------------------------|----------------------------------|
| surveys. Nat Med.2020 Apr 9. doi: 10.1038/s41591-020-0857-9. [Epub ahead of print] PubMed PMID:32273611                                                                                                                                                                                                                                                                                                                     |                                  |
| 27: Stower H. Clinical and epidemiological characteristics of children with COVID-19. Nat Med. 2020 Apr 9. doi: 10.1038/s41591-020-0846-z. [Epub ahead of print] PubMed PMID: 32273605.                                                                                                                                                                                                                                     | No appropriate population sample |
| 28: Balasubramanian S, Rao NM, Goenka A, Roderick M, Ramanan AV. Coronavirus Disease (COVID-19) in Children - What We Know So Far and What We Do Not? Indian Pediatr. 2020 Apr 9. pii: S097475591600159. [Epub ahead of print] PubMed PMID:32273490                                                                                                                                                                         | No original article              |
| 29: Guiqing HE, Sun W, Jing WU, Cai J. Serial Computed Tomography Manifestations in a Child with Coronavirus Disease (COVID-19) Pneumonia. Indian Pediatr. 2020 Apr 9. pii: S097475591600158. [Epub ahead of print] PubMed PMID: 32273489.                                                                                                                                                                                  | No appropriate population sample |
| 30: Kulkarni RK, Kinikar AA, Chandanwale A. Impact of COVID-19 on Children and Pediatricians. Indian Pediatr. 2020 Apr 9. pii: S097475591600157. [Epub ahead of print] PubMed PMID: 32273488.                                                                                                                                                                                                                               | No appropriate population sample |
| 31: Vessey JA, Betz CL. Everything old is new again: COVID-19 and public health. J Pediatr Nurs. 2020 Mar 26. pii: S0882-5963(20)30205-0. doi:10.1016/j.pedn.2020.03.014. [Epub ahead of print] PubMed PMID: 32273143.                                                                                                                                                                                                      | No appropriate outcome           |
| 32: Coccolini F, Sartelli M, Kluger Y, Pikoulis E, Karamagioli E, Moore EE, Biffi WL, Peitzman A, Hecker A, Chirica M, Damaskos D, Ordonez C, Vega F, Fraga GP, Chiarugi M, Di Saverio S, Kirkpatrick AW, Abu-Zidan F, Mefire AC, Leppaniemi A, Khokha V, Sakakushev B, Catena R, Coimbra R, Ansaloni L, Corbella D, Catena F. COVID-19 the showdown for mass casualty preparedness and management: the Cassandra Syndrome. | No appropriate population sample |

|                                                                                                                                                                                                                                                                                                                                                                                                                                              |                                         |
|----------------------------------------------------------------------------------------------------------------------------------------------------------------------------------------------------------------------------------------------------------------------------------------------------------------------------------------------------------------------------------------------------------------------------------------------|-----------------------------------------|
| <p>World J Emerg Surg. 2020 Apr 9;15(1):26. doi:10.1186/s13017-020-00304-5. PubMed PMID: 32272957.</p>                                                                                                                                                                                                                                                                                                                                       |                                         |
| <p>33: Cianfarani S. Pediatric Endocrinology in the Time of the COVID-19 Pandemic. Horm Res Paediatr. 2020 Apr 9:1-2. doi: 10.1159/000507703. [Epub ahead of print] PubMed PMID: 32272473.</p>                                                                                                                                                                                                                                               | <p>No appropriate population sample</p> |
| <p>34: Ghaysouri A, Sadeghifard N, Nazari A, Kalvandi G, Feizi J, Qasemi E, Kafashian M, Borji M, Kokhazadeh T, Tavan H. New clinical experiences and evaluation of clinical and paraclinical features of deceased patients with COVID-19 infection referred to Shahid Mostafa Khomeini Hospital of Ilam, Iran. Travel Med Infect Dis. 2020 Apr 6:101657. doi: 10.1016/j.tmaid.2020.101657. [Epub ahead of print] PubMed PMID: 32272197.</p> | <p>No appropriate population sample</p> |
| <p>35: Viner RM, Russell SJ, Croker H, Packer J, Ward J, Stansfield C, Mytton O, Bonell C, Booy R. School closure and management practices during coronavirus outbreaks including COVID-19: a rapid systematic review. Lancet Child Adolesc Health. 2020 Apr 6. pii: S2352-4642(20)30095-X. doi:10.1016/S2352-4642(20)30095-X. [Epub ahead of print] Review. PubMed PMID:32272089</p>                                                        | <p>No appropriate population sample</p> |
| <p>36: Bayefsky MJ, Bartz D, Watson KL. Abortion during the Covid-19 Pandemic - Ensuring Access to an Essential Health Service. N Engl J Med. 2020 Apr 9. doi:10.1056/NEJMp2008006. [Epub ahead of print] PubMed PMID: 32272002.</p>                                                                                                                                                                                                         | <p>No appropriate population sample</p> |
| <p>37: Parazzini F, Bortolus R, Mauri PA, Favilli A, Gerli S, Ferrazzi E. Delivery in pregnant women infected with SARS-CoV-2: A fast review. Int J Gynaecol Obstet. 2020 Apr 9. doi: 10.1002/ijgo.13166. [Epub ahead of print] Review. PubMed PMID:32271947</p>                                                                                                                                                                             | <p>No original article</p>              |

|                                                                                                                                                                                                                                                                                                                                                                   |                               |
|-------------------------------------------------------------------------------------------------------------------------------------------------------------------------------------------------------------------------------------------------------------------------------------------------------------------------------------------------------------------|-------------------------------|
| <p>38: Hooli S, King C. Generalizability of COVID-19 Clinical Prediction Models. Clin Infect Dis. 2020 Apr 9. pii: ciaa417. doi: 10.1093/cid/ciaa417. [Epub ahead of print] PubMed PMID: 32271865.</p>                                                                                                                                                            | <p>No appropriate outcome</p> |
| <p>39: CDC COVID-19 Response Team. Coronavirus Disease 2019 in Children - United States, February 12-April 2, 2020. MMWR Morb Mortal Wkly Rep. 2020 Apr 10;69(14):422-426. doi: 10.15585/mmwr.mm6914e4. PubMed PMID: 32271728.</p>                                                                                                                                | <p>No appropriate outcome</p> |
| <p>40: Zwald ML, Lin W, Sondermeyer Cooksey GL, Weiss C, Suarez A, Fischer M, Bonin BJ, Jain S, Langley GE, Park BJ, Moulia D, Benedict R, Nguyen N, Han GS. Rapid Sentinel Surveillance for COVID-19 - Santa Clara County, California, March 2020. MMWR Morb Mortal Wkly Rep. 2020 Apr 10;69(14):419-421. doi:10.15585/mmwr.mm6914e3. PubMed PMID: 32271724.</p> | <p>No appropriate outcome</p> |
| <p>41: Stuebe A. Should Infants Be Separated from Mothers with COVID-19? First, Do No Harm. Breastfeed Med. 2020 Apr 7. doi: 10.1089/bfm.2020.29153.ams. [Epub ahead of print] PubMed PMID: 32271625.</p>                                                                                                                                                         | <p>No original article</p>    |
| <p>42: Huang X, Wei F, Hu L, Wen L, Chen K. Epidemiology and Clinical Characteristics of COVID-19. Arch Iran Med. 2020 Apr 1;23(4):268-271. doi:10.34172/aim.2020.09. Review. PubMed PMID: 32271601.</p>                                                                                                                                                          | <p>No original article</p>    |
| <p>43: Bizzarri M, Laganà AS, Aragona D, Unfer V. Inositol and pulmonary function. Could myo-inositol treatment downregulate inflammation and cytokine release syndrome in SARS-CoV-2? Eur Rev Med Pharmacol Sci. 2020 Mar;24(6):3426-3432. doi:10.26355/eurrev_202003_20715. PubMed PMID: 32271462.</p>                                                          | <p>No appropriate outcome</p> |

|                                                                                                                                                                                                                                                                                                                                                                                                                                                                |                                         |
|----------------------------------------------------------------------------------------------------------------------------------------------------------------------------------------------------------------------------------------------------------------------------------------------------------------------------------------------------------------------------------------------------------------------------------------------------------------|-----------------------------------------|
| <p>44: Abu-Raya B. Predictors of refractory Coronavirus disease (COVID-19)pneumonia. Clin Infect Dis. 2020 Apr 9. pii: ciaa409. doi: 10.1093/cid/ciaa409.[Epub ahead of print] PubMed PMID: 32271373.</p>                                                                                                                                                                                                                                                      | <p>No appropriate outcome</p>           |
| <p>45: Lighter J, Phillips M, Hochman S, Sterling S, Johnson D, Francois F, Stachel A. Obesity in patients younger than 60 years is a risk factor for Covid-19hospital admission. Clin Infect Dis. 2020 Apr 9. pii: ciaa415. doi:10.1093/cid/ciaa415. [Epub ahead of print] PubMed PMID: 32271368.</p>                                                                                                                                                         | <p>No appropriate population sample</p> |
| <p>46: Stoian AP, Banerjee Y, Rizvi AA, Rizzo M. Diabetes and the COVID-19 Pandemic:How Insights from Recent Experience Might Guide Future Management. Metab SyndrRelat Disord. 2020 Apr 8. doi: 10.1089/met.2020.0037. [Epub ahead of print]PubMed PMID: 32271125.</p>                                                                                                                                                                                        | <p>No appropriate population sample</p> |
| <p>47: Mohammadi S, Tabatabaei Yazdi SM, Eshghi P, Norooznejhad AH. Coronavirus-19Disease (COVID-19) and Decrease in Blood Donation: Experience of Iranian BloodTransfusion Organization (IBTO). Vox Sang. 2020 Apr 9. doi: 10.1111/vox.12930.[Epub ahead of print] PubMed PMID: 32270880.</p>                                                                                                                                                                 | <p>No appropriate outcome</p>           |
| <p>48: Lippi G, Henry BM, Sanchis-Gomar F. Physical inactivity and cardiovasculardisease at the time of coronavirus disease 2019 (COVID-19). Eur J Prev Cardiol.2020 Apr 9:2047487320916823. doi: 10.1177/2047487320916823. [Epub ahead of print]PubMed PMID: 32270698.</p>                                                                                                                                                                                    | <p>No appropriate outcome</p>           |
| <p>49: Edelson DP, Sasson C, Chan PS, Atkins DL, Aziz K, Becker LB, Berg RA, BradleySM, Brooks SC, Cheng A, Escobedo M, Flores GE, Girotra S, Hsu A, Kamath-Rayne BD, Lee HC, Lehotzky RE, Mancini ME, Merchant RM, Nadkarni VM, Panchal AR, PeberdyMAR, Raymond TT, Walsh B, Wang DS, Zelop CM, Topjian A. Interim Guidance forBasic and Advanced Life Support in Adults, Children, and Neonates With Suspected or Confirmed COVID-19: From the Emergency</p> | <p>No original article</p>              |



|                                                                                                                                                                                                                                                                                                                                                                                                                                                                                                                                                                                                               |                                  |
|---------------------------------------------------------------------------------------------------------------------------------------------------------------------------------------------------------------------------------------------------------------------------------------------------------------------------------------------------------------------------------------------------------------------------------------------------------------------------------------------------------------------------------------------------------------------------------------------------------------|----------------------------------|
| <p>Cardiovascular Care Committee and GetWith the Guidelines(®)-Resuscitation Adult and Pediatric Task Forces of the American Heart Association in Collaboration with the American Academy of Pediatrics, American Association for Respiratory Care, American College of Emergency Physicians, The Society of Critical Care Anesthesiologists, and American Society of Anesthesiologists: Supporting Organizations: American Association of Critical Care Nurses and National EMS Physicians. Circulation.2020 Apr 9. doi: 10.1161/CIRCULATIONAHA.120.047463. [Epub ahead of print] PubMed PMID: 32270695.</p> |                                  |
| <p>50: Zhu L, Wang J, Huang R, Liu L, Zhao H, Wu C, Zhu C. Clinical characteristics of a case series of children with coronavirus disease 2019. <i>Pediatr Pulmonol.</i>2020 Apr 8. doi: 10.1002/ppul.24767. [Epub ahead of print] PubMed PMID: 32270592.</p>                                                                                                                                                                                                                                                                                                                                                 | No appropriate population sample |
| <p>51: Kowalski LP, Sanabria A, Ridge JA, Ng WT, de Bree R, Rinaldo A, Takes RP, Mäkitie AA, Carvalho AL, Bradford CR, Paleri V, Hartl DM, Poorten VV, Nixon IJ, Piazza C, Lacy P, Rodrigo JP, Guntinas-Lichius O, Mendenhall WM, D'Cruz A, Lee AWM, Ferlito A. COVID-19 pandemic: effects and evidence-based recommendations for otolaryngology and head and neck surgery practice. <i>Head Neck.</i> 2020 Apr 9. doi:10.1002/hed.26164. [Epub ahead of print] PubMed PMID: 32270581.</p>                                                                                                                    | No appropriate population sample |
| <p>52: Wu X, Sun R, Chen J, Xie Y, Zhang S, Wang X. Radiological findings and clinical characteristics of pregnant women with COVID-19 pneumonia. <i>Int J Gynaecol Obstet.</i> 2020 Apr 8. doi: 10.1002/ijgo.13165. [Epub ahead of print] PubMed PMID: 32270479.</p>                                                                                                                                                                                                                                                                                                                                         | Included                         |
| <p>53: Ciavattini A, Delli Carpini G, Giannella L, De Vincenzo R, Frega A, Cattani P, Boselli F, Sopracordevole F, Barbero M. Expert consensus from the Italian Society for Colposcopy and Cervico-Vaginal Pathology (SICPCV) for colposcopy and outpatient surgery of the lower genital tract during the</p>                                                                                                                                                                                                                                                                                                 | No appropriate population sample |

|                                                                                                                                                                                                                                                                                                                                                                                                                                   |                                         |
|-----------------------------------------------------------------------------------------------------------------------------------------------------------------------------------------------------------------------------------------------------------------------------------------------------------------------------------------------------------------------------------------------------------------------------------|-----------------------------------------|
| <p>COVID-19 pandemic. Int JGynaecol Obstet. 2020 Apr 8. doi: 10.1002/ijgo.13158. [Epub ahead of print]PubMed PMID: 32270477.</p>                                                                                                                                                                                                                                                                                                  |                                         |
| <p>54: Salako O, Okunade K, Allsop M, Habeebu M, Toye M, Oluyede G, Fagbenro G,Salako B. Upheaval in cancer care during the COVID-19 outbreak.Ecancermedalscience. 2020 Apr 1;14:ed97. doi: 10.3332/ecancer.2020.ed97.eCollection 2020. PubMed PMID: 32269597; PubMed Central PMCID: PMC7134578.</p>                                                                                                                              | <p>No appropriate population sample</p> |
| <p>55: Morray BH, Gordon BM, Crystal MA, Goldstein BH, Qureshi AM, Torres AJ,Epstein SM, Crittendon I, Ing FF, Sathanandam SK. Resource Allocation andDecision Making for Pediatric and Congenital Cardiac Catheterization During theNovel Coronavirus SARS-CoV-2 (COVID-19) Pandemic: A U.S. Multi-InstitutionalPerspective. J Invasive Cardiol. 2020 Apr 9. pii: JIC20200409-2. [Epub ahead ofprint] PubMed PMID: 32269177.</p> | <p>No appropriate population sample</p> |
| <p>56: Zhang ZJ, Yu XJ, Fu T, Liu Y, Jiang Y, Yang BX, Bi Y. Novel CoronavirusInfection in Newborn Babies Under 28 Days in China. Eur Respir J. 2020 Apr 8.pii: 2000697. doi: 10.1183/13993003.00697-2020. [Epub ahead of print] PubMedPMID: 32269087.</p>                                                                                                                                                                        | <p>Included</p>                         |
| <p>57: Juurlink DN. Safety considerations with chloroquine, hydroxychloroquine andazithromycin in the management of SARS-CoV-2 infection. CMAJ. 2020 Apr 8. pii:cmaj.200528. doi: 10.1503/cmaj.200528. [Epub ahead of print] PubMed PMID:32269021</p>                                                                                                                                                                             | <p>No appropriate outcome</p>           |
| <p>58: Du L, Gu YB, Cui MQ, Li WX, Wang J, Zhu LP, Xu B. [Investigation on demandsfor antenatal care services among 2 002 pregnant women during the epidemic ofCOVID-19 in Shanghai]. Zhonghua Fu Chan Ke Za Zhi. 2020 Mar 25;55(3):160-165.doi: 10.3760/cma.j.cn112141-20200218-00112. Chinese. PubMed PMID: 32268713.</p>                                                                                                       | <p>No appropriate outcome</p>           |

|                                                                                                                                                                                                                                                                                                                                             |                               |
|---------------------------------------------------------------------------------------------------------------------------------------------------------------------------------------------------------------------------------------------------------------------------------------------------------------------------------------------|-------------------------------|
| <p>59: Sun LL, Gong Q, Liao J, Ke JJ, Wang Y, Zhang YZ, Zhang W, Li JF.[Perioperative management of cesarean section for pregnant women with suspected or confirmed COVID-19]. Zhonghua Fu Chan Ke Za Zhi. 2020 Mar 25;55(3):157-159.doi: 10.3760/cma.j.cn112141-20200220-00118. Chinese. PubMed PMID: 32268712.</p>                        | <p>No useful data</p>         |
| <p>60: Pu J, Liu XX. [Systematic perinatal management of the pregnant women and neonates during the epidemic of COVID-19]. Zhonghua Fu Chan Ke Za Zhi. 2020 Mar 25;55(3):153-156. doi: 10.3760/cma.j.cn112141-20200221-00123. Chinese. PubMed PMID: 32268711.</p>                                                                           | <p>No original article</p>    |
| <p>61: National Center for Health Care Quality Management in Obstetrics.[Suggestions on delivery management of pregnant women with COVID-19]. Zhonghua Fu Chan Ke Za Zhi. 2020 Mar 25;55(3):150-152. doi:10.3760/cma.j.cn112141-20200224-00128. Chinese. PubMed PMID: 32268710.</p>                                                         | <p>No original article</p>    |
| <p>62: Wang C, Yang HX. [Attach importance to COVID-19 infection on maternal and infant outcomes]. Zhonghua Fu Chan Ke Za Zhi. 2020 Mar 25;55(3):147-149. doi:10.3760/cma.j.cn112141-20200229-00151. Chinese. PubMed PMID: 32268709.</p>                                                                                                    | <p>No original article</p>    |
| <p>63: Yang C, Ma QY, Zheng YH, Yang YX. [Transmission routes of 2019-novel coronavirus (2019-nCoV)]. Zhonghua Yu Fang Yi Xue Za Zhi. 2020 Apr 6;54(4):374-377. doi: 10.3760/cma.j.cn112150-20200216-0016. Review. Chinese. PubMed PMID: 32268644.</p>                                                                                      | <p>No original article</p>    |
| <p>64: Chen Y, Jin YL, Zhu LJ, Fang ZM, Wu N, Du MX, Jiang MM, Wang J, Yao YS. [The network investigation on knowledge, attitude and practice about COVID-19 of the residents in Anhui Province]. Zhonghua Yu Fang Yi Xue Za Zhi. 2020 Apr 6;54(4):367-373. doi: 10.3760/cma.j.cn112150-20200205-00069. Chinese. PubMed PMID: 32268643.</p> | <p>No appropriate outcome</p> |

|                                                                                                                                                                                                                                                                                                                                                                                        |                                         |
|----------------------------------------------------------------------------------------------------------------------------------------------------------------------------------------------------------------------------------------------------------------------------------------------------------------------------------------------------------------------------------------|-----------------------------------------|
| <p>65: Grange ES, Neil EJ, Stoffel M, Singh AP, Tseng E, Resco-Summers K, FellnerBJ, Lynch JB, Mathias PC, Mauritz-Miller K, Sutton PR, Leu MG. Responding toCOVID-19: The UW Medicine Information Technology Services Experience. <i>Appl ClinInform.</i> 2020 Mar;11(2):265-275. doi: 10.1055/s-0040-1709715. Epub 2020 Apr 8.PubMed PMID: 32268390.</p>                             | <p>No appropriate outcome</p>           |
| <p>66: Chandrasekharan P, Vento M, Trevisanuto D, Partridge E, Underwood MA,Wiedeman J, Katheria A, Lakshminrusimha S. Neonatal Resuscitation andPostresuscitation Care of Infants Born to Mothers with Suspected or ConfirmedSARS-CoV-2 Infection. <i>Am J Perinatol.</i> 2020 Apr 8. doi: 10.1055/s-0040-1709688.[Epub ahead of print] PubMed PMID: 32268381.</p>                    | <p>No original article</p>              |
| <p>67: Zhu L, Lu X, Chen L. Possible causes for decreased susceptibility of childrento coronavirus. <i>Pediatr Res.</i> 2020 Apr 8. doi: 10.1038/s41390-020-0892-8. [Epubahead of print] PubMed PMID: 32268343.68: Wang KW, Gao J, Wang H, Wu XL, Yuan QF, Guo FY, Zhang ZJ, Cheng Y.</p>                                                                                              | <p>No original article</p>              |
| <p>68: Wang KW, Gao J, Wang H, Wu XL, Yuan QF, Guo FY, Zhang ZJ, Cheng Y.Epidemiology of 2019 novel coronavirus in Jiangsu Province, China after wartimecontrol measures: A population-level retrospective study. <i>Travel Med Infect Dis.</i> 2020 Apr 5:101654. doi: 10.1016/j.tmaid.2020.101654. [Epub ahead of print] PubMedPMID: 32268195; PubMed Central PMCID: PMC7130124.</p> | <p>No appropriate outcome</p>           |
| <p>69: Molloy EJ, Murphy N. Vitamin D, Covid-19 and Children. <i>Ir Med J.</i> 2020 Apr3;113(4):64. PubMed PMID: 32268052.</p>                                                                                                                                                                                                                                                         | <p>No appropriate population sample</p> |

|                                                                                                                                                                                                                                                                                                                                                                                            |                                         |
|--------------------------------------------------------------------------------------------------------------------------------------------------------------------------------------------------------------------------------------------------------------------------------------------------------------------------------------------------------------------------------------------|-----------------------------------------|
| <p>70: O'Brien M, Moore K, McNicholas F. Social Media Spread During Covid-19: ThePros and Cons of Likes and Shares. Ir Med J. 2020 Apr 3;113(4):52. PubMed PMID:32268046</p>                                                                                                                                                                                                               | <p>No appropriate outcome</p>           |
| <p>71: Gavin B, Hayden J, Adamis D, McNicholas F. Caring for the PsychologicalWell-Being of Healthcare Professionals in the Covid-19 Pandemic Crisis. Ir Med J.2020 Apr 3;113(4):51. PubMed PMID: 32268045.</p>                                                                                                                                                                            | <p>No appropriate outcome</p>           |
| <p>72: Wang J, Hajizadeh N, Moore EE, McIntyre RC, Moore PK, Veress LA, Yaffe MB,Moore HB, Barrett CD. Tissue Plasminogen Activator (tPA) Treatment for COVID-19Associated Acute Respiratory Distress Syndrome (ARDS): A Case Series. J ThrombHaemost. 2020 Apr 8. doi: 10.1111/jth.14828. [Epub ahead of print] PubMed PMID:32267998</p>                                                  | <p>No appropriate population sample</p> |
| <p>73: Bourne T, Leonardi M, Kyriacou C, Al-Memar M, Landolfo C, Cibula D, CondousG, Metzger U, Fischerova D, Timmerman D, van den Bosch T. ISUOG ConsensusStatement on rationalization of gynecological ultrasound services in context ofSARS-CoV-2. Ultrasound Obstet Gynecol. 2020 Apr 8. doi: 10.1002/uog.22047. [Epub ahead of print] PubMed PMID: 32267984.</p>                      | <p>No original article</p>              |
| <p>74: Bourne T, Kyriacou C, Coomarasamy A, Al-Memar M, Leonardi M, Kirk E, LandolfoC, Blanchette-Porter M, Small R, Condous G, Timmerman D. ISUOG ConsensusStatement on rationalization of early-pregnancy care and provision ofultrasonography in context of SARS-CoV-2. Ultrasound Obstet Gynecol. 2020 Apr 8. doi: 10.1002/uog.22046. [Epub ahead of print] PubMed PMID: 32267981.</p> | <p>No original article</p>              |
| <p>75: Huang H, Fan C, Li M, Nie HL, Wang FB, Wang H, Wang R, Xia J, Zheng X, Zuo X,Huang J. COVID-19: A Call for Physical Scientists and Engineers. ACS Nano. 2020Apr 8. doi: 10.1021/acsnano.0c02618. [Epub ahead of print] PubMed PMID: 32267678;PubMed Central PMCID: PMC7144807.</p>                                                                                                  | <p>No appropriate population sample</p> |

|                                                                                                                                                                                                                                                                                                                                       |                                         |
|---------------------------------------------------------------------------------------------------------------------------------------------------------------------------------------------------------------------------------------------------------------------------------------------------------------------------------------|-----------------------------------------|
| <p>76: Mahony R. Pregnancy and Sars-Cov-2: A Novel Virus in a Unique Population. <i>Ir Med J.</i> 2020 Apr 3;113(4):49. PubMed PMID: 32267662.</p>                                                                                                                                                                                    | <p>No original article</p>              |
| <p>77: Ferrazzi EM, Frigerio L, Cetin I, Vergani P, Spinillo A, Prefumo F, Pellegrini E, Gargantini G. COVID-19 Obstetrics Task Force, Lombardy, Italy: executive management summary and short report of outcome. <i>Int J Gynaecol Obstet.</i> 2020 Apr 8. doi: 10.1002/ijgo.13162. [Epub ahead of print] PubMed PMID: 32267531.</p> | <p>No original article</p>              |
| <p>78: Tagarro A, Epalza C, Santos M, Sanz-Santaefemia FJ, Otheo E, Moraleda C, Calvo C. Screening and Severity of Coronavirus Disease 2019 (COVID-19) in Children in Madrid, Spain. <i>JAMA Pediatr.</i> 2020 Apr 8. doi:10.1001/jamapediatrics.2020.1346. [Epub ahead of print] PubMed PMID: 32267485.</p>                          | <p>No appropriate population sample</p> |
| <p>79: Lippi G, Henry BM, Bovo C, Sanchis-Gomar F. Health risks and potential remedies during prolonged lockdowns for coronavirus disease 2019 (COVID-19). <i>Diagnosis (Berl).</i> 2020 Apr 7. pii:/dx.ahead-of-print/dx-2020-0041/dx-2020-0041.xml. doi: 10.1515/dx-2020-0041. [Epub ahead of print] PubMed PMID: 32267243.</p>     | <p>No appropriate outcome</p>           |
| <p>80: Davenne E, Giot JB, Huynen P. [Coronavirus and COVID-19 : focus on galloping pandemic]. <i>Rev Med Liege.</i> 2020 Apr;75(4):218-225. French. PubMed PMID: 3226710981: Thampi S, Yap A, Lijia F, Ong J. Special considerations for the management of</p>                                                                       | <p>No original article</p>              |
| <p>81: Thampi S, Yap A, Lijia F, Ong J. Special considerations for the management of COVID-19 pediatric patients in the operating room and pediatric intensive care unit in a tertiary hospital in Singapore. <i>Paediatr Anaesth.</i> 2020 Apr 8. doi:10.1111/pan.13863. [Epub ahead of print] PubMed PMID: 32267047.</p>            | <p>No original article</p>              |

|                                                                                                                                                                                                                                                                                                                                                                                                                                                                                           |                                         |
|-------------------------------------------------------------------------------------------------------------------------------------------------------------------------------------------------------------------------------------------------------------------------------------------------------------------------------------------------------------------------------------------------------------------------------------------------------------------------------------------|-----------------------------------------|
| <p>82: Lippi G, South AM, Henry BM. ANNALS EXPRESS: Electrolyte Imbalances inPatients with Severe Coronavirus Disease 2019 (COVID-19). Ann Clin Biochem. 2020 Apr 8:4563220922255. doi: 10.1177/0004563220922255. [Epub ahead of print] PubMed PMID: 32266828.</p>                                                                                                                                                                                                                        | <p>No appropriate population sample</p> |
| <p>83: Wang C, Zhou YH, Yang HX, Poon LC. Intrauterine vertical transmission ofSARS-CoV-2: what we know so far. Ultrasound Obstet Gynecol. 2020 Apr 7. doi:10.1002/uog.22045. [Epub ahead of print] PubMed PMID: 32266753.84: Iaccarino G, Borghi C, Cicero AFG, Ferri C, Minuz P, Muiesan ML, Mulatero P,</p>                                                                                                                                                                            | <p>No original article</p>              |
| <p>84: Iaccarino G, Borghi C, Cicero AFG, Ferri C, Minuz P, Muiesan ML, Mulatero P, Mulè G, Pucci G, Salvetti M, Savoia C, Sechi LA, Volpe M, Grassi G. Renin-Angiotensin System Inhibition in Cardiovascular Patients at the Time of COVID19: Much Ado for Nothing? A Statement of Activity from the Directors of the Board and the Scientific Directors of the Italian Society of Hypertension. HighBlood Press Cardiovasc Prev. 2020 Apr 7. doi: 10.1007/s40292-020-00380-3. [Epub</p> | <p>No appropriate population sample</p> |
| <p>85: Chen Y, Peng H, Wang L, Zhao Y, Zeng L, Gao H, Liu Y. Infants Born to MothersWith a New Coronavirus (COVID-19). Front Pediatr. 2020 Mar 16;8:104. doi:10.3389/fped.2020.00104. eCollection 2020. PubMed PMID: 32266184; PubMed Central PMCID: PMC7098456.</p>                                                                                                                                                                                                                      | <p>Overlapping data</p>                 |
| <p>86: Bauer M, Bernstein K, Dinges E, Delgado C, El-Sharawi N, Sultan P, Mhyre JM, Landau R. Obstetric Anesthesia During the COVID-19 Pandemic. Anesth Analg. 2020Apr 6. doi: 10.1213/ANE.0000000000004856. [Epub ahead of print] PubMed PMID:32265365</p>                                                                                                                                                                                                                               | <p>No original article</p>              |
| <p>87: Li K, Li Z, Wohlford-Lenane C, Meyerholz DK, Channappanavar R, An D, Perlman S, McCray PB Jr, He B. Single-Dose, Intranasal Immunization with RecombinantParainfluenza Virus 5 Expressing Middle East Respiratory</p>                                                                                                                                                                                                                                                              | <p>No appropriate outcome</p>           |

|                                                                                                                                                                                                                                                                                                                                                                                                                                                                  |                                         |
|------------------------------------------------------------------------------------------------------------------------------------------------------------------------------------------------------------------------------------------------------------------------------------------------------------------------------------------------------------------------------------------------------------------------------------------------------------------|-----------------------------------------|
| <p>Syndrome Coronavirus(MERS-CoV) Spike Protein Protects Mice from Fatal MERS-CoV Infection. <i>mBio</i>. 2020 Apr 7;11(2). pii: e00554-20. doi: 10.1128/mBio.00554-20. PubMed PMID: 32265331.</p>                                                                                                                                                                                                                                                               |                                         |
| <p>88: Swennen GRJ, Pottel L, Haers PE. Custom-made 3D-printed face masks in case of pandemic crisis situations with a lack of commercially available FFP2/3 masks. <i>Int J Oral Maxillofac Surg</i>. 2020 Apr 2. pii: S0901-5027(20)30123-5. doi:10.1016/j.ijom.2020.03.015. [Epub ahead of print] PubMed PMID: 32265088.</p>                                                                                                                                  | <p>No appropriate outcome</p>           |
| <p>89: Penel N, Bonvalot S, Minard V, Orbach D, Gouin F, Corradini N, Brahmi M, Marec-Berard P, Briand S, Gaspar N, Llacer C, Carrere S, Dufresne A, Le Cesne A, Blay JY. [French Sarcoma Group proposals for management of sarcoma patients during COVID-19 outbreak]. <i>Bull Cancer</i>. 2020 Apr 1. pii: S0007-4551(20)30160-0. doi: 10.1016/j.bulcan.2020.03.009. [Epub ahead of print] French. PubMed PMID:32265035; PubMed Central PMCID: PMC7118687.</p> | <p>No appropriate population sample</p> |
| <p>90: COVID-19 National Incident Room Surveillance Team. COVID-19, Australia: Epidemiology Report 9 (Reporting week to 23:59 AEDT 29 March 2020). <i>Commun DisIntell</i> (2018). 2020 Apr 3;44. doi: 10.33321/cdi.2020.44.29. PubMed PMID:32264802</p>                                                                                                                                                                                                         | <p>No appropriate outcome</p>           |
| <p>91: Haşlak F, Yıldız M, Adrovic A, Barut K, Kasapçopur Ö. Childhood Rheumatic Diseases and COVID-19 Pandemic: An Intriguing Linkage and a New Horizon. <i>BalkanMed J</i>. 2020 Apr 8. doi: 10.4274/balkanmedj.galenos.2020.2020.4.43. [Epub ahead of print] PubMed PMID: 32264666.</p>                                                                                                                                                                       | <p>No appropriate outcome</p>           |
| <p>92: Bansal P, Bingemann TA, Greenhawt M, Mosnaim G, Nanda A, Oppenheimer J, Sharma H, Stukus D, Shaker M. Clinician Wellness During the COVID-19 Pandemic: Extraordinary Times and Unusual Challenges for the Allergist/Immunologist.</p>                                                                                                                                                                                                                     | <p>No appropriate population sample</p> |



|                                                                                                                                                                                                                                                                                                                                                                                                                                                                   |                                  |
|-------------------------------------------------------------------------------------------------------------------------------------------------------------------------------------------------------------------------------------------------------------------------------------------------------------------------------------------------------------------------------------------------------------------------------------------------------------------|----------------------------------|
| <p>JAllergy Clin Immunol Pract. 2020 Apr 4. pii: S2213-2198(20)30327-5. doi:10.1016/j.jaip.2020.04.001. [Epub ahead of print] Review. PubMed PMID: 32259628; PubMed Central PMCID: PMC7129776.</p>                                                                                                                                                                                                                                                                |                                  |
| <p>93: Kim YI, Kim SG, Kim SM, Kim EH, Park SJ, Yu KM, Chang JH, Kim EJ, Lee S, Casel MAB, Um J, Song MS, Jeong HW, Lai VD, Kim Y, Chin BS, Park JS, Chung KH, Foo SS, Poo H, Mo IP, Lee OJ, Webby RJ, Jung JU, Choi YK. Infection and Rapid Transmission of SARS-CoV-2 in Ferrets. Cell Host Microbe. 2020 Apr 5. pii:S1931-3128(20)30187-6. doi: 10.1016/j.chom.2020.03.023. [Epub ahead of print] PubMed PMID: 32259477; PubMed Central PMCID: PMC7144857.</p> | No appropriate population sample |
| <p>94: Shen Q, Guo W, Guo T, Li J, He W, Ni S, Ouyang X, Liu J, Xie Y, Tan X, Zhou Z, Peng H. Novel coronavirus infection in children outside of Wuhan, China. Pediatr Pulmonol. 2020 Apr 7. doi: 10.1002/ppul.24762. [Epub ahead of print] PubMed PMID: 32259403.</p>                                                                                                                                                                                            | No appropriate population sample |
| <p>95: Chen CC, Chi CY. Biosafety in the preparation and processing of cytology specimens with potential coronavirus (COVID-19) infection: Perspectives from Taiwan. Cancer Cytopathol. 2020 Apr 7. doi: 10.1002/cncy.22280. [Epub ahead of print] PubMed PMID: 32259402.</p>                                                                                                                                                                                     | No appropriate outcome           |
| <p>96: Yang S, Zhang Y, Cai J, Wang Z. Clinical Characteristics of COVID-19 After Gynecologic Oncology Surgery in Three Women: A Retrospective Review of Medical Records. Oncologist. 2020 Apr 7. doi: 10.1634/theoncologist.2020-0157. [Epub ahead of print] PubMed PMID: 32259322.</p>                                                                                                                                                                          | No appropriate population sample |
| <p>97: Zaigham M, Andersson O. Maternal and Perinatal Outcomes with COVID-19: a systematic review of 108 pregnancies. Acta Obstet Gynecol Scand. 2020 Apr 7. doi:10.1111/aogs.13867. [Epub ahead of print] Review. PubMed PMID: 32259279.</p>                                                                                                                                                                                                                     | No original article              |

|                                                                                                                                                                                                                                                                                                                                                                                                                                    |                                  |
|------------------------------------------------------------------------------------------------------------------------------------------------------------------------------------------------------------------------------------------------------------------------------------------------------------------------------------------------------------------------------------------------------------------------------------|----------------------------------|
| <p>98: Boccia S, Ricciardi W, Ioannidis JPA. What Other Countries Can Learn From Italy During the COVID-19 Pandemic. <i>JAMA Intern Med.</i> 2020 Apr 7. doi:10.1001/jamainternmed.2020.1447. [Epub ahead of print] PubMed PMID: 32259190.</p>                                                                                                                                                                                     | No appropriate outcome           |
| <p>99: Mallick R, Odejinmi F, Clark TJ. Covid 19 pandemic and gynaecological laparoscopic surgery: knowns and unknowns. <i>Facts Views Vis Obgyn.</i> 2020 Apr;12(1):3-7. PubMed PMID: 32259155; PubMed Central PMCID: PMC7117791.</p>                                                                                                                                                                                             | No appropriate outcome           |
| <p>100: Gharebaghi R, Heidary F, Moradi M, Parvizi M. Metronidazole; a Potential Novel Addition to the COVID-19 Treatment Regimen. <i>Arch Acad Emerg Med.</i> 2020 Mar;30(1):e40. eCollection 2020. PubMed PMID: 32259129; PubMed Central PMCID: PMC7114714.</p>                                                                                                                                                                  | No appropriate outcome           |
| <p>101: Gaeta C, Brennessel R. COVID-19: Emergency Medicine Physician Empowered to Shape Perspectives on This Public Health Crisis. <i>Cureus.</i> 2020 Apr 1;12(4):e7504. doi: 10.7759/cureus.7504. PubMed PMID: 32257730; PubMed Central PMCID: PMC7117614.</p>                                                                                                                                                                  | No appropriate outcome           |
| <p>102: Hasan A, Mehmood N, Fergie J. Coronavirus Disease (COVID-19) and Pediatric Patients: A Review of Epidemiology, Symptomatology, Laboratory and Imaging Results to Guide the Development of a Management Algorithm. <i>Cureus.</i> 2020 Mar;31;12(3):e7485. doi: 10.7759/cureus.7485. Review. PubMed PMID: 32257728; PubMed Central PMCID: PMC7123290.</p>                                                                   | No original article              |
| <p>103: Leng Z, Zhu R, Hou W, Feng Y, Yang Y, Han Q, Shan G, Meng F, Du D, Wang S, Fan J, Wang W, Deng L, Shi H, Li H, Hu Z, Zhang F, Gao J, Liu H, Li X, Zhao Y, Yin K, He X, Gao Z, Wang Y, Yang B, Jin R, Stambler I, Lim LW, Su H, Moskalev A, Cano A, Chakrabarti S, Min KJ, Ellison-Hughes G, Caruso C, Jin K, Zhao RC. Transplantation of ACE2(-) Mesenchymal Stem Cells Improves the Outcome of Patients with COVID-19</p> | No appropriate population sample |

|                                                                                                                                                                                                                                                                                                                                                                                                                                                                                                                             |                                  |
|-----------------------------------------------------------------------------------------------------------------------------------------------------------------------------------------------------------------------------------------------------------------------------------------------------------------------------------------------------------------------------------------------------------------------------------------------------------------------------------------------------------------------------|----------------------------------|
| <p>Pneumonia. <i>Aging Dis.</i> 2020 Mar 9;11(2):216-228. doi:10.14336/AD.2020.0228. eCollection 2020 Apr. PubMed PMID: 32257537; PubMedCentral PMCID: PMC7069465.</p>                                                                                                                                                                                                                                                                                                                                                      |                                  |
| <p>104: Asim M, Sathian B, van Teijlingen E, Mekkodathil A, Subramanya SH, Simkhada P. COVID-19 Pandemic: Public Health Implications in Nepal. <i>Nepal J Epidemiol.</i> 2020 Mar 30;10(1):817-820. doi: 10.3126/nje.v10i1.28269. eCollection 2020 Mar. PubMed PMID: 32257511; PubMed Central PMCID: PMC7112957.</p>                                                                                                                                                                                                        | No appropriate outcome           |
| <p>105: Chan PS, Berg RA, Nadkarni VM. Code Blue During the COVID-19 Pandemic. <i>Circ Cardiovasc Qual Outcomes.</i> 2020 Apr 7. doi: 10.1161/CIRCOUTCOMES.120.006779. [Epub ahead of print] PubMed PMID: 32255661.</p>                                                                                                                                                                                                                                                                                                     | No appropriate outcome           |
| <p>106: Abramowicz JS, Basseal JM, Brezinka C, Dall'Asta A, Deng J, Harrison G, Lee JCS, Lim A, Maršal K, Miloro P, Poon LC, Salvesen KÅ, Sande R, Ter Haar G, Westerway SC, Xie MX, Lees C. ISUOG Safety Committee Position Statement on use of personal protective equipment and hazard mitigation in relation to SARS-CoV-2 for practitioners undertaking obstetric and gynecological ultrasound. <i>Ultrasound Obstet Gynecol.</i> 2020 Apr 7. doi: 10.1002/uog.22035. [Epub ahead of print] PubMed PMID: 32255535.</p> | No appropriate outcome           |
| <p>107: Li B, Shen J, Li L, Yu C. Radiographic and Clinical Features of Children with 2019 Novel Coronavirus (COVID-19) Pneumonia. <i>Indian Pediatr.</i> 2020 Apr 7. pii: S097475591600156. [Epub ahead of print] PubMed PMID: 32255437.</p>                                                                                                                                                                                                                                                                               | No appropriate population sample |
| <p>108: Yadav U, Pal R. Challenging Times for Children With Transfusion-dependent Thalassemia Amid the COVID-19 Pandemic. <i>Indian Pediatr.</i> 2020 Apr 7. pii: S097475591600155. [Epub ahead of print] PubMed PMID: 32255436.</p>                                                                                                                                                                                                                                                                                        | No appropriate population sample |

|                                                                                                                                                                                                                                                                                                                                                                                                                                                                                                                                                                                                          |                               |
|----------------------------------------------------------------------------------------------------------------------------------------------------------------------------------------------------------------------------------------------------------------------------------------------------------------------------------------------------------------------------------------------------------------------------------------------------------------------------------------------------------------------------------------------------------------------------------------------------------|-------------------------------|
| <p>109: Rubin GD, Ryerson CJ, Haramati LB, Sverzellati N, Kanne JP, Raof S, Schluger NW, Volpi A, Yim JJ, Martin IBK, Anderson DJ, Kong C, Altes T, Bush A, Desai SR, Goldin J, Goo JM, Humbert M, Inoue Y, Kauczor HU, Luo F, Mazzone PJ, Prokop M, Remy-Jardin M, Richeldi L, Schaefer-Prokop CM, Tomiyama N, Wells AU, Leung AN. The Role of Chest Imaging in Patient Management during the COVID-19 Pandemic: A Multinational Consensus Statement from the Fleischner Society. <i>Radiology</i>. 2020 Apr 7;201365. doi: 10.1148/radiol.2020201365. [Epub ahead of print] PubMed PMID: 32255413.</p> | <p>No appropriate outcome</p> |
| <p>110: Mo Y, Deng L, Zhang L, Lang Q, Liao C, Wang N, Qin M, Huang H. Work stress among Chinese nurses to support Wuhan for fighting against the COVID-19 epidemic. <i>J Nurs Manag</i>. 2020 Apr 7. doi: 10.1111/jonm.13014. [Epub ahead of print] PubMed PMID: 32255222.</p>                                                                                                                                                                                                                                                                                                                          | <p>No appropriate outcome</p> |
| <p>111: Ji T, Chen HL, Xu J, Wu LN, Li JJ, Chen K, Qin G. Lockdown contained the spread of 2019 novel coronavirus disease in Huangshi city, China: Early epidemiological findings. <i>Clin Infect Dis</i>. 2020 Apr 7. pii: ciaa390. doi:10.1093/cid/ciaa390. [Epub ahead of print] PubMed PMID: 32255183.</p>                                                                                                                                                                                                                                                                                           | <p>No appropriate outcome</p> |
| <p>112: Bloch EM, Shoham S, Casadevall A, Sachais BS, Shaz B, Winters JL, vanBuskirk C, Grossman BJ, Joyner M, Henderson JP, Pekosz A, Lau B, Wesolowski A, Katz L, Shan H, Auwaerter PG, Thomas D, Sullivan DJ, Paneth N, Gehrie E, Spitalnik S, Hod E, Pollack L, Nicholson WT, Pirofski LA, Bailey JA, Tobian AA. Deployment of convalescent plasma for the prevention and treatment of COVID-19. <i>J Clin Invest</i>. 2020 Apr 7. pii: 138745. doi: 10.1172/JCI138745. [Epub ahead of print] Review. PubMed PMID: 32254064.</p>                                                                     | <p>No appropriate outcome</p> |

|                                                                                                                                                                                                                                                                                                                                                                                                                                                                                                                                                                                                                               |                               |
|-------------------------------------------------------------------------------------------------------------------------------------------------------------------------------------------------------------------------------------------------------------------------------------------------------------------------------------------------------------------------------------------------------------------------------------------------------------------------------------------------------------------------------------------------------------------------------------------------------------------------------|-------------------------------|
| <p>113: Sheahan TP, Sims AC, Zhou S, Graham RL, Pruijssers AJ, Agostini ML, LeistSR, Schäfer A, Dinnon KH 3rd, Stevens LJ, Chappell JD, Lu X, Hughes TM, GeorgeAS, Hill CS, Montgomery SA, Brown AJ, Bluemling GR, Natchus MG, Saindane M,Kolykhalov AA, Painter G, Harcourt J, Tamin A, Thornburg NJ, Swanstrom R, DenisonMR, Baric RS. An orally bioavailable broad-spectrum antiviral inhibits SARS-CoV-2in human airway epithelial cell cultures and multiple coronaviruses in mice. <i>Sci Transl Med.</i> 2020 Apr 6. pii: eabb5883. doi: 10.1126/scitranslmed.abb5883. [Epubahead of print] PubMed PMID: 32253226.</p> | <p>No appropriate outcome</p> |
| <p>114: Davanzo R. Breast feeding at the time of COVID-19: do not forget expressed mother's milk, please. <i>Arch Dis Child Fetal Neonatal Ed.</i> 2020 Apr 6. pii:fetalneonatal-2020-319149. doi: 10.1136/archdischild-2020-319149. [Epub ahead of print] PubMed PMID: 32253201.</p>                                                                                                                                                                                                                                                                                                                                         | <p>No original article</p>    |
| <p>115: Morand A, Fabre A, Minodier P, Boutin A, Vanel N, Bosdure E, Fournier PE.COVID-19 virus and children: What do we know? <i>Arch Pediatr.</i> 2020Apr;27(3):117-118. doi: 10.1016/j.arcped.2020.03.001. PubMed PMID: 32253003.</p>                                                                                                                                                                                                                                                                                                                                                                                      | <p>No original article</p>    |
| <p>116: Park SE. Epidemiology, virology, and clinical features of severe acuterespiratory syndrome -coronavirus-2 (SARS-CoV-2; Coronavirus Disease-19). <i>ClinExp Pediatr.</i> 2020 Apr 2. doi: 10.3345/cep.2020.00493. [Epub ahead of print]PubMed PMID: 32252141.</p>                                                                                                                                                                                                                                                                                                                                                      | <p>No appropriate outcome</p> |
| <p>117: Choi SH, Kim HW, Kang JM, Kim DH, Cho EY. Epidemiology and Clinical Featuresof Coronavirus disease 2019 in Children. <i>Clin Exp Pediatr.</i> 2020 Apr 6. doi:10.3345/cep.2020.00535. [Epub ahead of print] PubMed PMID: 32252139.</p>                                                                                                                                                                                                                                                                                                                                                                                | <p>No original article</p>    |
| <p>118: Hong X, Xiong J, Feng Z, Shi Y. Extracorporeal membrane oxygenation (ECMO): does it have a role in the treatment of severe COVID-19? <i>Int J Infect Dis.</i> 2020Apr 3. pii: S1201-9712(20)30191-0. doi:</p>                                                                                                                                                                                                                                                                                                                                                                                                         | <p>No appropriate outcome</p> |

|                                                                                                                                                                                                                                                                                                                                                                                  |                               |
|----------------------------------------------------------------------------------------------------------------------------------------------------------------------------------------------------------------------------------------------------------------------------------------------------------------------------------------------------------------------------------|-------------------------------|
| <p>10.1016/j.ijid.2020.03.058. [Epub ahead of print] PubMed PMID: 32251794.</p>                                                                                                                                                                                                                                                                                                  |                               |
| <p>119: Gray PE, Belessis Y. The use of Traditional Chinese Medicines to treat SARS-CoV-2 may cause more harm than good. <i>Pharmacol Res.</i> 2020 Apr 3;104776. doi: 10.1016/j.phrs.2020.104776. [Epub ahead of print] PubMed PMID: 32251726; PubMedCentral PMCID: PMC7129235.</p>                                                                                             | <p>No appropriate outcome</p> |
| <p>120: Weber Lebrun EE, Moawad NS, Rosenberg EI, Morey TE, Davies L, Collins WO, Smulian JC. COVID-19 Pandemic: Staged Management of Surgical Services for Gynecology and Obstetrics. <i>Am J Obstet Gynecol.</i> 2020 Apr 3. pii: S0002-9378(20)30389-6. doi: 10.1016/j.ajog.2020.03.038. [Epub ahead of print] PubMed PMID: 32251649.</p>                                     | <p>No appropriate outcome</p> |
| <p>121: Favalli EG, Biggioggero M, Maioli G, Caporali R. Baricitinib for COVID-19: a suitable treatment? <i>Lancet Infect Dis.</i> 2020 Apr 3. pii: S1473-3099(20)30262-0. doi: 10.1016/S1473-3099(20)30262-0. [Epub ahead of print] PubMed PMID: 32251638.</p>                                                                                                                  | <p>No appropriate outcome</p> |
| <p>122: Bayham J, Fenichel EP. Impact of school closures for COVID-19 on the US health-care workforce and net mortality: a modelling study. <i>Lancet Public Health.</i> 2020 Apr 3. pii: S2468-2667(20)30082-7. doi: 10.1016/S2468-2667(20)30082-7. [Epub ahead of print] PubMed PMID: 32251626.</p>                                                                            | <p>No appropriate outcome</p> |
| <p>123: Zamberg I, Manzano S, Posfay-Barbe K, Windisch O, Agoritsas T, Schiffer E. Utilization of a mobile platform for the dissemination of validated institutional measurements during COVID-19 outbreak: A practical example in the Children's Hospital. <i>JMIR Public Health Surveill.</i> 2020 Apr 3. doi: 10.2196/18668. [Epub ahead of print] PubMed PMID: 32250958.</p> | <p>No appropriate outcome</p> |

|                                                                                                                                                                                                                                                                                                                    |                                         |
|--------------------------------------------------------------------------------------------------------------------------------------------------------------------------------------------------------------------------------------------------------------------------------------------------------------------|-----------------------------------------|
| <p>124: Mallineni SK, Innes NP, Raggio DP, Araujo MP, Robertson MD, Jayaraman J. Coronavirus Disease (COVID-19): Characteristics in children and considerations for Dentists providing their care. <i>Int J Paediatr Dent</i>. 2020 Apr 6. doi:10.1111/ipd.12653. [Epub ahead of print] PubMed PMID: 32250505.</p> | <p>No appropriate outcome</p>           |
| <p>125: Kaufman KR, Petkova E, Bhui KS, Schulze TG. A global needs assessment in times of a global crisis: world psychiatry response to the COVID-19 pandemic. <i>BJPsych Open</i>. 2020 Apr 6:1-11. doi: 10.1192/bjo.2020.25. [Epub ahead of print] PubMed PMID: 32250235.</p>                                    | <p>No appropriate outcome</p>           |
| <p>126: Joob B, Wiwanitkit V. Hemorrhagic Problem Among the Patients With COVID-19: Clinical Summary of 41 Thai Infected Patients. <i>Clin Appl Thromb Hemost</i>. 2020 Jan-Dec;26:1076029620918308. doi: 10.1177/1076029620918308. PubMed PMID:32250159</p>                                                       | <p>No appropriate outcome</p>           |
| <p>127: Canarutto D, Priolo A, Russo G, Pitea M, Vigone MC, Barera G. COVID-19 infection in a paucisymptomatic infant: Raising the index of suspicion in epidemic settings. <i>Pediatr Pulmonol</i>. 2020 Apr 6. doi: 10.1002/ppul.24754. [Epub ahead of print] PubMed PMID: 32250049.</p>                         | <p>No appropriate population sample</p> |
| <p>128: Han YN, Feng ZW, Sun LN, Ren XX, Wang H, Xue YM, Wang Y, Fang Y. A comparative-descriptive analysis of clinical characteristics in 2019-Coronavirus-infected children and adults. <i>J Med Virol</i>. 2020 Apr 6. doi:10.1002/jmv.25835. [Epub ahead of print] PubMed PMID: 32249943.</p>                  | <p>No appropriate population sample</p> |
| <p>129: Gidlöf S, Savchenko J, Brune T, Josefsson H. COVID-19 in pregnancy with comorbidities: More liberal testing strategy is needed. <i>Acta Obstet Gynecol Scand</i>. 2020 Apr 6. doi: 10.1111/aogs.13862. [Epub ahead of print] PubMed PMID:32249924</p>                                                      | <p>Included</p>                         |

|                                                                                                                                                                                                                                                                                                                                                                                              |                        |
|----------------------------------------------------------------------------------------------------------------------------------------------------------------------------------------------------------------------------------------------------------------------------------------------------------------------------------------------------------------------------------------------|------------------------|
| <p>130: Li N, Han L, Peng M, Lv Y, Ouyang Y, Liu K, Yue L, Li Q, Sun G, Chen L, YangL. Maternal and neonatal outcomes of pregnant women with COVID-19 pneumonia: a case-control study. Clin Infect Dis. 2020 Mar 30. pii: ciaa352. doi:10.1093/cid/ciaa352. [Epub ahead of print] PubMed PMID: 32249918.</p>                                                                                 | Overlapping data       |
| <p>131: Kalafat E, Yaprak E, Cinar G, Varli B, Ozisik S, Uzun C, Azap A, Koc A. Lung ultrasound and computed tomographic findings in pregnant woman with COVID-19. Ultrasound Obstet Gynecol. 2020 Apr 6. doi: 10.1002/uog.22034. [Epub ahead of print] PubMed PMID: 32249471.</p>                                                                                                           | Included               |
| <p>132: Rey Galán C, Manrique de Lara LA, Antón Gamero M, Cano Garcinuño A, Solís Sánchez G. [Coronavirus infection (COVID-19) in Anales de Pediatría]. An Pediatr (Barc). 2020 Apr 2. pii: S1695-4033(20)30132-6. doi:10.1016/j.anpedi.2020.03.004. [Epub ahead of print] Spanish. PubMed PMID:32249164; PubMed Central PMCID: PMC7128409.</p>                                              | No original article    |
| <p>133: Jiao WY, Wang LN, Liu J, Fang SF, Jiao FY, Pettoello-Mantovani M, Somekh E. Behavioral and Emotional Disorders in Children during the COVID-19 Epidemic. JPediatr. 2020 Apr 2. pii: S0022-3476(20)30336-X. doi:10.1016/j.jpeds.2020.03.013. [Epub ahead of print] PubMed PMID: 32248989; PubMed Central PMCID: PMC7127630.</p>                                                       | No appropriate outcome |
| <p>134: Sahu KK, Mishra AK, Lal A. A twin challenge to handle: COVID-19 with pregnancy. J Med Virol. 2020 Apr 5. doi: 10.1002/jmv.25784. [Epub ahead of print] PubMed PMID: 32248565.</p>                                                                                                                                                                                                    | No original article    |
| <p>135: Poon LC, Yang H, Kapur A, Melamed N, Dao B, Divakar H, David McIntyre H, Kihara AB, Ayres-de-Campos D, Ferrazzi EM, Carlo Di Renzo G, Hod M. Global interim guidance on coronavirus disease 2019 (COVID-19) during pregnancy and puerperium from FIGO and allied partners: Information for healthcare professionals. Int J Gynaecol Obstet. 2020 Apr 4. doi: 10.1002/ijgo.13156.</p> | No original article    |



|                                                                                                                                                                                                                                                                                                                                                                                                                                                                                                                                                                                                                          |                                         |
|--------------------------------------------------------------------------------------------------------------------------------------------------------------------------------------------------------------------------------------------------------------------------------------------------------------------------------------------------------------------------------------------------------------------------------------------------------------------------------------------------------------------------------------------------------------------------------------------------------------------------|-----------------------------------------|
| <p>[Epub ahead of print] PubMed PMID: 32248521.</p>                                                                                                                                                                                                                                                                                                                                                                                                                                                                                                                                                                      |                                         |
| <p>136: Grech V. Unknown unknowns - COVID-19 and potential global mortality. <i>EarlyHum Dev.</i> 2020 Mar 31;144:105026. doi: 10.1016/j.earlhumdev.2020.105026. [Epub ahead of print] PubMed PMID: 32247898.</p>                                                                                                                                                                                                                                                                                                                                                                                                        | <p>No appropriate outcome</p>           |
| <p>137: Morris SN, Fader AN, Milad MP, Dionisi HJ. Understanding the "Scope" of the Problem: Why Laparoscopy is Considered Safe During the COVID-19 Pandemic. <i>J MinimInvasive Gynecol.</i> 2020 Apr 2. pii: S1553-4650(20)30171-0. doi:10.1016/j.jmig.2020.04.002. [Epub ahead of print] PubMed PMID: 32247882; PubMedCentral PMCID: PMC7129473.</p>                                                                                                                                                                                                                                                                  | <p>No appropriate outcome</p>           |
| <p>138: Norsa L, Indriolo A, Sansotta N, Cosimo P, Greco S, D'Antiga L. Uneventful course in IBD patients during SARS-CoV-2 outbreak in northern Italy. <i>Gastroenterology.</i> 2020 Apr 2. pii: S0016-5085(20)30445-5. doi:10.1053/j.gastro.2020.03.062. [Epub ahead of print] PubMed PMID: 32247695.</p>                                                                                                                                                                                                                                                                                                              | <p>No appropriate population sample</p> |
| <p>139: Akladios C, Azais H, Ballester M, Bendifallah S, Bolze PA, Bourdel N, Bricou A, Canlorbe G, Carcopino X, Chauvet P, Collinet P, Coutant C, Dabi Y, Dion L, Gauthier T, Graesslin O, Huchon C, Koskas M, Kridelka F, Lavoue V, Lecointre L, Mezzadri M, Mimoun C, Ouldamer L, Raimond E, Touboul C. Recommendations for the surgical management of gynecological cancers during the COVID-19 pandemic -FRANCOGYN group for the CNGOF. <i>J Gynecol Obstet Hum Reprod.</i> 2020 Apr 1:101729. doi: 10.1016/j.jogoh.2020.101729. [Epub ahead of print] PubMed PMID: 32247066; PubMed Central PMCID: PMC7118621.</p> | <p>No appropriate population sample</p> |

|                                                                                                                                                                                                                                                                                                                                                                                           |                        |
|-------------------------------------------------------------------------------------------------------------------------------------------------------------------------------------------------------------------------------------------------------------------------------------------------------------------------------------------------------------------------------------------|------------------------|
| <p>140: Al-Tawfiq JA. Middle East Respiratory Syndrome Coronavirus (MERS-CoV) and COVID-19 infection during pregnancy. <i>Travel Med Infect Dis.</i> 2020 Apr 1:101641. doi: 10.1016/j.tmaid.2020.101641. [Epub ahead of print] PubMed PMID: 32247017; PubMed Central PMCID: PMC7118624.</p>                                                                                              | No original article    |
| <p>141: Baker T, Schell CO, Petersen DB, Sawe H, Khalid K, Mndolo S, Rylance J, McAuley DF, Roy N, Marshall J, Wallis L, Molyneux E. Essential care of critical illness must not be forgotten in the COVID-19 pandemic. <i>Lancet.</i> 2020 Apr 1. pii: S0140-6736(20)30793-5. doi: 10.1016/S0140-6736(20)30793-5. [Epub ahead of print] PubMed PMID: 32246914.</p>                       | No appropriate outcome |
| <p>142: He Y, Lin Z, Tang D, Yang Y, Wang T, Yang M. Strategic plan for management of COVID-19 in paediatric haematology and oncology departments. <i>Lancet Haematol.</i> 2020 Apr 1. pii: S2352-3026(20)30104-6. doi: 10.1016/S2352-3026(20)30104-6. [Epub ahead of print] PubMed PMID: 32246912.</p>                                                                                   | No appropriate outcome |
| <p>143: Furlow B. US NICUs and donor milk banks brace for COVID-19. <i>Lancet Child Adolesc Health.</i> 2020 Apr 1. pii: S2352-4642(20)30103-6. doi:10.1016/S2352-4642(20)30103-6. [Epub ahead of print] PubMed PMID: 32246910.</p>                                                                                                                                                       | No appropriate outcome |
| <p>144: Altena E, Baglioni C, Espie CA, Ellis J, Gavrilloff D, Holzinger B, Schlarb A, Frase L, Jernelöv S, Riemann D. Dealing with sleep problems during homeconfinement due to the COVID-19 outbreak: practical recommendations from a taskforce of the European CBT-I Academy. <i>J Sleep Res.</i> 2020 Apr 4. doi:10.1111/jsr.13052. [Epub ahead of print] PubMed PMID: 32246787.</p> | No appropriate outcome |
| <p>145: Nagata JM. Rapid Scale-Up of Telehealth during the COVID-19 Pandemic and Implications for Subspecialty Care in Rural Areas. <i>J Rural Health.</i> 2020 Apr 3. doi: 10.1111/jrh.12433. [Epub ahead of print] PubMed PMID: 32246490.</p>                                                                                                                                           | No appropriate outcome |

|                                                                                                                                                                                                                                                                                                                            |                                         |
|----------------------------------------------------------------------------------------------------------------------------------------------------------------------------------------------------------------------------------------------------------------------------------------------------------------------------|-----------------------------------------|
| <p>146: Matava CT, Yu J, Denning S. Clear plastic drapes may be effective at limiting aerosolization and droplet spray during extubation: implications for COVID-19. <i>Can J Anaesth.</i> 2020 Apr 3. doi: 10.1007/s12630-020-01649-w. [Epub ahead of print] PubMed PMID: 32246431; PubMed Central PMCID: PMC7124129.</p> | <p>No appropriate outcome</p>           |
| <p>147: South AM, Tomlinson L, Edmonston D, Hiremath S, Sparks MA. Controversies of renin-angiotensin system inhibition during the COVID-19 pandemic. <i>Nat Rev Nephrol.</i> 2020 Apr 3. doi: 10.1038/s41581-020-0279-4. [Epub ahead of print] PubMed PMID: 32246101.</p>                                                 | <p>No appropriate outcome</p>           |
| <p>148: Henrickson SE. Learning from our immunological history: What can SARS-CoV teach us about SARS-CoV-2? <i>Sci Immunol.</i> 2020 Apr 3;5(46). pii: eabb8618. doi:10.1126/sciimmunol.abb8618. PubMed PMID: 32245885.</p>                                                                                               | <p>No appropriate outcome</p>           |
| <p>149: Kickbusch I, Leung GM, Bhutta ZA, Matsoso MP, Ihekweazu C, Abbasi K. Covid-19: how a virus is turning the world upside down. <i>BMJ.</i> 2020 Apr 3;369:m1336. doi: 10.1136/bmj.m1336. PubMed PMID: 32245802.</p>                                                                                                  | <p>No appropriate outcome</p>           |
| <p>150: Gardner W, States D, Bagley N. The Coronavirus and the Risks to the Elderly in Long-Term Care. <i>J Aging Soc Policy.</i> 2020 Apr 3:1-6. doi:10.1080/08959420.2020.1750543. [Epub ahead of print] PubMed PMID: 32245346.</p>                                                                                      | <p>No appropriate population sample</p> |
| <p>151: Narzisi A. Handle the Autism Spectrum Condition During Coronavirus (COVID-19) Stay At Home period: Ten Tips for Helping Parents and Caregivers of Young Children. <i>Brain Sci.</i> 2020 Apr 1;10(4). pii: E207. doi:10.3390/brainsci10040207. PubMed PMID: 32244776.</p>                                          | <p>No appropriate outcome</p>           |

|                                                                                                                                                                                                                                                                                                                                                                                                                                                                                                 |                                         |
|-------------------------------------------------------------------------------------------------------------------------------------------------------------------------------------------------------------------------------------------------------------------------------------------------------------------------------------------------------------------------------------------------------------------------------------------------------------------------------------------------|-----------------------------------------|
| <p>181: CDC COVID-19 Response Team. Preliminary Estimates of the Prevalence of Selected Underlying Health Conditions Among Patients with Coronavirus Disease 2019 - United States, February 12-March 28, 2020. <i>MMWR Morb Mortal Wkly Rep.</i> 2020 Apr 3;69(13):382-386. doi: 10.15585/mmwr.mm6913e2. PubMed PMID: 32240123; PubMed Central PMCID: PMC7119513.</p>                                                                                                                           | <p>No appropriate outcome</p>           |
| <p>191: Eduardo C. [The novel coronavirus covid-19 pandemic]. <i>Rev Fac Cien Med Univ Nac Cordoba.</i> 2020 Mar 18;77(1):1-3. doi: 10.31053/1853.0605.v77.n1.27935.Spanish. PubMed PMID: 32238250.</p>                                                                                                                                                                                                                                                                                         | <p>No original article</p>              |
| <p>203: Russell TW, Hellewell J, Jarvis CI, van Zandvoort K, Abbott S, Ratnayake R, Cmmid Covid-Working Group, Flasche S, Eggo RM, Edmunds WJ, Kucharski AJ. Estimating the infection and case fatality ratio for coronavirus disease (COVID-19) using age-adjusted data from the outbreak on the Diamond Princess cruise ship, February 2020. <i>Euro Surveill.</i> 2020 Mar;25(12). doi:10.2807/1560-7917.ES.2020.25.12.2000256. PubMed PMID: 32234121; PubMed Central PMCID: PMC7118348.</p> | <p>No appropriate population sample</p> |
| <p>240: Udugama B, Kadhiresan P, Kozlowski HN, Malekjahani A, Osborne M, Li VYC, Chen H, Mubareka S, Gubbay JB, Chan WCW. Diagnosing COVID-19: The Disease and Tools for Detection. <i>ACS Nano.</i> 2020 Apr 9. doi: 10.1021/acsnano.0c02624. [Epub ahead of print] PubMed PMID: 32223179; PubMed Central PMCID: PMC7144809.</p>                                                                                                                                                               | <p>No appropriate outcome</p>           |
| <p>370: Cruz AT, Zeichner SL. COVID-19 in Children: Initial Characterization of the Pediatric Disease. <i>Pediatrics.</i> 2020 Mar 16. pii: e20200834. doi:10.1542/peds.2020-0834. [Epub ahead of print] PubMed PMID: 32179659.</p>                                                                                                                                                                                                                                                             | <p>No original article</p>              |

|                                                                                                                                                                                                                                                                                                                                                                                                                                                                                                                                                                                                                                                           |                                         |
|-----------------------------------------------------------------------------------------------------------------------------------------------------------------------------------------------------------------------------------------------------------------------------------------------------------------------------------------------------------------------------------------------------------------------------------------------------------------------------------------------------------------------------------------------------------------------------------------------------------------------------------------------------------|-----------------------------------------|
| <p>1: Molloy EJ, Bearer CF. COVID-19 in children and altered inflammatory responses. <i>Pediatr Res.</i> 2020 Apr 3. doi: 10.1038/s41390-020-0881-y. [Epub ahead of print] PubMed PMID: 32244248.</p>                                                                                                                                                                                                                                                                                                                                                                                                                                                     | <p>No appropriate population sample</p> |
| <p>2: Liu H, Wang LL, Zhao SJ, Kwak-Kim J, Mor G, Liao AH. Why are pregnant women susceptible to COVID-19? An immunological viewpoint. <i>J Reprod Immunol.</i> 2020 Mar 19;139:103122. doi: 10.1016/j.jri.2020.103122. [Epub ahead of print] Review. PubMed PMID: 32244166.</p>                                                                                                                                                                                                                                                                                                                                                                          | <p>No original article</p>              |
| <p>3: Zhang B, Liu S, Tan T, Huang W, Dong Y, Chen L, Chen Q, Zhang L, Zhong Q, Zhang X, Zou Y, Zhang S. Treatment with convalescent plasma for critically ill patients with SARS-CoV-2 infection. <i>Chest.</i> 2020 Mar 31. pii: S0012-3692(20)30571-7. doi: 10.1016/j.chest.2020.03.039. [Epub ahead of print]</p>                                                                                                                                                                                                                                                                                                                                     | <p>No useful data</p>                   |
| <p>4: Ngoi N, Lim J, Ow S, Jen WY, Lee M, Teo W, Ho J, Sundar R, Tung ML, Lee YM, Ngo E, Lim SW, Ong J, Lim F, Bonney G, Vellayappan B, Ho F, Tey J, Chan N, de Mel S, Poon M, Lee SY, Koh LP, Liu TC, Tan LK, Wong A, Wong A, Lim SE, Yeoh A, Wong JE, Tan D, Goh BC, Chng WJ, Soo R, Chee CE, Chee YL, Lee SC, Jeyasekharan AD; National University Cancer Institute, Singapore (NCIS). A segregated-team model to maintain cancer care during the COVID-19 outbreak at an academic center in Singapore. <i>Ann Oncol.</i> 2020 Mar 31. pii: S0923-7534(20)36410-3. doi: 10.1016/j.annonc.2020.03.306. [Epub ahead of print] PubMed PMID: 32243893.</p> | <p>No appropriate population sample</p> |
| <p>5: Dalton L, Rapa E, Stein A. Protecting the psychological health of children through effective communication about COVID-19. <i>Lancet Child Adolesc Health.</i> 2020 Mar 31. pii: S2352-4642(20)30097-3. doi: 10.1016/S2352-4642(20)30097-3. [Epub ahead of print] PubMed PMID: 32243784.</p>                                                                                                                                                                                                                                                                                                                                                        | <p>No appropriate outcome</p>           |

|                                                                                                                                                                                                                                                                                                                                                                                                                                                                                                                                                                                                                                                                                                                                                                                                               |                                         |
|---------------------------------------------------------------------------------------------------------------------------------------------------------------------------------------------------------------------------------------------------------------------------------------------------------------------------------------------------------------------------------------------------------------------------------------------------------------------------------------------------------------------------------------------------------------------------------------------------------------------------------------------------------------------------------------------------------------------------------------------------------------------------------------------------------------|-----------------------------------------|
| <p>6: Rosenthal DM, Ucci M, Heys M, Hayward A, Lakhanpaul M. Impacts of COVID-19 on vulnerable children in temporary accommodation in the UK. <i>Lancet Public Health</i>. 2020 Mar 31. pii: S2468-2667(20)30080-3. doi: 10.1016/S2468-2667(20)30080-3. [Epub ahead of print] PubMed PMID: 32243776.</p>                                                                                                                                                                                                                                                                                                                                                                                                                                                                                                      | <p>No appropriate population sample</p> |
| <p>7: Lin J, Duan J, Tan T, Fu Z, Dai J. The isolation period should be longer: Lesson from a child infected with SARS-CoV-2 in Chongqing, China. <i>Pediatr Pulmonol</i>. 2020 Apr 3. doi: 10.1002/ppul.24763. [Epub ahead of print] PubMed PMID: 32243729</p>                                                                                                                                                                                                                                                                                                                                                                                                                                                                                                                                               | <p>No appropriate population sample</p> |
| <p>8: Yonker LM, Shen K, Kinane TB. Lessons unfolding from pediatric cases of COVID-19 disease caused by SARS-CoV-2 infection. <i>Pediatr Pulmonol</i>. 2020 Apr 3. doi: 10.1002/ppul.24748. [Epub ahead of print] PubMed PMID: 32243722.</p>                                                                                                                                                                                                                                                                                                                                                                                                                                                                                                                                                                 | <p>No appropriate population sample</p> |
| <p>9: Schiariti V. Los derechos humanos de los niños con discapacidad durante emergencias sanitarias: el desafío de COVID-19. <i>Dev Med Child Neurol</i>. 2020 Apr 3. doi: 10.1111/dmcn.14529. [Epub ahead of print] PubMed PMID: 32243566.</p>                                                                                                                                                                                                                                                                                                                                                                                                                                                                                                                                                              | <p>No appropriate population sample</p> |
| <p>10: Shander A, Goobie SM, Warne MA, Aapro M, Bisbe E, Perez-Calatayud AA, Callum J, Cushing MM, Dyer WB, Erhard J, Faraoni D, Farmer S, Fedorova T, Frank SM, Froessler B, Gombotz H, Gross I, Guinn NR, Haas T, Hamdorf J, Isbister JP, Javidroozi M, Ji H, Kim YW, Kor DJ, Kurz J, Lasocki S, Leahy MF, Lee CK, Lee JJ, Louw V, Meier J, Mezzacasa A, Munoz M, Ozawa S, Pavesi M, Shander N, Spahn DR, Spiess BD, Thomson J, Trentino K, Zenger C, Hofmann A; International Foundation of Patient Blood Management (IFPBM) and Society for the Advancement of Blood Management (SABM) Work Group. The Essential Role of Patient Blood Management in a Pandemic: A Call for Action. <i>Anesth Analg</i>. 2020 Mar 31. doi: 10.1213/ANE.0000000000004844. [Epub ahead of print] PubMed PMID: 32243296.</p> | <p>No appropriate outcome</p>           |

|                                                                                                                                                                                                                                                                                                                                                                                                                                                                                                                                                                                       |                                  |
|---------------------------------------------------------------------------------------------------------------------------------------------------------------------------------------------------------------------------------------------------------------------------------------------------------------------------------------------------------------------------------------------------------------------------------------------------------------------------------------------------------------------------------------------------------------------------------------|----------------------------------|
| <p>11: Bong CL, Brasher C, Chikumba E, McDougall R, Mellin-Olsen J, Enright A. TheCOVID-19 Pandemic: Effects on Low and Middle-Income Countries. <i>Anesth Analg.</i> 2020Apr 1. doi: 10.1213/ANE.0000000000004846. [Epub ahead of print] PubMed PMID:32243287</p>                                                                                                                                                                                                                                                                                                                    | No appropriate outcome           |
| <p>12: Davanzo R, Moro G, Sandri F, Agosti M, Moretti C, Mosca F. Breastfeeding and Coronavirus Disease-2019. Ad interim indications of the Italian Society ofNeonatology endorsed by the Union of European Neonatal &amp; Perinatal Societies.<i>Matern Child Nutr.</i> 2020 Apr 3:e13010. doi: 10.1111/mcn.13010. [Epub ahead ofprint] Review. PubMed PMID: 32243068.</p>                                                                                                                                                                                                           | No original article              |
| <p>13: Skulstad H, Cosyns B, Popescu BA, Galderisi M, Salvo GD, Donal E, Petersen S,Gimelli A, Haugaa KH, Muraru D, Almeida AG, Schulz-Menger J, Dweck MR, Pontone G,Sade LE, Gerber B, Maurovich-Horvat P, Bharucha T, Cameli M, Magne J, Westwood M,Maurer G, Edvardsen T. COVID-19 pandemic and cardiac imaging: EACVIrecommendations on precautions, indications, prioritization, and protection forpatients and healthcare personnel. <i>Eur Heart J Cardiovasc Imaging.</i> 2020 Apr 3.pii: jeaa072. doi: 10.1093/ehjci/jeaa072. [Epub ahead of print] PubMed PMID:32242891</p> | No appropriate population sample |
| <p>14: Marinelli KA, Lawrence RM. Safe Handling of Containers of Expressed HumanMilk in all Settings During the SARS-CoV-2 (COVID-19) Pandemic. <i>J Hum Lact.</i> 2020 Apr 3:890334420919083. doi: 10.1177/0890334420919083. [Epub ahead of print]PubMed PMID: 32242762.</p>                                                                                                                                                                                                                                                                                                         | No appropriate outcome           |
| <p>15: Du Y, Tu L, Zhu P, Mu M, Wang R, Yang P, Wang X, Hu C, Ping R, Hu P, Li T,Cao F, Chang C, Hu Q, Jin Y, Xu G. Clinical Features of 85 Fatal Cases ofCOVID-19 from Wuhan: A Retrospective Observational Study. <i>Am J Respir Crit CareMed.</i> 2020 Apr 3. doi:</p>                                                                                                                                                                                                                                                                                                             | No appropriate population sample |

|                                                                                                                                                                                                                                                                                                                                                                                                                                                                                                                           |                                  |
|---------------------------------------------------------------------------------------------------------------------------------------------------------------------------------------------------------------------------------------------------------------------------------------------------------------------------------------------------------------------------------------------------------------------------------------------------------------------------------------------------------------------------|----------------------------------|
| 10.1164/rccm.202003-0543OC. [Epub ahead of print] PubMedPMID: 32242738.                                                                                                                                                                                                                                                                                                                                                                                                                                                   |                                  |
| 16: Siskind D, Honer WG, Clark S, Correll CU, Hasan A, Howes O, Kane JM, KellyDL, Laitman R, Lee J, MacCabe JH, Myles N, Nielsen J, Schulte PF, Taylor D, Verdoux H, Wheeler A, Freudenreich O. Consensus statement on the use of clozapineduring the COVID-19 pandemic. J Psychiatry Neurosci. 2020 Apr 3;45(3):2. doi:10.1503/jpn.200061. [Epub ahead of print] PubMed PMID: 32242646.                                                                                                                                  | No appropriate outcome           |
| 17: Kim S, Kim YJ, Peck KR, Jung E. School Opening Delay Effect on TransmissionDynamics of Coronavirus Disease 2019 in Korea: Based on Mathematical Modeling andSimulation Study. J Korean Med Sci. 2020 Apr 6;35(13):e143. doi:10.3346/jkms.2020.35.e143. PubMed PMID: 32242349.                                                                                                                                                                                                                                         | No appropriate outcome           |
| 18: Kim ES, Chin BS, Kang CK, Kim NJ, Kang YM, Choi JP, Oh DH, Kim JH, Koh B, KimSE, Yun NR, Lee JH, Kim JY, Kim Y, Bang JH, Song KH, Kim HB, Chung KH, Oh MD;Korea National Committee for Clinical Management of COVID-19. Clinical Course andOutcomes of Patients with Severe Acute Respiratory Syndrome Coronavirus 2Infection: a Preliminary Report of the First 28 Patients from the Korean CohortStudy on COVID-19. J Korean Med Sci. 2020 Apr 6;35(13):e142. doi:10.3346/jkms.2020.35.e142. PubMed PMID: 32242348. | No appropriate population sample |
| 19: Kimmig R, Verheijen RHM, Rudnicki M; SERGS Council. Robot assisted surgeryduring the COVID-19 pandemic, especially for gynecological cancer: a statement ofthe Society of European Robotic Gynaecological Surgery (SERGS). J Gynecol Oncol. 2020 Apr 3. doi: 10.3802/jgo.2020.31.e59. [Epub ahead of print] PubMed PMID:32242340                                                                                                                                                                                      | No appropriate population sample |



|                                                                                                                                                                                                                                                                                                                                                                                                                                                                                                     |                                         |
|-----------------------------------------------------------------------------------------------------------------------------------------------------------------------------------------------------------------------------------------------------------------------------------------------------------------------------------------------------------------------------------------------------------------------------------------------------------------------------------------------------|-----------------------------------------|
| <p>20: Scuccimarri R, Sutton E, Fitzcharles MA. Hydroxychloroquine: a potentialethical dilemma for rheumatologists during the COVID-19 pandemic. <i>J Rheumatol.</i>2020 Apr 2. pii: jrheum.200369. doi: 10.3899/jrheum.200369. [Epub ahead of print]PubMed PMID: 32241801.</p>                                                                                                                                                                                                                     | <p>No appropriate outcome</p>           |
| <p>21: Dong Y, Wang L, Burgner DP, Miller JE, Song Y, Ren X, Li Z, Xing Y, Ma J,Sawyer SM, Patton GC. Infectious diseases in children and adolescents in China:analysis of national surveillance data from 2008 to 2017. <i>BMJ.</i> 2020 Apr2;369:m1043. doi: 10.1136/bmj.m1043. PubMed PMID: 32241761.</p>                                                                                                                                                                                        | <p>No appropriate population sample</p> |
| <p>22: Calvo C, Tagarro A, Otheo E, Epalza C; Grupo de Seguimiento de la Infecciónpor SARS-CoV-2 en la Comunidad de Madrid; Miembros del Grupo de Seguimiento de laInfección por SARS-CoV-2 en la Comunidad de Madrid. [Epidemiological update onSARS-CoV-2 infection in Spain. Comments on the management of infection inpediatrics]. <i>An Pediatr (Barc).</i> 2020 Mar 30. pii: S1695-4033(20)30097-7. doi:10.1016/j.anpedi.2020.03.001. [Epub ahead of print] Spanish. PubMed PMID:32241653</p> | <p>No appropriate population sample</p> |
| <p>23: Qiu L, Liu X, Xiao M, Xie J, Cao W, Liu Z, Morse A, Xie Y, Li T, Zhu L.SARS-CoV-2 is not detectable in the vaginal fluid of women with severe COVID-19infection. <i>Clin Infect Dis.</i> 2020 Apr 2. pii: ciaa375. doi: 10.1093/cid/ciaa375.[Epub ahead of print] PubMed PMID: 32241022.</p>                                                                                                                                                                                                 | <p>No appropriate population sample</p> |
| <p>24: Salman S, Salem ML. Routine childhood immunization may protect againstCOVID-19. <i>Med Hypotheses.</i> 2020 Mar 25;140:109689. doi:10.1016/j.mehy.2020.109689. [Epub ahead of print] PubMed PMID: 32240961.</p>                                                                                                                                                                                                                                                                              | <p>No appropriate population sample</p> |
| <p>25: Weaver MS, Wiener L. Applying Palliative Care Principles to Communicate with Children about COVID-19. <i>J Pain Symptom Manage.</i> 2020 Mar 30. pii:S0885-3924(20)30171-8. doi:</p>                                                                                                                                                                                                                                                                                                         | <p>No appropriate outcome</p>           |

|                                                                                                                                                                                                                                                                                                                                                                                                                                                                                                    |                                  |
|----------------------------------------------------------------------------------------------------------------------------------------------------------------------------------------------------------------------------------------------------------------------------------------------------------------------------------------------------------------------------------------------------------------------------------------------------------------------------------------------------|----------------------------------|
| 10.1016/j.jpainsymman.2020.03.020. [Epub ahead of print] PubMed PMID: 32240751.                                                                                                                                                                                                                                                                                                                                                                                                                    |                                  |
| 26: Giulio M, Maggioni D, Montroni I, Ugolini G, Capelli P, Ceppi L, Bonfanti P, Mariani A, Achilli F. Being a doctor will never be the same after the COVID-19 pandemic. <i>Am J Med.</i> 2020 Mar 30. pii: S0002-9343(20)30216-3. doi:10.1016/j.amjmed.2020.03.003. [Epub ahead of print] PubMed PMID: 32240630.                                                                                                                                                                                 | No appropriate outcome           |
| 27: Green CA, Quraishi MN, Shabir S, Sharma N, Hansen R, Gaya DR, Hart AL, Loman NJ, Iqbal TH. Screening faecal microbiota transplant donors for SARS-CoV-2 by molecular testing of stool is the safest way forward. <i>Lancet Gastroenterol Hepatol.</i> 2020 Mar 30. pii: S2468-1253(20)30089-3. doi:10.1016/S2468-1253(20)30089-3. [Epub ahead of print] PubMed PMID: 32240618.                                                                                                                 | No appropriate population sample |
| 28: Casanova M, Bagliacca EP, Silva M, Patriarca C, Veneroni L, Clerici CA, Spreafico F, Luksch R, Terenziani M, Meazza C, Podda M, Biassoni V, Schiavello E, Chiaravalli S, Puma N, Bergamaschi L, Gattuso G, Sironi G, Massimino M, Ferrari A. How young patients with cancer perceive the Covid-19 (coronavirus) epidemic in Milan, Italy: is there room for other fears? <i>Pediatr Blood Cancer.</i> 2020 Apr 2; e28318. doi: 10.1002/pbc.28318. [Epub ahead of print] PubMed PMID: 32240567. | No appropriate population sample |
| 29: Turer RW, Jones I, Rosenbloom ST, Slovis C, Ward MJ. Electronic Personal Protective Equipment: A Strategy to Protect Emergency Department Providers in the Age of COVID-19. <i>J Am Med Inform Assoc.</i> 2020 Apr 2. pii: ocaa048. doi:10.1093/jamia/ocaa048. [Epub ahead of print] PubMed PMID: 32240303.                                                                                                                                                                                    | No appropriate outcome           |

|                                                                                                                                                                                                                                                                                                                                                                                                                                                                  |                                         |
|------------------------------------------------------------------------------------------------------------------------------------------------------------------------------------------------------------------------------------------------------------------------------------------------------------------------------------------------------------------------------------------------------------------------------------------------------------------|-----------------------------------------|
| <p>30: Geldsetzer P. Use of Rapid Online Surveys to Assess People's Perceptions During Infectious Disease Outbreaks: A Cross-sectional Survey on COVID-19. <i>J Med Internet Res.</i> 2020 Apr 2;22(4):e18790. doi: 10.2196/18790. PubMed PMID: 32240094.</p>                                                                                                                                                                                                    | <p>No appropriate outcome</p>           |
| <p>31: Bouffet E, Challinor J, Sullivan M, Biondi A, Rodriguez-Galindo C, Pritchard-Jones K. Early advice on managing children with cancer during the COVID-19 pandemic and a call for sharing experiences. <i>Pediatr Blood Cancer.</i> 2020 Apr 2:e28327. doi: 10.1002/pbc.28327. [Epub ahead of print] PubMed PMID:32239747</p>                                                                                                                               | <p>No appropriate population sample</p> |
| <p>32: Lovato A, Rossettini G, de Filippis C. Sore throat in COVID-19: comment on Clinical characteristics of hospitalized patients with SARS-CoV-2 infection: A single arm meta-analysis. <i>J Med Virol.</i> 2020 Apr 1. doi: 10.1002/jmv.25815. [Epub ahead of print] PubMed PMID: 32239511.</p>                                                                                                                                                              | <p>No appropriate population sample</p> |
| <p>33: Agostini A, Floridi C, Borgheresi A, Badaloni M, Esposito Pirani P, Terilli F, Ottaviani L, Giovagnoni A. Proposal of a low-dose, long-pitch, dual-source chest CT protocol on third-generation dual-source CT using a tin filter for spectral shaping at 100 kVp for Coronavirus Disease 2019 (COVID-19) patients: a feasibility study. <i>Radiol Med.</i> 2020 Apr 1. doi: 10.1007/s11547-020-01179-x. [Epub ahead of print] PubMed PMID: 32239472.</p> | <p>No appropriate population sample</p> |
| <p>34: Chen Z, He S, Li F, Yin J, Chen X. Mobile field hospitals, an effective way of dealing with COVID-19 in China: sharing our experience. <i>Biosci Trends.</i> 2020 Apr 1. doi: 10.5582/bst.2020.01110. [Epub ahead of print] PubMed PMID: 32238673.</p>                                                                                                                                                                                                    | <p>No appropriate outcome</p>           |
| <p>35: Chawla D, Chirla D, Dalwai S, Deorari AK, Ganatra A, Gandhi A, Kabra NS, Kumar P, Mittal P, Parekh BJ, Sankar MJ, Singhal T, Sivanandan S, Tank P; Federation Of Obstetric And Gynecological Societies Of India (FOGSI), National Neonatology Forum Of India (NNF), And Indian Academy Of</p>                                                                                                                                                             | <p>No original article</p>              |

|                                                                                                                                                                                                                                                                                                                                                                                                                                        |                                  |
|----------------------------------------------------------------------------------------------------------------------------------------------------------------------------------------------------------------------------------------------------------------------------------------------------------------------------------------------------------------------------------------------------------------------------------------|----------------------------------|
| <p>Pediatrics (IAP).Perinatal-Neonatal Management of COVID-19 Infection - Guidelines of theFederation of Obstetric and Gynecological Societies of India (FOGSI), NationalNeonatology Forum of India (NNF), and Indian Academy of Pediatrics (IAP). Indian Pediatr. 2020 Apr 1. pii: S097475591600154. [Epub ahead of print] PubMed PMID:32238615</p>                                                                                   |                                  |
| <p>36: Shanker V. Measles Immunization: Worth Considering Containment Strategy forSARS-CoV-2 Global Outbreak. Indian Pediatr. 2020 Mar 29. pii: S097475591600153.[Epub ahead of print] PubMed PMID: 32238614.</p>                                                                                                                                                                                                                      | No appropriate outcome           |
| <p>37: Sundaram M, Ravikumar N, Bansal A, Nallasamy K, Basavaraja GV, Lodha R, GuptaD, Odena MP, Ashwath RNR, Jayashree M; For Intensive Care Chapter Of IndianAcademy Of Pediatrics. Novel Coronavirus 2019 (2019-nCoV) Infection: Part II -Respiratory Support in the Pediatric Intensive Care Unit in Resource-limitedSettings. Indian Pediatr. 2020 Mar 29. pii: S097475591600152. [Epub ahead ofprint] PubMed PMID: 32238613.</p> | No appropriate population sample |
| <p>38: Ravikumar N, Nallasamy K, Bansal A, Angurana SK, Basavaraja GV, Sundaram M,Lodha R, Gupta D, Jayashree M; For Intensive Care Chapter Of Indian Academy OfPediatrics. Novel Coronavirus 2019 (2019-nCoV) Infection: Part I - Preparednessand Management in the Pediatric Intensive Care Unit in Resource-limited Settings.Indian Pediatr. 2020 Mar 29. pii: S097475591600151. [Epub ahead of print] PubMed PMID: 32238612.</p>   | No appropriate population sample |
| <p>39: Karimi-Zarchi M, Neamatzadeh H, Dastgheib SA, Abbasi H, Mirjalili SR,Behforouz A, Ferdosian F, Bahrami R. Vertical Transmission of Coronavirus Disease19 (COVID-19) from Infected Pregnant Mothers to Neonates: A Review. Fetal PediatrPathol. 2020 Apr 2:1-5. doi: 10.1080/15513815.2020.1747120. [Epub ahead of print]PubMed PMID: 32238084.</p>                                                                              | No original article              |

|                                                                                                                                                                                                                                                                                                                                                                                                                                                                                            |                                         |
|--------------------------------------------------------------------------------------------------------------------------------------------------------------------------------------------------------------------------------------------------------------------------------------------------------------------------------------------------------------------------------------------------------------------------------------------------------------------------------------------|-----------------------------------------|
| <p>40: Broxmeyer HE, Parker GC. Impact of COVID-19 and Future Emerging Viruses on Hematopoietic Cell Transplantation and Other Cellular Therapies. <i>Stem Cells Dev.</i> 2020 Apr 3. doi: 10.1089/scd.2020.0064. [Epub ahead of print] PubMed PMID:32237972</p>                                                                                                                                                                                                                           | <p>No appropriate outcome</p>           |
| <p>41: Saghazadeh A, Rezaei N. Immune-epidemiological parameters of the novel coronavirus - a perspective. <i>Expert Rev Clin Immunol.</i> 2020 Apr 1. doi:10.1080/1744666X.2020.1750954. [Epub ahead of print] PubMed PMID: 32237901.</p>                                                                                                                                                                                                                                                 | <p>No original article</p>              |
| <p>42: Ye Q, Wang B, Mao J, Fu J, Shang S, Shu Q, Zhang T. Epidemiological analysis of COVID-19 and practical experience from China. <i>J Med Virol.</i> 2020 Apr 1. doi:10.1002/jmv.25813. [Epub ahead of print] Review. PubMed PMID: 32237160.</p>                                                                                                                                                                                                                                       | <p>No original article</p>              |
| <p>43: Yung CF, Kam KQ, Wong MSY, Maiwald M, Tan YK, Tan BH, Thoon KC. Environment and Personal Protective Equipment Tests for SARS-CoV-2 in the Isolation Room of an Infant With Infection. <i>Ann Intern Med.</i> 2020 Apr 1. doi: 10.7326/M20-0942. [Epub ahead of print] PubMed PMID: 32236490.</p>                                                                                                                                                                                    | <p>No appropriate population sample</p> |
| <p>44: Lazzeri M, Lanza A, Bellini R, Bellofiore A, Cecchetto S, Colombo A, D'Abrosca F, Del Monaco C, Gaudiello G, Paneroni M, Privitera E, Retucci M, Rossi V, Santambrogio M, Sommariva M, Frigerio P. Respiratory physiotherapy in patients with COVID-19 infection in acute setting: a Position Paper of the Italian Association of Respiratory Physiotherapists (ARIR). <i>Monaldi Arch Chest Dis.</i> 2020 Mar 26;90(1). doi: 10.4081/monaldi.2020.1285. PubMed PMID: 32236089.</p> | <p>No appropriate population sample</p> |
| <p>45: Turner D, Huang Y, Martín-de-Carpi J, Aloï M, Focht G, Kang B, Zhou Y, Sanchez C, Kappelman MD, Uhlig HH, Pujol-Muncunill G, Ledder O, Lionetti P, Dias JA, Ruemmele FM, Russell RK; Paediatric IBD Porto group of ESPGHAN. COVID-19 and Paediatric Inflammatory Bowel Diseases: Global</p>                                                                                                                                                                                         | <p>No appropriate population sample</p> |

|                                                                                                                                                                                                                                                                                                                                                                                                                               |                                  |
|-------------------------------------------------------------------------------------------------------------------------------------------------------------------------------------------------------------------------------------------------------------------------------------------------------------------------------------------------------------------------------------------------------------------------------|----------------------------------|
| <p>Experience and Provisional Guidance (March 2020) from the Paediatric IBD Porto group of ESPGHAN. <i>J Pediatr Gastroenterol Nutr.</i> 2020 Mar 31. doi: 10.1097/MPG.0000000000002729. [Epub ahead of print] PubMed PMID: 32235161.</p>                                                                                                                                                                                     |                                  |
| <p>46: Tian H, Liu Y, Li Y, Wu CH, Chen B, Kraemer MUG, Li B, Cai J, Xu B, Yang Q, Wang B, Yang P, Cui Y, Song Y, Zheng P, Wang Q, Bjornstad ON, Yang R, Grenfell BT, Pybus OG, Dye C. An investigation of transmission control measures during the first 50 days of the COVID-19 epidemic in China. <i>Science.</i> 2020 Mar 31. pii:eabb6105. doi: 10.1126/science.abb6105. [Epub ahead of print] PubMed PMID: 32234804</p> | No appropriate outcome           |
| <p>47: Hagmann SHF. COVID-19 in children: More than meets the eye. <i>Travel Med Infect Dis.</i> 2020 Mar 28:101649. doi: 10.1016/j.tmaid.2020.101649. [Epub ahead of print] PubMed PMID: 32234457.</p>                                                                                                                                                                                                                       | No appropriate population sample |
| <p>49: Feng K, Yun YX, Wang XF, Yang GD, Zheng YJ, Lin CM, Wang LF. [Analysis of CT features of 15 children with 2019 novel coronavirus infection]. <i>Zhonghua Er Ke Za Zhi.</i> 2020 Apr 2;58(4):275-278. doi: 10.3760/cma.j.cn112140-20200210-00071. Chinese. PubMed PMID: 32234131.</p>                                                                                                                                   | No appropriate population sample |
| <p>50: Mark K, Steel K, Stevenson J, Evans C, McCormick D, Willocks L, McCallum A, Jones L, Johannessen I, Templeton K, Koch O, Mackintosh C. Coronavirus disease (COVID-19) Community Testing Team in Scotland: A 14-day review, 6 to 20 February 2020. <i>Euro Surveill.</i> 2020 Mar;25(12). doi:10.2807/1560-7917.ES.2020.25.12.2000217. PubMed PMID: 32234116.</p>                                                       | No appropriate outcome           |
| <p>51: Hartley DM, Reisinger HS, Perencevich EN. When infection prevention enters the temple: Intergenerational social distancing and COVID-19. <i>Infect Control Hosp Epidemiol.</i> 2020 Apr 1:1-3. doi: 10.1017/ice.2020.100. [Epub ahead of print] PubMed PMID: 32234091.</p>                                                                                                                                             | No appropriate population sample |

|                                                                                                                                                                                                                                                                                                                                                                                     |                                         |
|-------------------------------------------------------------------------------------------------------------------------------------------------------------------------------------------------------------------------------------------------------------------------------------------------------------------------------------------------------------------------------------|-----------------------------------------|
| <p>52: Polites SF, Azarow KS. Perspectives on Pediatric Appendicitis and Appendectomy During the Severe Acute Respiratory Syndrome Coronavirus 2 Pandemic. <i>J Laparoendosc Adv Surg Tech A</i>. 2020 Apr 1. doi: 10.1089/lap.2020.0197. [Epub ahead of print] PubMed PMID: 32233967.</p>                                                                                          | <p>No appropriate population sample</p> |
| <p>53: Kamali Aghdam M, Jafari N, Eftekhari K. Novel coronavirus in a 15-day-old neonate with clinical signs of sepsis, a case report. <i>Infect Dis (Lond)</i>. 2020 Apr 1:1-3. doi: 10.1080/23744235.2020.1747634. [Epub ahead of print] PubMed PMID: 32233816</p>                                                                                                                | <p>Included</p>                         |
| <p>54: Korean Society of Infectious Diseases and Korea Centers for Disease Control and Prevention. Analysis on 54 Mortality Cases of Coronavirus Disease 2019 in the Republic of Korea from January 19 to March 10, 2020. <i>J Korean Med Sci</i>. 2020 Mar 30;35(12):e132. doi: 10.3346/jkms.2020.35.e132. PubMed PMID: 32233161.</p>                                              | <p>No appropriate population sample</p> |
| <p>55: Gandolfini I, Delsante M, Fiaccadori E, Zaza G, Manenti L, Degli Antoni A, Peruzzi L, Riella LV, Cravedi P, Maggiore U. COVID-19 in Kidney Transplant Recipients. <i>Am J Transplant</i>. 2020 Mar 31. doi: 10.1111/ajt.15891. [Epub ahead of print] PubMed PMID: 32233067.</p>                                                                                              | <p>No appropriate population sample</p> |
| <p>56: Abu-Rustum RS, Akolekar R, Sotiriadis A, Salomon LJ, Da Silva Costa F, Wu Q, Frusca T, Bilardo CM, Prefumo F, Poon LC. ISUOG Consensus Statement on organization of routine and specialist obstetric ultrasound services in the context of COVID-19. <i>Ultrasound Obstet Gynecol</i>. 2020 Mar 31. doi: 10.1002/uog.22029. [Epub ahead of print] PubMed PMID: 32233049.</p> | <p>No original article</p>              |
| <p>57: Bousquet J, Akdis C, Jutel M, Bachert C, Klimek L, Agache I, Ansotegui IJ, Bedbrook A, Bosnic-Anticevich S, Canonica GW, Chivato T, Cruz AA, Czarlewski W, Del Giacco S, Du H, Fonseca JA, Gao Y, Haahtela T, Hoffmann-Sommergruber K, Ivancevich JC, Khaltaev N, Knol EF, Kuna P, Larenas-Linnemann D, Mullol J, Naclerio R, Ohta K, Okamoto Y,</p>                         | <p>No appropriate population sample</p> |

|                                                                                                                                                                                                                                                                                                                                                                                                |                                  |
|------------------------------------------------------------------------------------------------------------------------------------------------------------------------------------------------------------------------------------------------------------------------------------------------------------------------------------------------------------------------------------------------|----------------------------------|
| <p>O'Mahony L, Onorato GL, Papadopoulos NG, Pfaar O, Samolinski B, Schwarze J, Toppila-Salmi S, Teresa Ventura M, Valiulis A, Yorgancioglu A, Zuberbier T; ARIA-MASK study group. Intranasal corticosteroids in allergic rhinitis in COVID-19 infected patients: An ARIA-EAACI statement. <i>Allergy</i>. 2020 Mar 31. doi: 10.1111/all.14302. [Epub ahead of print] PubMed PMID: 32233040</p> |                                  |
| <p>58: Jiatong S, Lanqin L, Wenjun L. COVID-19 epidemic: disease characteristics in children. <i>J Med Virol</i>. 2020 Mar 31. doi: 10.1002/jmv.25807. [Epub ahead of print] Review. PubMed PMID: 32232980.</p>                                                                                                                                                                                | No original article              |
| <p>59: Giovagnoni A. Facing the COVID-19 emergency: we can and we do. <i>Radiol Med</i>. 2020 Mar 30. doi: 10.1007/s11547-020-01178-y. [Epub ahead of print] PubMed PMID: 32232651</p>                                                                                                                                                                                                         | No appropriate outcome           |
| <p>60: Panahi L, Amiri M, Pouy S. Risks of Novel Coronavirus Disease (COVID-19) in Pregnancy; a Narrative Review. <i>Arch Acad Emerg Med</i>. 2020 Mar 23;8(1):e34.eCollection 2020. Review. PubMed PMID: 32232217; PubMed Central PMCID: PMC7092922.</p>                                                                                                                                      | No original article              |
| <p>61: Lee DH, Lee J, Kim E, Woo K, Park HY, An J. Emergency cesarean section on severe acute respiratory syndrome coronavirus 2 (SARS-CoV-2) confirmed patient. <i>Korean J Anesthesiol</i>. 2020 Mar 31. doi: 10.4097/kja.20116. [Epub ahead of print] PubMed PMID: 32229802.</p>                                                                                                            | Included                         |
| <p>62: Cao W, Fang Z, Hou G, Han M, Xu X, Dong J, Zheng J. The psychological impact of the COVID-19 epidemic on college students in China. <i>Psychiatry Res</i>. 2020 Mar 20;287:112934. doi: 10.1016/j.psychres.2020.112934. [Epub ahead of print] PubMed PMID: 32229390; PubMed Central PMCID: PMC7102633.</p>                                                                              | No appropriate population sample |
| <p>63: Rahimi F, Talebi Bezmin Abadi A. Practical Strategies Against the Novel Coronavirus and COVID-19-the Imminent Global Threat. <i>Arch Med Res</i>. 2020 Mar 27. pii: S0188-4409(20)30287-3. doi:</p>                                                                                                                                                                                     | No appropriate outcome           |



|                                                                                                                                                                                                                                                                                                                                                                                                     |                                  |
|-----------------------------------------------------------------------------------------------------------------------------------------------------------------------------------------------------------------------------------------------------------------------------------------------------------------------------------------------------------------------------------------------------|----------------------------------|
| 10.1016/j.arcmed.2020.03.005. [Epub ahead of print] PubMed PMID: 32229157.                                                                                                                                                                                                                                                                                                                          |                                  |
| 64: South AM, Diz D, Chappell MC. COVID-19, ACE2 and the CardiovascularConsequences. Am J Physiol Heart Circ Physiol. 2020 Mar 31. doi:10.1152/ajpheart.00217.2020. [Epub ahead of print] PubMed PMID: 32228252.                                                                                                                                                                                    | No appropriate outcome           |
| 65: Dunn CG, Kenney E, Fleischhacker SE, Bleich SN. Feeding Low-Income Childrenduring the Covid-19 Pandemic. N EngJ Med. 2020 Mar 30. doi:10.1056/NEJMp2005638. [Epub ahead of print] PubMed PMID: 32227759.                                                                                                                                                                                        | No appropriate outcome           |
| 66: Rundle AG, Park Y, Herbstman JB, Kinsey EW, Wang YC. COVID-19 Related School Closings and Risk of Weight Gain Among Children. Obesity (Silver Spring). 2020Mar 30. doi: 10.1002/oby.22813. [Epub ahead of print] PubMed PMID: 32227671.                                                                                                                                                         | No appropriate outcome           |
| 67: Szperka CL, Ailani J, Barmherzig R, Klein BC, Minen MT, Halker Singh RB,Shapiro RE. Migraine Care in the Era of COVID-19: Clinical Pearls and Plea toInsurers. Headache. 2020 Mar 30. doi: 10.1111/head.13810. [Epub ahead of print]PubMed PMID: 32227596.                                                                                                                                      | No appropriate population sample |
| 68: Soldati G, Smargiassi A, Inchingolo R, Buonsenso D, Perrone T, Briganti DF,Perlini S, Torri E, Mariani A, Mossolani EE, Tursi F, Mento F, Demi L. Proposalfor international standardization of the use of lung ultrasound for COVID-19patients; a simple, quantitative, reproducible method. J Ultrasound Med. 2020 Mar30. doi: 10.1002/jum.15285. [Epub ahead of print] PubMed PMID: 32227492. | No original article              |
| 69: Cassaniti I, Novazzi F, Giardina F, Salivaro F, Sachs M, Perlini S, Bruno R, Mojoli F, Baldanti F; San Matteo Pavia COVID-19 Task Force. Performance of VivaDiagTM COVID-19 IgM/IgG Rapid Test is inadequate                                                                                                                                                                                    | No appropriate population sample |

|                                                                                                                                                                                                                                                                                                                                                                                                                                                                                                                     |                                  |
|---------------------------------------------------------------------------------------------------------------------------------------------------------------------------------------------------------------------------------------------------------------------------------------------------------------------------------------------------------------------------------------------------------------------------------------------------------------------------------------------------------------------|----------------------------------|
| <p>for diagnosis of COVID-19 in acute patients referring to emergency room department. <i>J Med Virol.</i> 2020 Mar 30. doi: 10.1002/jmv.25800. [Epub ahead of print] PubMed PMID: 32227490.</p>                                                                                                                                                                                                                                                                                                                    |                                  |
| <p>70: Schiariti V. The human rights of children with disabilities during health emergencies: the challenge of COVID-19. <i>Dev Med Child Neurol.</i> 2020 Mar 30. doi:10.1111/dmcn.14526. [Epub ahead of print] PubMed PMID: 32227474.</p>                                                                                                                                                                                                                                                                         | No appropriate population sample |
| <p>71: Zhu H, Wei L, Niu P. The novel coronavirus outbreak in Wuhan, China. <i>Glob Health Res Policy.</i> 2020 Mar 2;5:6. doi: 10.1186/s41256-020-00135-6. eCollection2020. PubMed PMID: 32226823; PubMed Central PMCID: PMC7050114.</p>                                                                                                                                                                                                                                                                           | No appropriate outcome           |
| <p>72: Sifuentes-Rodríguez E, Palacios-Reyes D. COVID-19: The outbreak caused by a new coronavirus. <i>Bol Med Hosp Infant Mex.</i> 2020;77(2):47-53. doi:10.24875/BMHIM.20000039. Review. PubMed PMID: 32226003.</p>                                                                                                                                                                                                                                                                                               | No appropriate outcome           |
| <p>73: Simonato A, Giannarini G, Abrate A, Bartoletti R, Crestani A, De Nunzio C, Gregori A, Liguori G, Novara G, Pavan N, Trombetta C, Tubaro A, Porpiglia F, Ficarra V; Members of the Research Urology Network (RUN). Pathways for urology patients during the COVID-19 pandemic. <i>Minerva Urol Nefrol.</i> 2020 Mar 30. doi:10.23736/S0393-2249.20.03861-8. [Epub ahead of print] PubMed PMID: 32225135.</p>                                                                                                  | No appropriate population sample |
| <p>74: Alhazzani W, Møller MH, Arabi YM, Loeb M, Gong MN, Fan E, Oczkowski S, Levy MM, Derde L, Dzierba A, Du B, Aboodi M, Wunsch H, Cecconi M, Koh Y, Chertow DS, Maitland K, Alshamsi F, Belley-Cote E, Greco M, Laundry M, Morgan JS, Kesecioglu J, McGeer A, Mermel L, Mammen MJ, Alexander PE, Arrington A, Centofanti JE, Citerio G, Baw B, Memish ZA, Hammond N, Hayden FG, Evans L, Rhodes A. Surviving Sepsis Campaign: Guidelines on the Management of Critically Ill Adults with Coronavirus Disease</p> | No appropriate population sample |

|                                                                                                                                                                                                                                                                                                                                                                                                             |                        |
|-------------------------------------------------------------------------------------------------------------------------------------------------------------------------------------------------------------------------------------------------------------------------------------------------------------------------------------------------------------------------------------------------------------|------------------------|
| <p>2019 (COVID-19). Crit Care Med. 2020 Mar 27. doi:10.1097/CCM.0000000000004363. [Epub ahead of print] PubMed PMID: 32224769.</p>                                                                                                                                                                                                                                                                          |                        |
| <p>75: Paintsil E. COVID-19 threatens health systems in sub-Saharan Africa: the eye of the crocodile. J Clin Invest. 2020 Mar 30. pii: 138493. doi:10.1172/JCI138493. [Epub ahead of print] PubMed PMID: 32224550.</p>                                                                                                                                                                                      | No appropriate outcome |
| <p>76: Rajgor DD, Lee MH, Archuleta S, Bagdasarian N, Quek SC. The many estimates of the COVID-19 case fatality rate. Lancet Infect Dis. 2020 Mar 27. pii:S1473-3099(20)30244-9. doi: 10.1016/S1473-3099(20)30244-9. [Epub ahead of print] PubMed PMID: 32224313.</p>                                                                                                                                       | No appropriate outcome |
| <p>77: Sinha IP, Harwood R, Semple MG, Hawcutt DB, Thursfield R, Narayan O, Kenny SE, Viner R, Hewer SL, Southern KW. COVID-19 infection in children. Lancet Respir Med. 2020 Mar 27. pii: S2213-2600(20)30152-1. doi: 10.1016/S2213-2600(20)30152-1. [Epub ahead of print] PubMed PMID: 32224304.</p>                                                                                                      | No original article    |
| <p>78: Liu JJ, Bao Y, Huang X, Shi J, Lu L. Mental health considerations for children quarantined because of COVID-19. Lancet Child Adolesc Health. 2020 Mar 27. pii: S2352-4642(20)30096-1. doi: 10.1016/S2352-4642(20)30096-1. [Epub ahead of print] PubMed PMID: 32224303.</p>                                                                                                                           | No appropriate outcome |
| <p>79: Shaker MS, Oppenheimer J, Grayson M, Stukus D, Hartog N, Hsieh EWY, Rider N, Dutmer CM, Vander Leek TK, Kim H, Chan ES, Mack D, Ellis AK, Lang D, Lieberman J, Fleischer D, Golden DBK, Wallace D, Portnoy J, Mosnaim G, Greenhawt M. COVID-19: Pandemic Contingency Planning for the Allergy and Immunology Clinic. J Allergy Clin Immunol Pract. 2020 Mar 26. pii: S2213-2198(20)30253-1. doi:</p> | No appropriate outcome |

|                                                                                                                                                                                                                                                                                                                                                                               |                                         |
|-------------------------------------------------------------------------------------------------------------------------------------------------------------------------------------------------------------------------------------------------------------------------------------------------------------------------------------------------------------------------------|-----------------------------------------|
| <p>80: Huang YC, Lee PI, Hsueh PR. Evolving reporting criteria of COVID-19 in Taiwan during the epidemic. <i>J Microbiol Immunol Infect.</i> 2020 Mar 19. pii:S1684-1182(20)30074-8. doi: 10.1016/j.jmii.2020.03.014. [Epub ahead of print] PubMed PMID: 32224117.</p>                                                                                                        | <p>No appropriate outcome</p>           |
| <p>81: Ma X, Su L, Zhang Y, Zhang X, Gai Z, Zhang Z. Do children need a longer time to shed SARS-CoV-2 in stool than adults? <i>J Microbiol Immunol Infect.</i> 2020 Mar 19. pii: S1684-1182(20)30070-0. doi: 10.1016/j.jmii.2020.03.010. [Epub ahead of print] PubMed PMID: 32224116.</p>                                                                                    | <p>No appropriate population sample</p> |
| <p>82: COVID-19 National Incident Room Surveillance Team. COVID-19, Australia: Epidemiology Report 8 (Reporting period from 19:00 AEDT 14 March to 23:59 AEDT 22 March 2020). <i>Commun Dis Intell</i> (2018). 2020 Mar 27;44. doi:10.33321/cdi.2020.44.28. PubMed PMID: 32223725.</p>                                                                                        | <p>No appropriate outcome</p>           |
| <p>83: Marinelli KA. International Perspectives Concerning Donor Milk Banking During the SARS-CoV-2 (COVID-19) Pandemic. <i>J Hum Lact.</i> 2020 Mar 30;890334420917661. doi:10.1177/0890334420917661. [Epub ahead of print] PubMed PMID: 32223581.</p>                                                                                                                       | <p>No appropriate outcome</p>           |
| <p>84: Capanna F, Haydar A, McCarey C, Bernini Carri E, Bartha Rasero J, Tsibizova V, Helmer H, Makatsarya A, Di Renzo GC. Preparing an obstetric unit in the heart of the epidemic strike of COVID-19: quick reorganization tips. <i>J Matern Fetal Neonatal Med.</i> 2020 Mar 29;1-11. doi: 10.1080/14767058.2020.1749258. [Epub ahead of print] PubMed PMID: 32223490.</p> | <p>No original article</p>              |
| <p>85: Mirzadeh M, Khedmat L. Pregnant Women in the Exposure to COVID-19 Infection Outbreak: The Unseen Risk Factors and Preventive Healthcare Patterns. <i>J Matern Fetal Neonatal Med.</i> 2020 Mar 29;1-4. doi: 10.1080/14767058.2020.1749257. [Epub ahead of print] PubMed PMID: 32223477.</p>                                                                            | <p>No original article</p>              |

|                                                                                                                                                                                                                                                                                                                                                                                                                                                                                                                                                                                                                                                                                                        |                                         |
|--------------------------------------------------------------------------------------------------------------------------------------------------------------------------------------------------------------------------------------------------------------------------------------------------------------------------------------------------------------------------------------------------------------------------------------------------------------------------------------------------------------------------------------------------------------------------------------------------------------------------------------------------------------------------------------------------------|-----------------------------------------|
| <p>86: Wollenberg A, Flohr C, Simon D, Cork MJ, Thyssen JP, Bieber T, deBruin-Weller MS, Weidinger S, Deleuran M, Taieb A, Paul C, Trzeciak M, Werfel T, Seneschal J, Barbarot S, Darsow U, Torrelo A, Stalder JF, Svensson Å, Hijnen D, Gelmetti C, Szalai Z, Gieler U, De Raeve L, Kunz B, Spuls P, von Kobyletzki LB, Fölster-Holst R, Chernyshov PV, Cristen-Zaech S, Heratizadeh A, Ring J, Vestergaard C. European Task Force on Atopic Dermatitis (ETFAD) statement on severe acute respiratory syndrome coronavirus 2 (SARS-Cov-2)-infection and atopic dermatitis. <i>J Eur Acad Dermatol Venereol</i>. 2020 Mar 29. doi: 10.1111/jdv.16411. [Epub ahead of print] PubMed PMID: 32223003.</p> | <p>No appropriate population sample</p> |
| <p>87: Zehender G, Lai A, Bergna A, Meroni L, Riva A, Balotta C, Tarkowski M, Gabrieli A, Bernacchia D, Rusconi S, Rizzardini G, Antinori S, Galli M. GENOMIC CHARACTERISATION AND PHYLOGENETIC ANALYSIS OF SARS-COV-2 IN ITALY. <i>J Med Virol</i>. 2020 Mar 29. doi: 10.1002/jmv.25794. [Epub ahead of print] PubMed PMID: 32222993.</p>                                                                                                                                                                                                                                                                                                                                                             | <p>No appropriate outcome</p>           |
| <p>88: Zhang T, Cui X, Zhao X, Wang J, Zheng J, Zheng G, Guo W, Cai C, He S, Xu Y. Detectable SARS-CoV-2 Viral RNA in Feces of Three Children during Recovery Period of COVID-19 Pneumonia. <i>J Med Virol</i>. 2020 Mar 29. doi: 10.1002/jmv.25795. [Epub ahead of print] PubMed PMID: 32222992.</p>                                                                                                                                                                                                                                                                                                                                                                                                  | <p>No appropriate population sample</p> |
| <p>89: Tian Y, Rong L, Nian W, He Y. Review article: gastrointestinal features in COVID-19 and the possibility of faecal transmission. <i>Aliment Pharmacol Ther</i>. 2020 Mar 29. doi: 10.1111/apt.15731. [Epub ahead of print] Review. PubMed PMID: 32222988</p>                                                                                                                                                                                                                                                                                                                                                                                                                                     | <p>No original article</p>              |
| <p>90: Henry BM, Lippi G. Chronic kidney disease is associated with severe coronavirus disease 2019 (COVID-19) infection. <i>Int Urol Nephrol</i>. 2020 Mar 28. doi: 10.1007/s11255-020-02451-9. [Epub ahead of print] PubMed PMID: 32222883.</p>                                                                                                                                                                                                                                                                                                                                                                                                                                                      | <p>No appropriate population sample</p> |

|                                                                                                                                                                                                                                                                                                                                                                                                                   |                                  |
|-------------------------------------------------------------------------------------------------------------------------------------------------------------------------------------------------------------------------------------------------------------------------------------------------------------------------------------------------------------------------------------------------------------------|----------------------------------|
| <p>92: Zambrano LI, Fuentes-Barahona IC, Bejarano-Torres DA, Bustillo C, Gonzales G, Vallecillo-Chinchilla G, Sanchez-Martínez FE, Valle-Reconco JA, Sierra M, Bonilla-Aldana DK, Cardona-Ospina JA, Rodríguez-Morales AJ. A pregnant woman with COVID-19 in Central America. <i>Travel Med Infect Dis.</i> 2020 Mar 25:101639. doi:10.1016/j.tmaid.2020.101639. [Epub ahead of print] PubMed PMID: 32222420.</p> | Included                         |
| <p>93: La Marca A, Niederberger C, Pellicer A, Nelson SM. COVID-19: lessons from the Italian reproductive medical experience. <i>Fertil Steril.</i> 2020 Mar 25. pii:S0015-0282(20)30297-1. doi: 10.1016/j.fertnstert.2020.03.021. [Epub ahead of print] PubMed PMID: 32222253.</p>                                                                                                                               | No appropriate population sample |
| <p>94: Li Y, Hu Y, Zhang X, Yu Y, Li B, Wu J, Wu Y, Xia X, Xu J. [Follow-up testing of viral nucleic acid in discharged patients with moderate type of 2019 coronavirus disease (COVID-19)]. <i>Zhejiang Da Xue Xue Bao Yi Xue Ban.</i> 2020 May 25;49(1):0. Chinese. PubMed PMID: 32222122.</p>                                                                                                                  | No appropriate population sample |
| <p>95: Chen S, Liao E, Shao Y. Clinical analysis of pregnant women with 2019 novel coronavirus pneumonia. <i>J Med Virol.</i> 2020 Mar 28. doi: 10.1002/jmv.25789. [Epub ahead of print] PubMed PMID: 32222119.</p>                                                                                                                                                                                               | Overlapping data                 |
| <p>96: Abdelmaksoud A, Kroumpouzou G, Jafferany M, Lotti T, Sadoughifar R, Goldust M. COVID-19 in the Pediatric Population. <i>Dermatol Ther.</i> 2020 Mar 27:e13339. doi: 10.1111/dth.13339. [Epub ahead of print] PubMed PMID: 32222027.</p>                                                                                                                                                                    | No original article              |
| <p>97: Yang C. Does hand hygiene reduce SARS-CoV-2 transmission? <i>Graefes Arch Clin Exp Ophthalmol.</i> 2020 Mar 27. doi: 10.1007/s00417-020-04652-5. [Epub ahead of print] PubMed PMID: 32221693.</p>                                                                                                                                                                                                          | No appropriate outcome           |

|                                                                                                                                                                                                                                                                                                                                                                                      |                                  |
|--------------------------------------------------------------------------------------------------------------------------------------------------------------------------------------------------------------------------------------------------------------------------------------------------------------------------------------------------------------------------------------|----------------------------------|
| <p>98: Wurcel AG, Dauria E, Zaller N, Nijhawan A, Beckwith C, Nowotny K, Brinkley-Rubinstein L. Spotlight on Jails: COVID-19 Mitigation Policies Needed Now. <i>Clin Infect Dis.</i> 2020 Mar 28. pii: ciaa346. doi: 10.1093/cid/ciaa346. [Epub ahead of print] PubMed PMID: 32221515.</p>                                                                                           | No appropriate outcome           |
| <p>99: Chidini G, Villa C, Calderini E, Marchisio P, De Luca D. SARS-CoV-2 Infection in a Pediatric Department in Milan: A Logistic Rather Than a Clinical Emergency. <i>Pediatr Infect Dis J.</i> 2020 Mar 25. doi: 10.1097/INF.0000000000002687. [Epub ahead of print] PubMed PMID: 32221165.</p>                                                                                  | No appropriate population sample |
| <p>100: Ramirez PT, Chiva L, Eriksson AGZ, Frumovitz M, Fagotti A, Gonzalez Martin A, Jhingran A, Pareja R. COVID-19 Global Pandemic: Options for Management of Gynecologic Cancers. <i>Int J Gynecol Cancer.</i> 2020 Mar 27. pii: ijgc-2020-001419. doi: 10.1136/ijgc-2020-001419. [Epub ahead of print] PubMed PMID: 32221023.</p>                                                | No appropriate population sample |
| <p>101: Sparks MA, South A, Welling P, Luther JM, Cohen J, Byrd JB, Burrell LM, Battle D, Tomlinson L, Bhalla V, Rheault MN, Soler MJ, Swaminathan S, Hiremath S. Sound Science before Quick Judgement Regarding RAS Blockade in COVID-19. <i>Clin J Am Soc Nephrol.</i> 2020 Mar 27. pii: CJN.03530320. doi: 10.2215/CJN.03530320. [Epub ahead of print] PubMed PMID: 32220930.</p> | No appropriate outcome           |
| <p>102: Kotecha RS. Challenges posed by COVID-19 to children with cancer. <i>Lancet Oncol.</i> 2020 Mar 25. pii: S1470-2045(20)30205-9. doi: 10.1016/S1470-2045(20)30205-9. [Epub ahead of print] PubMed PMID: 32220660.</p>                                                                                                                                                         | No appropriate population sample |
| <p>103: Cluver L, Lachman JM, Sherr L, Wessels I, Krug E, Rakotomalala S, Blight S, Hillis S, Bachman G, Green O, Butchart A, Tomlinson M, Ward CL, Doubt J, McDonald K. Parenting in a time of COVID-19. <i>Lancet.</i> 2020 Mar 25. pii: S0140-6736(20)30736-4. doi: 10.1016/S0140-</p>                                                                                            | No original article              |

|                                                                                                                                                                                                                                                                                                                                                                                                                                                            |                                         |
|------------------------------------------------------------------------------------------------------------------------------------------------------------------------------------------------------------------------------------------------------------------------------------------------------------------------------------------------------------------------------------------------------------------------------------------------------------|-----------------------------------------|
| <p>6736(20)30736-4. [Epub ahead of print]<br/>PubMed PMID: 32220657.</p>                                                                                                                                                                                                                                                                                                                                                                                   |                                         |
| <p>104: Prem K, Liu Y, Russell TW, Kucharski AJ, Eggo RM, Davies N; Centre for theMathematical Modelling of Infectious Diseases COVID-19 Working Group, Jit M,Klepac P. The effect of control strategies to reduce social mixing on outcomes ofthe COVID-19 epidemic in Wuhan, China: a modelling study. Lancet Public Health.2020 Mar 25. pii: S2468-2667(20)30073-6. doi: 10.1016/S2468-2667(20)30073-6.[Epub ahead of print] PubMed PMID: 32220655.</p> | <p>No appropriate outcome</p>           |
| <p>105: Kelvin AA, Halperin S. COVID-19 in children: the link in the transmissionchain. Lancet Infect Dis. 2020 Mar 25. pii: S1473-3099(20)30236-X. doi:10.1016/S1473-3099(20)30236-X. [Epub ahead of print] PubMed PMID: 32220651.</p>                                                                                                                                                                                                                    | <p>No appropriate outcome</p>           |
| <p>106: Qiu H, Wu J, Hong L, Luo Y, Song Q, Chen D. Clinical and epidemiologicalfeatures of 36 children with coronavirus disease 2019 (COVID-19) in Zhejiang,China: an observational cohort study. Lancet Infect Dis. 2020 Mar 25. pii:S1473-3099(20)30198-5. doi: 10.1016/S1473-3099(20)30198-5. [Epub ahead of print] PubMed PMID: 32220650.</p>                                                                                                         | <p>No appropriate population sample</p> |
| <p>107: Portnoy J, Waller M, Elliott T. Telemedicine in the Era of COVID-19. JAllergy Clin Immunol Pract. 2020 Mar 24. pii: S2213-2198(20)30249-X. doi:10.1016/j.jaip.2020.03.008. [Epub ahead of print] PubMed PMID: 32220575; PubMedCentral PMCID: PMC7104202.</p>                                                                                                                                                                                       | <p>No appropriate outcome</p>           |
| <p>108: Hsih WH, Cheng MY, Ho MW, Chou CH, Lin PC, Chi CY, Liao WC, Chen CY, LeongLY, Tien N, Lai HC, Lai YC, Lu MC. Featuring COVID-19 cases via screeningsymptomatic patients with epidemiologic link during flu season in a medicalcenter of central Taiwan. J Microbiol Immunol Infect. 2020 Mar 13. pii:S1684-</p>                                                                                                                                    | <p>No appropriate population sample</p> |



|                                                                                                                                                                                                                                                                                                                                                                                                                               |                        |
|-------------------------------------------------------------------------------------------------------------------------------------------------------------------------------------------------------------------------------------------------------------------------------------------------------------------------------------------------------------------------------------------------------------------------------|------------------------|
| <p>1182(20)30068-2. doi: 10.1016/j.jmii.2020.03.008. [Epub ahead of print]PubMed PMID: 32220574; PubMed Central PMCID: PMC7102665.</p>                                                                                                                                                                                                                                                                                        |                        |
| <p>109: Majumder MS, Mandl KD. Early in the epidemic: impact of preprints on global discourse about COVID-19 transmissibility. Lancet Glob Health. 2020 Mar 24. pii: S2214-109X(20)30113-3. doi: 10.1016/S2214-109X(20)30113-3. [Epub ahead of print] PubMed PMID: 32220289.</p>                                                                                                                                              | No appropriate outcome |
| <p>110: Luo Y, Yin K. Management of pregnant women infected with COVID-19. Lancet Infect Dis. 2020 Mar 24. pii: S1473-3099(20)30191-2. doi:10.1016/S1473-3099(20)30191-2. [Epub ahead of print] PubMed PMID: 32220285.</p>                                                                                                                                                                                                    | No original article    |
| <p>111: Yu N, Li W, Kang Q, Xiong Z, Wang S, Lin X, Liu Y, Xiao J, Liu H, Deng D, Chen S, Zeng W, Feng L, Wu J. Clinical features and obstetric and neonatal outcomes of pregnant patients with COVID-19 in Wuhan, China: a retrospective, single-centre, descriptive study. Lancet Infect Dis. 2020 Mar 24. pii: S1473-3099(20)30176-6. doi: 10.1016/S1473-3099(20)30176-6. [Epub ahead of print] PubMed PMID: 32220284.</p> | Overlapping data       |
| <p>112: Henry BM, Vikse J. Clinical Characteristics of Covid-19 in China. N Engl J Med. 2020 Mar 27;382. pii: 10.1056/NEJMc2005203#sa4. doi: 10.1056/NEJMc2005203. [Epub ahead of print] PubMed PMID: 32220205.</p>                                                                                                                                                                                                           | No original article    |
| <p>113: Wang Y, Zhou CC, Shu R, Zou J. [Oral Health Management of Children during the Epidemic Period of Coronavirus Disease 2019]. Sichuan Da Xue Xue Bao Yi Xue Ban. 2020 Mar;51(2):151-154. doi: 10.12182/20200360101. Review. Chinese. PubMed PMID: 32220180.</p>                                                                                                                                                         | No appropriate outcome |

|                                                                                                                                                                                                                                                                                                                                                                                     |                                         |
|-------------------------------------------------------------------------------------------------------------------------------------------------------------------------------------------------------------------------------------------------------------------------------------------------------------------------------------------------------------------------------------|-----------------------------------------|
| <p>114: Qi H, Luo X, Zheng Y, Zhang H, Li J, Zou L, Feng L, Chen D, Shi Y, Tong C, Baker PN. Safe Delivery for COVID-19 Infected Pregnancies. BJOG. 2020 Mar 26. doi: 10.1111/1471-0528.16231. [Epub ahead of print] PubMed PMID: 32219995.</p>                                                                                                                                     | <p>No original article</p>              |
| <p>115: Chen Y, Li Z, Zhang YY, Zhao WH, Yu ZY. Maternal health care management during the outbreak of coronavirus disease 2019 (COVID-19). J Med Virol. 2020 Mar 26. doi: 10.1002/jmv.25787. [Epub ahead of print] Review. PubMed PMID: 32219871.</p>                                                                                                                              | <p>No useful data</p>                   |
| <p>116: Wang SS, Zhou X, Lin XG, Liu YY, Wu JL, Sharifu LM, Hu XL, Rong ZH, Liu W, Luo XP, Chen Z, Zeng WJ, Chen SH, Ma D, Chen L, Feng L. Experience of Clinical Management for Pregnant Women and Newborns with Novel Coronavirus Pneumonia in Tongji Hospital, China. Curr Med Sci. 2020 Mar 26. doi:10.1007/s11596-020-2174-4. [Epub ahead of print] PubMed PMID: 32219626.</p> | <p>No original article</p>              |
| <p>117: Michels G, Ochmann U, Cranen R. [Maternity protection-also during the coronacrisis]. Med Klin Intensivmed Notfmed. 2020 Mar 26. doi:10.1007/s00063-020-00677-0. [Epub ahead of print] Review. German. PubMed PMID:32219471; PubMed Central PMCID: PMC7100415.</p>                                                                                                           | <p>No appropriate population sample</p> |
| <p>118: Chen WH, Strych U, Hotez PJ, Bottazzi ME. The SARS-CoV-2 Vaccine Pipeline: an Overview. Curr Trop Med Rep. 2020 Mar 3:1-4. doi: 10.1007/s40475-020-00201-6. [Epub ahead of print] Review. PubMed PMID: 32219057; PubMed Central PMCID: PMC7094941.</p>                                                                                                                      | <p>No appropriate outcome</p>           |
| <p>119: Voithl P, Niehues T. [Coronavirus disease in children-initial data from Wuhan]. Monatsschr Kinderheilkd. 2020 Mar 24:1-2. doi:10.1007/s00112-020-00907-x. [Epub ahead of print] German. PubMed PMID: 32218613; PubMed Central PMCID: PMC7095346.</p>                                                                                                                        | <p>No original article</p>              |

|                                                                                                                                                                                                                                                                                                                                                                                                                |                                         |
|----------------------------------------------------------------------------------------------------------------------------------------------------------------------------------------------------------------------------------------------------------------------------------------------------------------------------------------------------------------------------------------------------------------|-----------------------------------------|
| <p>120: Liu M, Song Z, Xiao K. High-Resolution Computed Tomography Manifestations of Pediatric Patients With 2019 Novel Coronavirus. <i>J Comput Assist Tomogr.</i> 2020 Mar 25. doi: 10.1097/RCT.0000000000001023. [Epub ahead of print] PubMed PMID:32217900</p>                                                                                                                                             | <p>No appropriate population sample</p> |
| <p>121: Chen G, Wu D, Guo W, Cao Y, Huang D, Wang H, Wang T, Zhang X, Chen H, Yu H, Zhang X, Zhang M, Wu S, Song J, Chen T, Han M, Li S, Luo X, Zhao J, Ning Q. Clinical and immunologic features in severe and moderate Coronavirus Disease 2019. <i>J Clin Invest.</i> 2020 Mar 27. pii: 137244. doi: 10.1172/JCI137244. [Epub ahead of print] PubMed PMID: 32217835.</p>                                    | <p>No appropriate population sample</p> |
| <p>122: Chen T, Wu D, Chen H, Yan W, Yang D, Chen G, Ma K, Xu D, Yu H, Wang H, Wang T, Guo W, Chen J, Ding C, Zhang X, Huang J, Han M, Li S, Luo X, Zhao J, Ning Q. Clinical characteristics of 113 deceased patients with coronavirus disease 2019: retrospective study. <i>BMJ.</i> 2020 Mar 26;368:m1091. doi: 10.1136/bmj.m1091. Erratum in: <i>BMJ.</i> 2020 Mar 31;368:m1295. PubMed PMID: 32217556.</p> | <p>No appropriate population sample</p> |
| <p>123: Dashraath P, Jing Lin Jeslyn W, Mei Xian Karen L, Li Min L, Sarah L, Biswas A, Arjandas Choolani M, Mattar C, Lin SL. Coronavirus Disease 2019 (COVID-19) Pandemic and Pregnancy. <i>Am J Obstet Gynecol.</i> 2020 Mar 23. pii:S0002-9378(20)30343-4. doi: 10.1016/j.ajog.2020.03.021. [Epub ahead of print] PubMed PMID: 32217113.</p>                                                                | <p>No original article</p>              |
| <p>127: Atluri S, Manchikanti L, Hirsch JA. Expanded Umbilical Cord Mesenchymal Stem Cells (UC-MSCs) as a Therapeutic Strategy in Managing Critically Ill COVID-19 Patients: The Case for Compassionate Use. <i>Pain Physician.</i> 2020 Mar;23(2):E71-E83. PubMed PMID: 32214286.</p>                                                                                                                         | <p>No appropriate outcome</p>           |

|                                                                                                                                                                                                                                                                                                                                                                                                                   |                               |
|-------------------------------------------------------------------------------------------------------------------------------------------------------------------------------------------------------------------------------------------------------------------------------------------------------------------------------------------------------------------------------------------------------------------|-------------------------------|
| <p>128: CDC COVID-19 Response Team. Severe Outcomes Among Patients with Coronavirus Disease 2019 (COVID-19) - United States, February 12-March 16, 2020. MMWR MorbMortal Wkly Rep. 2020 Mar 27;69(12):343-346. doi: 10.15585/mmwr.mm6912e2. PubMed PMID: 32214079.</p>                                                                                                                                            | <p>No appropriate outcome</p> |
| <p>147: Poon LC, Abramowicz JS, Dall'Asta A, Sande R, Ter Haar G, Maršal K, BrezinkaC, Miloro P, Basseal J, Westerway SC, Abu-Rustum RS, Lees C. ISUOG SafetyCommittee Position Statement: safe performance of obstetric and gynecologicalscans and equipment cleaning in the context of COVID-19. Ultrasound ObstetGynecol. 2020 Mar 23. doi: 10.1002/uog.22027. [Epub ahead of print] PubMed PMID: 32207189</p> | <p>No original article</p>    |
| <p>1: Zeng L, Xia S, Yuan W, Yan K, Xiao F, Shao J, Zhou W. Neonatal Early-OnsetInfection With SARS-CoV-2 in 33 Neonates Born to Mothers With COVID-19 in Wuhan, China. JAMA Pediatr. 2020 Mar 26. doi: 10.1001/jamapediatrics.2020.0878. [Epubahead of print] PubMed PMID: 32215598.</p>                                                                                                                         | <p>Included</p>               |
| <p>2: Zeng H, Xu C, Fan J, Tang Y, Deng Q, Zhang W, Long X. Antibodies in Infants Born to Mothers With COVID-19 Pneumonia. JAMA. 2020 Mar 26. doi:10.1001/jama.2020.4861. [Epub ahead of print] PubMed PMID: 32215589.</p>                                                                                                                                                                                        | <p>Included</p>               |
| <p>3: Dong L, Tian J, He S, Zhu C, Wang J, Liu C, Yang J. Possible VerticalTransmission of SARS-CoV-2 From an Infected Mother to Her Newborn. JAMA. 2020 Mar26. doi: 10.1001/jama.2020.4621. [Epub ahead of print] PubMed PMID: 32215581.</p>                                                                                                                                                                     | <p>Included</p>               |
| <p>4: Rasmussen SA, Jamieson DJ. Coronavirus Disease 2019 (COVID-19) and Pregnancy: Responding to a Rapidly Evolving Situation. Obstet Gynecol. 2020 Mar 19. doi:10.1097/AOG.0000000000003873. [Epub ahead of print] PubMed PMID: 32213786.</p>                                                                                                                                                                   | <p>No original article</p>    |

|                                                                                                                                                                                                                                                                                                                                                                                                                                       |                                         |
|---------------------------------------------------------------------------------------------------------------------------------------------------------------------------------------------------------------------------------------------------------------------------------------------------------------------------------------------------------------------------------------------------------------------------------------|-----------------------------------------|
| <p>5: Kraemer MUG, Yang CH, Gutierrez B, Wu CH, Klein B, Pigott DM; Open COVID-19Data Working Group, du Plessis L, Faria NR, Li R, Hanage WP, Brownstein JS, LayanM, Vespignani A, Tian H, Dye C, Pybus OG, Scarpino SV. The effect of humanmobility and control measures on the COVID-19 epidemic in China. <i>Science</i>. 2020Mar 25. pii: eabb4218. doi: 10.1126/science.abb4218. [Epub ahead of print] PubMedPMID: 32213647.</p> | <p>No appropriate outcome</p>           |
| <p>6: Bhutta ZA, Basnyat B, Saha S, Laxminarayan R. Covid-19 risks and response inSouth Asia. <i>BMJ</i>. 2020 Mar 25;368:m1190. doi: 10.1136/bmj.m1190. PubMed PMID:32213488</p>                                                                                                                                                                                                                                                     | <p>No appropriate outcome</p>           |
| <p>7: Koo JR, Cook AR, Park M, Sun Y, Sun H, Lim JT, Tam C, Dickens BL.Interventions to mitigate early spread of SARS-CoV-2 in Singapore: a modellingstudy. <i>Lancet Infect Dis</i>. 2020 Mar 23. pii: S1473-3099(20)30162-6. doi:10.1016/S1473-3099(20)30162-6. [Epub ahead of print] PubMed PMID: 32213332.</p>                                                                                                                    | <p>No appropriate outcome</p>           |
| <p>8: Le HT, Nguyen LV, Tran DM, Do HT, Tran HT, Le YT, Phan PH. The first infantcase of COVID-19 acquired from a secondary transmission in Vietnam. <i>Lancet Child Adolesc Health</i>. 2020 Mar 23. pii: S2352-4642(20)30091-2. doi:10.1016/S2352-4642(20)30091-2. [Epub ahead of print] PubMed PMID: 32213326.</p>                                                                                                                 | <p>No appropriate population sample</p> |
| <p>9: Gan H, Zhang Y, Yuan M, Wu XY, Liu ZR, Liu M, Wu JB, Xu SJ, Gong L, Xu HL, TaoFB. [Epidemiological analysis on 1 052 cases of COVID-19 in epidemic clusters].<i>Zhonghua Liu Xing Bing Xue Za Zhi</i>. 2020 Mar 26;41(5):E027. doi:10.3760/cma.j.cn112338-20200301-00223. [Epub ahead of print] Chinese. PMID: 32213270. PubMed</p>                                                                                             | <p>No appropriate population sample</p> |
| <p>10: Chen XB, Du SH, Lu JC, Tan XH, Li DR, Yue X, Wang Q, Wang HJ, Qiao DF.Retrospective Analysis of 61 Cases of Children Died of Viral Pneumonia. <i>Fa Yi XueZa Zhi</i>. 2020 Mar 25;36(2). doi: 10.12116/j.issn.1004-5619.2020.02.002.</p>                                                                                                                                                                                       | <p>No appropriate population sample</p> |

|                                                                                                                                                                                                                                                                                                                                                                                                                                                                                                                                                                                                                                                     |                               |
|-----------------------------------------------------------------------------------------------------------------------------------------------------------------------------------------------------------------------------------------------------------------------------------------------------------------------------------------------------------------------------------------------------------------------------------------------------------------------------------------------------------------------------------------------------------------------------------------------------------------------------------------------------|-------------------------------|
| <p>[Epubahead of print] English, Chinese.<br/>PubMed PMID: 32212512.</p>                                                                                                                                                                                                                                                                                                                                                                                                                                                                                                                                                                            |                               |
| <p>11: Szerlip M, Anwaruddin S, Aronow HD, Cohen MG, Daniels MJ, Dehghani P, Drachman DE, Elmariah S, Feldman DN, Garcia S, Giri J, Kaul P, Kapur N, Kumbhani DJ, Meraj PM, Morray B, Nayak KR, Parikh SA, Sakhuja R, Schussler JM, Seto A, Shah B, Swaminathan RV, Zidar DA, Naidu SS. Considerations for Cardiac Catheterization Laboratory Procedures During the COVID-19 Pandemic Perspectives from the Society for Cardiovascular Angiography and Interventions Emerging Leader Mentorship (SCAI ELM) Members and Graduates. Catheter Cardiovasc Interv. 2020 Mar 25. doi: 10.1002/ccd.28887. [Epub ahead of print] PubMed PMID: 32212409.</p> | <p>No appropriate outcome</p> |
| <p>12: Brodin P. Why is COVID-19 so mild in children? Acta Paediatr. 2020 Mar 25. doi: 10.1111/apa.15271. [Epub ahead of print] PubMed PMID: 32212348.</p>                                                                                                                                                                                                                                                                                                                                                                                                                                                                                          | <p>No original article</p>    |
| <p>13: Candido DDS, Watts A, Abade L, Kraemer MUG, Pybus OG, Croda J, Oliveira W, Khan K, Sabino EC, Faria NR. Routes for COVID-19 importation in Brazil. J Travel Med. 2020 Mar 23. pii: taaa042. doi: 10.1093/jtm/taaa042. [Epub ahead of print] PubMed PMID: 32211799.</p>                                                                                                                                                                                                                                                                                                                                                                       | <p>No appropriate outcome</p> |
| <p>14: Xu B, Gutierrez B, Mekar S, Sewalk K, Goodwin L, Loskill A, Cohn EL, Hswen Y, Hill SC, Cobo MM, Zarebski AE, Li S, Wu CH, Hulland E, Morgan JD, Wang L, O'Brien K, Scarpino SV, Brownstein JS, Pybus OG, Pigott DM, Kraemer MUG. Epidemiological data from the COVID-19 outbreak, real-time case information. Sci Data. 2020 Mar 24;7(1):106. doi: 10.1038/s41597-020-0448-0. PubMed PMID: 32210236</p>                                                                                                                                                                                                                                      | <p>No appropriate outcome</p> |

|                                                                                                                                                                                                                                                                                                                                                                             |                                         |
|-----------------------------------------------------------------------------------------------------------------------------------------------------------------------------------------------------------------------------------------------------------------------------------------------------------------------------------------------------------------------------|-----------------------------------------|
| <p>15: Cron RQ, Chatham WW. The Rheumatologist's Role in Covid-19. <i>J Rheumatol.</i> 2020Mar 24. pii: jrheum.200334. doi: 10.3899/jrheum.200334. [Epub ahead of print]PubMed PMID: 32209661.</p>                                                                                                                                                                          | <p>No appropriate outcome</p>           |
| <p>16: Unadkat S, Farquhar M. Doctors' wellbeing: self-care during the covid-19pandemic. <i>BMJ.</i> 2020 Mar 24;368:m1150. doi: 10.1136/bmj.m1150. PubMed PMID:32209559</p>                                                                                                                                                                                                | <p>No appropriate population sample</p> |
| <p>17: An P, Zhang M. Novel coronavirus SARS-CoV-2: familial spread resulting inCOVID-19 pneumonia in a pediatric patient. <i>Diagn Interv Radiol.</i> 2020 Mar 25. doi:10.5152/dir.2020.20157. [Epub ahead of print] PubMed PMID: 32209502.</p>                                                                                                                            | <p>No appropriate population sample</p> |
| <p>18: Su L, Ma X, Yu H, Zhang Z, Bian P, Han Y, Sun J, Liu Y, Yang C, Geng J, ZhangZ, Gai Z. The different clinical characteristics of corona virus disease casesbetween children and their families in China - the character of children withCOVID-19. <i>Emerg Microbes Infect.</i> 2020 Dec;9(1):707-713. doi:10.1080/22221751.2020.1744483. PubMed PMID: 32208917.</p> | <p>No appropriate population sample</p> |
| <p>19: Giwa AL, Desai A, Duca A. Novel 2019 coronavirus SARS-CoV-2 (COVID-19): Anupdated overview for emergency clinicians. <i>Emerg Med Pract.</i> 2020 May1;22(5):1-28. Epub 2020 Mar 24. PubMed PMID: 32207910.</p>                                                                                                                                                      | <p>No original article</p>              |
| <p>20: Kang X, Zhang R, He H, Yao Y, Zheng Y, Wen X, Zhu S. [Anesthesia managementin cesarean section for a patient with coronavirus disease 2019]. <i>Zhejiang Da XueXue Bao Yi Xue Ban.</i> 2020 May 25;49(1):0. Chinese. PubMed PMID: 32207592.</p>                                                                                                                      | <p>No appropriate outcome</p>           |
| <p>21: Moro F, Buonsenso D, Moruzzi MC, Inchingolo R, Smargiassi A, Demi L, LariciAR, Scambia G, Lanzone A, Testa AC. How to perform lung ultrasound in pregnantwomen with suspected COVID-19 infection. <i>Ultrasound Obstet Gynecol.</i> 2020 Mar 24. doi:</p>                                                                                                            | <p>No appropriate outcome</p>           |

|                                                                                                                                                                                                                                                                                                                                                                                                                                        |                                         |
|----------------------------------------------------------------------------------------------------------------------------------------------------------------------------------------------------------------------------------------------------------------------------------------------------------------------------------------------------------------------------------------------------------------------------------------|-----------------------------------------|
| <p>10.1002/uog.22028. [Epub ahead of print]<br/>PubMed PMID: 32207208.</p>                                                                                                                                                                                                                                                                                                                                                             |                                         |
| <p>22: Lees C. ISUOG Safety Committee Position Statement: safe performance of obstetric and gynecological scans and equipment cleaning in the context of COVID-19. <i>Ultrasound Obstet Gynecol.</i> 2020 Mar 23. doi: 10.1002/uog.22027. [Epub ahead of print] PubMed PMID: 32207189.</p>                                                                                                                                             | <p>No appropriate outcome</p>           |
| <p>23: Zheng F, Liao C, Fan QH, Chen HB, Zhao XG, Xie ZG, Li XL, Chen CX, Lu XX, Liu ZS, Lu W, Chen CB, Jiao R, Zhang AM, Wang JT, Ding XW, Zeng YG, Cheng LP, Huang QF, Wu J, Luo XC, Wang ZJ, Zhong YY, Bai Y, Wu XY, Jin RM. Clinical Characteristics of Children with Coronavirus Disease 2019 in Hubei, China. <i>Curr Med Sci.</i> 2020 Mar 24. doi: 10.1007/s11596-020-2172-6. [Epub ahead of print] PubMed PMID: 32207032.</p> | <p>No appropriate population sample</p> |
| <p>24: Buckee CO, Balsari S, Chan J, Crosas M, Dominici F, Gasser U, Grad YH, Grenfell B, Halloran ME, Kraemer MUG, Lipsitch M, Metcalf CJE, Meyers LA, Perkins TA, Santillana M, Scarpino SV, Viboud C, Wesolowski A, Schroeder A. Aggregated mobility data could help fight COVID-19. <i>Science.</i> 2020 Mar 23. pii: eabb8021. doi: 10.1126/science.abb8021. [Epub ahead of print] PubMed PMID: 32205458.</p>                     | <p>No appropriate population sample</p> |
| <p>25: Rimmer A. Covid-19: doctors in final trimester of pregnancy should avoid direct patient contact. <i>BMJ.</i> 2020 Mar 23;368:m1173. doi: 10.1136/bmj.m1173. PubMed PMID: 32205356.</p>                                                                                                                                                                                                                                          | <p>No appropriate outcome</p>           |
| <p>26: Favalli EG, Ingegnoli F, De Lucia O, Cincinelli G, Cimaz R, Caporali R. COVID-19 infection and rheumatoid arthritis: Faraway, so close! <i>Autoimmun Rev.</i> 2020 Mar 20:102523. doi: 10.1016/j.autrev.2020.102523. [Epub ahead of print] Review. PubMed PMID: 32205186.</p>                                                                                                                                                   | <p>No appropriate population sample</p> |



|                                                                                                                                                                                                                                                                                                                                                                                                                                                                                   |                                         |
|-----------------------------------------------------------------------------------------------------------------------------------------------------------------------------------------------------------------------------------------------------------------------------------------------------------------------------------------------------------------------------------------------------------------------------------------------------------------------------------|-----------------------------------------|
| <p>27: Asperges E, Novati S, Muzzi A, Biscarini S, Sciarra M, Lupi M, Sambo M, Gallazzi I, Peverini M, Lago P, Mojoli F, Perlini S, Bruno R; COVID-19 IRCCS San Matteo Pavia Task Force. Rapid response to COVID-19 outbreak in Northern Italy: how to convert a classic infectious disease ward into a COVID-19 response centre. <i>J Hosp Infect.</i> 2020 Mar 20. pii: S0195-6701(20)30119-5. doi:10.1016/j.jhin.2020.03.020. [Epub ahead of print] PubMed PMID: 32205162.</p> | <p>No appropriate population sample</p> |
| <p>28: Palacios Cruz M, Santos E, Velázquez Cervantes MA, León Juárez M. COVID-19, a worldwide public health emergency. <i>Rev Clin Esp.</i> 2020 Mar 20. pii: S0014-2565(20)30092-8. doi: 10.1016/j.rce.2020.03.001. [Epub ahead of print] Review. English, Spanish. PubMed PMID: 32204922.</p>                                                                                                                                                                                  | <p>No appropriate population sample</p> |
| <p>29: Chen Z, DU LZ, Fu JF, Shu Q, Chen ZM, Shi LP, Wang W, Chen SH, Ma XL, Ye S, Sun W, Chen MY, Zhu HH, Huang GL, Luo FX. [Emergency plan for inter-hospital transfer of newborns with SARS-CoV-2 infection]. <i>Zhongguo Dang Dai Er Ke Za Zhi.</i> 2020 Mar;22(3):226-230. Chinese. PubMed PMID: 32204758.</p>                                                                                                                                                               | <p>No original article</p>              |
| <p>30: Zhang GX, Zhang AM, Huang L, Cheng LY, Liu ZX, Peng XL, Wang HW. [Twin girls infected with SARS-CoV-2]. <i>Zhongguo Dang Dai Er Ke Za Zhi.</i> 2020 Mar;22(3):221-225. Chinese. PubMed PMID: 32204757.</p>                                                                                                                                                                                                                                                                 | <p>No appropriate population sample</p> |
| <p>31: Zhou Y, Yang GD, Feng K, Huang H, Yun YX, Mou XY, Wang LF. [Clinical features and chest CT findings of coronavirus disease 2019 in infants and young children]. <i>Zhongguo Dang Dai Er Ke Za Zhi.</i> 2020 Mar;22(3):215-220. Chinese. PubMed PMID: 32204756</p>                                                                                                                                                                                                          | <p>No appropriate population sample</p> |
| <p>32: Wang J, Wang D, Chen GC, Tao XW, Zeng LK. [SARS-CoV-2 infection with gastrointestinal symptoms as the first manifestation in a neonate]. <i>Zhongguo Dang Dai Er Ke Za Zhi.</i> 2020 Mar;22(3):211-214. Chinese. PubMed PMID: 32204755.</p>                                                                                                                                                                                                                                | <p>Included</p>                         |

|                                                                                                                                                                                                                                                                                                                                                                                                             |                                         |
|-------------------------------------------------------------------------------------------------------------------------------------------------------------------------------------------------------------------------------------------------------------------------------------------------------------------------------------------------------------------------------------------------------------|-----------------------------------------|
| <p>33: Medical Association of Chinese People's Liberation Army; Editorial Committee of Chinese Journal of Contemporary Pediatrics; Preparatory Group of Pediatric Disaster, Pediatric Society, Chinese Medical Association. [Response plan in the neonatal intensive care unit during epidemic of SARS-CoV-2 infection (2nd Edition)]. Zhongguo Dang Dai Er Ke Za Zhi. 2020 Mar;22(3):205-210. Chinese.</p> | <p>No appropriate outcome</p>           |
| <p>34: Wang LS, Hu XJ, Zhou WH. [An interpretation on perinatal and neonatal management plan for prevention and control of SARS-CoV-2 infection (2nd Edition)]. Zhongguo Dang Dai Er Ke Za Zhi. 2020 Mar;22(3):199-204. Chinese. PubMed PMID: 32204753.</p>                                                                                                                                                 | <p>No original article</p>              |
| <p>35: Working Group for the Prevention and Control of Neonatal SARS-CoV-2 Infection in the Perinatal Period of the Editorial Committee of Chinese Journal of Contemporary Pediatrics. [Perinatal and neonatal management plan for prevention and control of SARS-CoV-2 infection (2nd Edition)]. Zhongguo Dang Dai Er Ke Za Zhi. 2020 Mar;22(3):195-198. Chinese. PubMed PMID: 32204752.</p>               | <p>No original article</p>              |
| <p>36: Marraro GA, Spada C. Consideration of the respiratory support strategy of severe acute respiratory failure caused by SARS-CoV-2 infection in children. Zhongguo Dang Dai Er Ke Za Zhi. 2020 Mar;22(3):183-194. PubMed PMID: 32204751.</p>                                                                                                                                                            | <p>No appropriate population sample</p> |
| <p>37: Subspecialty Group of Hematology and Oncology, Society of Pediatrics of Hubei. [Standardized management guideline for pediatric wards of hematology and oncology during the epidemic of coronavirus disease 2019]. Zhongguo Dang Dai Er Ke Za Zhi. 2020 Mar;22(3):177-182. Chinese. PubMed PMID: 32204750.</p>                                                                                       | <p>No appropriate population sample</p> |

|                                                                                                                                                                                                                                                                                                                                                                                                                                                                                         |                                         |
|-----------------------------------------------------------------------------------------------------------------------------------------------------------------------------------------------------------------------------------------------------------------------------------------------------------------------------------------------------------------------------------------------------------------------------------------------------------------------------------------|-----------------------------------------|
| <p>100: Li D, Wang D, Dong J, Wang N, Huang H, Xu H, Xia C. False-Negative Results of Real-Time Reverse-Transcriptase Polymerase Chain Reaction for Severe Acute Respiratory Syndrome Coronavirus 2: Role of Deep-Learning-Based CT Diagnosis and Insights from Two Cases. <i>Korean J Radiol.</i> 2020 Apr;21(4):505-508. doi: 10.3348/kjr.2020.0146. Epub 2020 Mar 5. Erratum in: <i>Korean J Radiol.</i> 2020 Mar 20;:. PubMed PMID: 32174053; PubMed Central PMCID: PMC7082661.</p> | <p>No appropriate population sample</p> |
| <p>1: Ramanathan K, Antognini D, Combes A, Paden M, Zakhary B, Ogino M, MacLaren G, Brodie D, Shekar K. Planning and provision of ECMO services for severe ARDS during the COVID-19 pandemic and other outbreaks of emerging infectious diseases. <i>Lancet Respir Med.</i> 2020 Mar 20. pii: S2213-2600(20)30121-1. doi: 10.1016/S2213-2600(20)30121-1. [Epub ahead of print] Review. PubMed PMID: 32203711</p>                                                                        | <p>No appropriate outcome</p>           |
| <p>2: Feng S, Shen C, Xia N, Song W, Fan M, Cowling BJ. Rational use of face masks in the COVID-19 pandemic. <i>Lancet Respir Med.</i> 2020 Mar 20. pii: S2213-2600(20)30134-X. doi: 10.1016/S2213-2600(20)30134-X. [Epub ahead of print] PubMed PMID: 32203710.</p>                                                                                                                                                                                                                    | <p>No appropriate outcome</p>           |
| <p>3: Buonsenso D, Pata D, Chiaretti A. COVID-19 outbreak: less stethoscope, more ultrasound. <i>Lancet Respir Med.</i> 2020 Mar 20. pii: S2213-2600(20)30120-X. doi: 10.1016/S2213-2600(20)30120-X. [Epub ahead of print] PubMed PMID: 32203708. 4: Hu TY, Frieman M, Wolfram J. Insights from nanomedicine into chloroquine</p>                                                                                                                                                       | <p>No appropriate outcome</p>           |
| <p>4: Hu TY, Frieman M, Wolfram J. Insights from nanomedicine into chloroquine efficacy against COVID-19. <i>Nat Nanotechnol.</i> 2020 Mar 23. doi: 10.1038/s41565-020-0674-9. [Epub ahead of print] PubMed PMID: 32203437.</p>                                                                                                                                                                                                                                                         | <p>No appropriate outcome</p>           |

|                                                                                                                                                                                                                                                                                                                                                                                                                             |                                         |
|-----------------------------------------------------------------------------------------------------------------------------------------------------------------------------------------------------------------------------------------------------------------------------------------------------------------------------------------------------------------------------------------------------------------------------|-----------------------------------------|
| <p>5: Ficarra V, Novara G, Abrate A, Bartoletti R, Crestani A, De Nunzio C, Giannarini G, Gregori A, Liguori G, Mirone V, Pavan N, Scarpa RM, Simonato A, Trombetta C, Tubaro A, Porpiglia F; Members of the Research Urology Network (RUN). Urology practice during COVID-19 pandemic. <i>Minerva Urol Nefrol.</i> 2020 Mar 23. doi: 10.23736/S0393-2249.20.03846-1. [Epub ahead of print] PubMed PMID: 32202401</p>       | <p>No appropriate population sample</p> |
| <p>6: Ludvigsson JF. Systematic review of COVID-19 in children show milder cases and a better prognosis than adults. <i>Acta Paediatr.</i> 2020 Mar 23. doi: 10.1111/apa.15270. [Epub ahead of print] PubMed PMID: 32202343.</p>                                                                                                                                                                                            | <p>No original article</p>              |
| <p>7: Britton PN, Marais BJ. Questions raised by COVID-19 case descriptions. <i>J Paediatr Child Health.</i> 2020 Mar 22. doi: 10.1111/jpc.14872. [Epub ahead of print] PubMed PMID: 32202002.</p>                                                                                                                                                                                                                          | <p>No original article</p>              |
| <p>8: Qian G, Yang N, Ma AHY, Wang L, Li G, Chen X, Chen X. A COVID-19 Transmission within a family cluster by presymptomatic infectors in China. <i>Clin Infect Dis.</i> 2020 Mar 23. pii: ciaa316. doi: 10.1093/cid/ciaa316. [Epub ahead of print] PubMed PMID: 32201889.</p>                                                                                                                                             | <p>No appropriate population sample</p> |
| <p>9: Colaneri M, Seminari E, Piralla A, Zuccaro V, Filippo AD, Baldanti F, Bruno R, Mondelli MU; COVID19 IRCCS San Matteo Pavia Task Force. Lack of SARS-CoV-2 RNA environmental contamination in a tertiary referral hospital for infectious diseases in Northern Italy. <i>J Hosp Infect.</i> 2020 Mar 19. pii: S0195-6701(20)30117-1. doi: 10.1016/j.jhin.2020.03.018. [Epub ahead of print] PubMed PMID: 32201338.</p> | <p>No appropriate outcome</p>           |
| <p>10: Peyronnet V, Sibiude J, Deruelle P, Huisoud C, Lescure X, Lucet JC, Mandelbrot L, Nisand I, Vayssière C, Yazpandanah Y, Luton D, Picone O. [Infection with SARS-CoV-2 in pregnancy. Information and proposed care. CNGOF.]. <i>Gynecol Obstet Fertil Senol.</i> 2020 Mar 18. pii: S2468-</p>                                                                                                                         | <p>No original article</p>              |

|                                                                                                                                                                                                                                                                                                                                            |                        |
|--------------------------------------------------------------------------------------------------------------------------------------------------------------------------------------------------------------------------------------------------------------------------------------------------------------------------------------------|------------------------|
| <p>7189(20)30110-0. doi: 10.1016/j.gofs.2020.03.014. [Epub ahead of print] French. PubMed PMID: 32199996.</p>                                                                                                                                                                                                                              |                        |
| <p>11: Hong H, Wang Y, Chung HT, Chen CJ. Clinical characteristics of novel coronavirus disease 2019 (COVID-19) in newborns, infants and children. <i>Pediatr Neonatol.</i> 2020 Mar 10. pii: S1875-9572(20)30026-7. doi: 10.1016/j.pedneo.2020.03.001. [Epub ahead of print] PubMed PMID: 32199864.</p>                                   | No original article    |
| <p>12: Lazzerini M, Putoto G. COVID-19 in Italy: momentous decisions and many uncertainties. <i>Lancet Glob Health.</i> 2020 Mar 18. pii: S2214-109X(20)30110-8. doi: 10.1016/S2214-109X(20)30110-8. [Epub ahead of print] PubMed PMID: 32199072.</p>                                                                                      | No appropriate outcome |
| <p>13: Soldati G, Smargiassi A, Inchingolo R, Buonsenso D, Perrone T, Briganti DF, Perlini S, Torri E, Mariani A, Mossolani EE, Tursi F, Mento F, Demi L. Is there a role for lung ultrasound during the COVID-19 pandemic? <i>J Ultrasound Med.</i> 2020 Mar 20. doi: 10.1002/jum.15284. [Epub ahead of print] PubMed PMID: 32198775.</p> | No appropriate outcome |
| <p>14: Deng Y, Lei L, Chen Y, Zhang W. The potential added value of FDG PET/CT for COVID-19 pneumonia. <i>Eur J Nucl Med Mol Imaging.</i> 2020 Mar 21. doi: 10.1007/s00259-020-04767-1. [Epub ahead of print] PubMed PMID: 32198615.</p>                                                                                                   | No appropriate outcome |
| <p>15: Duan Y, Zhu HL, Zhou C. Advance of promising targets and agents against 2019-nCoV in China. <i>Drug Discov Today.</i> 2020 Mar 17. pii: S1359-6446(20)30098-2. doi: 10.1016/j.drudis.2020.02.011. [Epub ahead of print] PubMed PMID: 32198066.</p>                                                                                  | No appropriate outcome |
| <p>16: Wen R, Sun Y, Xing QS. A patient with SARS-CoV-2 infection during pregnancy in Qingdao, China. <i>J Microbiol Immunol Infect.</i> 2020 Mar 10. pii: S1684-1182(20)30061-X. doi:</p>                                                                                                                                                 | Included               |

|                                                                                                                                                                                                                                                                                                                                     |                                  |
|-------------------------------------------------------------------------------------------------------------------------------------------------------------------------------------------------------------------------------------------------------------------------------------------------------------------------------------|----------------------------------|
| 10.1016/j.jmii.2020.03.004. [Epub ahead of print] PubMed PMID: 32198004.                                                                                                                                                                                                                                                            |                                  |
| 17: Yang T, Wang YC, Shen CF, Cheng CM. Point-of-Care RNA-Based Diagnostic Device for COVID-19. <i>Diagnostics (Basel)</i> . 2020 Mar 18;10(3). pii: E165. doi: 10.3390/diagnostics10030165. PubMed PMID: 32197339.                                                                                                                 | No appropriate outcome           |
| 18: Kinner SA, Young JT, Snow K, Southalan L, Lopez-Acuña D, Ferreira-Borges C, O'Moore É. Prisons and custodial settings are part of a comprehensive response to COVID-19. <i>Lancet Public Health</i> . 2020 Mar 17. pii: S2468-2667(20)30058-X. doi: 10.1016/S2468-2667(20)30058-X. [Epub ahead of print] PubMed PMID: 32197116. | No appropriate population sample |
| 19: Schmid MB, Fontijn J, Ochsenbein-Kölble N, Berger C, Bassler D. COVID-19 in pregnant women. <i>Lancet Infect Dis</i> . 2020 Mar 17. pii: S1473-3099(20)30175-4. doi: 10.1016/S1473-3099(20)30175-4. [Epub ahead of print] PubMed PMID: 32197098.                                                                                | No original article              |
| 20: Baud D, Giannoni E, Pomar L, Qi X, Nielsen-Saines K, Musso D, Favre G. COVID-19 in pregnant women - Authors' reply. <i>Lancet Infect Dis</i> . 2020 Mar 17. pii: S1473-3099(20)30192-4. doi: 10.1016/S1473-3099(20)30192-4. [Epub ahead of print] PubMed PMID: 32197096.                                                        | No original article              |
| 21: Yasri S, Wiwanitkit V. Clinical features in pediatric COVID-19. <i>Pediatr Pulmonol</i> . 2020 Mar 20. doi: 10.1002/ppul.24737. [Epub ahead of print] PubMed PMID: 32196995.                                                                                                                                                    | No appropriate population sample |
| 22: D'Antiga L. Coronaviruses and immunosuppressed patients. The facts during the third epidemic. <i>Liver Transpl</i> . 2020 Mar 20. doi: 10.1002/lt.25756. [Epub ahead of print] PubMed PMID: 32196933.                                                                                                                           | No appropriate population sample |

|                                                                                                                                                                                                                                                                                                                                                                                                                                                                                                                                                                                                                                 |                                         |
|---------------------------------------------------------------------------------------------------------------------------------------------------------------------------------------------------------------------------------------------------------------------------------------------------------------------------------------------------------------------------------------------------------------------------------------------------------------------------------------------------------------------------------------------------------------------------------------------------------------------------------|-----------------------------------------|
| <p>23: Dong X, Cao YY, Lu XX, Zhang JJ, Du H, Yan YQ, Akdis CA, Gao YD. Eleven Faces of Coronavirus Disease 2019. <i>Allergy</i>. 2020 Mar 20. doi: 10.1111/all.14289. [Epub ahead of print] PubMed PMID: 32196678.</p>                                                                                                                                                                                                                                                                                                                                                                                                         | <p>No appropriate population sample</p> |
| <p>24: Chen D, Yang H, Cao Y, Cheng W, Duan T, Fan C, Fan S, Feng L, Gao Y, He F, He J, Hu Y, Jiang Y, Li Y, Li J, Li X, Li X, Lin K, Liu C, Liu J, Liu X, Pan X, Pang Q, Pu M, Qi H, Shi C, Sun Y, Sun J, Wang X, Wang Y, Wang Z, Wang Z, Wang C, Wu S, Xin H, Yan J, Zhao Y, Zheng J, Zhou Y, Zou L, Zeng Y, Zhang Y, Guan X, Eppes CS, Fox K, Belfort MA. Expert consensus for managing pregnant women and neonates born to mothers with suspected or confirmed novel coronavirus (COVID-19) infection. <i>Int J Gynaecol Obstet</i>. 2020 Mar 20. doi: 10.1002/ijgo.13146. [Epub ahead of print] PubMed PMID: 32196655.</p> | <p>No original article</p>              |
| <p>25: Buonsenso D, Piano A, Raffaelli F, Bonadia N, de Gaetano Donati K, Franceschi F. Point-of-Care Lung Ultrasound findings in novel coronavirus disease-19 pneumoniae: a case report and potential applications during COVID-19 outbreak. <i>Eur Rev Med Pharmacol Sci</i>. 2020 Mar;24(5):2776-2780. doi: 10.26355/eurrev_202003_20549. PubMed PMID: 32196627.</p>                                                                                                                                                                                                                                                         | <p>No appropriate population sample</p> |
| <p>26: Smith AC, Thomas E, Snoswell CL, Haydon H, Mehrotra A, Clemensen J, Caffery LJ. Telehealth for global emergencies: Implications for coronavirus disease 2019 (COVID-19). <i>J Telemed Telecare</i>. 2020 Mar 20:1357633X20916567. doi: 10.1177/1357633X20916567. [Epub ahead of print] PubMed PMID: 32196391.</p>                                                                                                                                                                                                                                                                                                        | <p>No appropriate outcome</p>           |
| <p>27: Zhou D, Dai SM, Tong Q. COVID-19: a recommendation to examine the effect of hydroxychloroquine in preventing infection and progression. <i>J Antimicrob Chemother</i>. 2020 Mar 20. pii: dkaa114. doi: 10.1093/jac/dkaa114. [Epub ahead of print] PubMed PMID: 32196083.</p>                                                                                                                                                                                                                                                                                                                                             | <p>No appropriate outcome</p>           |

|                                                                                                                                                                                                                                                                                                                                    |                                         |
|------------------------------------------------------------------------------------------------------------------------------------------------------------------------------------------------------------------------------------------------------------------------------------------------------------------------------------|-----------------------------------------|
| <p>28: Choe YJ, Choi EH. Are We Ready for Coronavirus Disease 2019 Arriving at Schools? <i>J Korean Med Sci.</i> 2020 Mar 23;35(11):e127. doi: 10.3346/jkms.2020.35.e127. PubMed PMID: 32193906.</p>                                                                                                                               | <p>No appropriate population sample</p> |
| <p>29: Park JY, Han MS, Park KU, Kim JY, Choi EH. First Pediatric Case of Coronavirus Disease 2019 in Korea. <i>J Korean Med Sci.</i> 2020 Mar 23;35(11):e124. doi: 10.3346/jkms.2020.35.e124. PubMed PMID: 32193905.</p>                                                                                                          | <p>No appropriate population sample</p> |
| <p>30: Sun D, Li H, Lu XX, Xiao H, Ren J, Zhang FR, Liu ZS. Clinical features of severe pediatric patients with coronavirus disease 2019 in Wuhan: a single center's observational study. <i>World J Pediatr.</i> 2020 Mar 19. doi: 10.1007/s12519-020-00354-4. [Epub ahead of print] PubMed PMID: 32193831.</p>                   | <p>No appropriate population sample</p> |
| <p>31: Mahase E. Covid-19: schools set to close across UK except for children of health and social care workers. <i>BMJ.</i> 2020 Mar 19;368:m1140. doi: 10.1136/bmj.m1140. PubMed PMID: 32193197.</p>                                                                                                                             | <p>No appropriate population sample</p> |
| <p>32: Lippi G, Henry BM. Active smoking is not associated with severity of coronavirus disease 2019 (COVID-19). <i>Eur J Intern Med.</i> 2020 Mar 16. pii: S0953-6205(20)30110-2. doi: 10.1016/j.ejim.2020.03.014. [Epub ahead of print] PubMed PMID: 32192856.</p>                                                               | <p>No appropriate population sample</p> |
| <p>33: Mehta P, McAuley DF, Brown M, Sanchez E, Tattersall RS, Manson JJ; HLH Across Speciality Collaboration, UK. COVID-19: consider cytokine storm syndromes and immunosuppression. <i>Lancet.</i> 2020 Mar 16. pii: S0140-6736(20)30628-0. doi: 10.1016/S0140-6736(20)30628-0. [Epub ahead of print] PubMed PMID: 32192578.</p> | <p>No appropriate outcome</p>           |
| <p>34: COVID-19 National Incident Room Surveillance Team. COVID-19, Australia: Epidemiology Report 7 (Reporting week ending 19:00 AEDT 14 March 2020). <i>Commun Dis Intell (2018).</i> 2020 Mar 19;44. doi:</p>                                                                                                                   | <p>No appropriate outcome</p>           |



|                                                                                                                                                                                                                                                                                                                                                                                                                             |                                  |
|-----------------------------------------------------------------------------------------------------------------------------------------------------------------------------------------------------------------------------------------------------------------------------------------------------------------------------------------------------------------------------------------------------------------------------|----------------------------------|
| 10.33321/cdi.2020.44.23. PubMed PMID: 32192424                                                                                                                                                                                                                                                                                                                                                                              |                                  |
| 35: Baglivo M, Baronio M, Natalini G, Beccari T, Chiurazzi P, Fulcheri E, Petralia PP, Michelini S, Fiorentini G, Miggiano GA, Morresi A, Tonini G, Bertelli M. Natural small molecules as inhibitors of coronavirus lipid-dependent attachment to host cells: a possible strategy for reducing SARS-COV-2 infectivity? <i>Acta Biomed.</i> 2020 Mar 19;91(1):161-164. doi: 10.23750/abm.v91i1.9402. PubMed PMID: 32191676. | No appropriate outcome           |
| 36: Sahu KK, Lal A, Mishra AK. COVID-2019 and Pregnancy: A plea for transparent reporting of all cases. <i>Acta Obstet Gynecol Scand.</i> 2020 Mar 19. doi: 10.1111/aogs.13850. [Epub ahead of print] PubMed PMID: 32191350.                                                                                                                                                                                                | No original article              |
| 37: Rimmer A. Covid-19: pregnant doctors should speak to occupational health, say experts. <i>BMJ.</i> 2020 Mar 18;368:m1104. doi: 10.1136/bmj.m1104. PubMed PMID: 32188586                                                                                                                                                                                                                                                 | No appropriate outcome           |
| 38: Li Y, Guo F, Cao Y, Li L, Guo Y. Insight into COVID-2019 for pediatricians. <i>Pediatr Pulmonol.</i> 2020 Mar 18. doi: 10.1002/ppul.24734. [Epub ahead of print] PubMed PMID: 32187887.                                                                                                                                                                                                                                 | No appropriate population sample |
| 39: Cossarizza A, De Biasi S, Guaraldi G, Girardis M, Mussini C; Modena Covid-19 Working Group (MoCo19)#. SARS-CoV-2, the Virus that Causes COVID-19: Cytometry and the New Challenge for Global Health. <i>Cytometry A.</i> 2020 Mar 18. doi: 10.1002/cyto.a.24002. [Epub ahead of print] PubMed PMID: 32187834.                                                                                                           | No appropriate outcome           |

|                                                                                                                                                                                                                                                                                                                                                                                                              |                                  |
|--------------------------------------------------------------------------------------------------------------------------------------------------------------------------------------------------------------------------------------------------------------------------------------------------------------------------------------------------------------------------------------------------------------|----------------------------------|
| <p>40: Lu X, Zhang L, Du H, Zhang J, Li YY, Qu J, Zhang W, Wang Y, Bao S, Li Y, Wu C, Liu H, Liu D, Shao J, Peng X, Yang Y, Liu Z, Xiang Y, Zhang F, Silva RM, Pinkerton KE, Shen K, Xiao H, Xu S, Wong GWK; Chinese Pediatric Novel Coronavirus Study Team. SARS-CoV-2 Infection in Children. <i>N Engl J Med.</i> 2020 Mar 18. doi: 10.1056/NEJMc2005073. [Epub ahead of print] PubMed PMID: 32187458.</p> | No original article              |
| <p>41: Liu D, Li L, Wu X, Zheng D, Wang J, Yang L, Zheng C. Pregnancy and Perinatal Outcomes of Women With Coronavirus Disease (COVID-19) Pneumonia: A Preliminary Analysis. <i>AJR Am J Roentgenol.</i> 2020 Mar 18;1-6. doi: 10.2214/AJR.20.23072. [Epub ahead of print] PubMed PMID: 32186894.</p>                                                                                                        | Included                         |
| <p>42: Rashidi Fakari F, Simbar M. Coronavirus Pandemic and Worries during Pregnancy; a Letter to Editor. <i>Arch Acad Emerg Med.</i> 2020 Mar 16;8(1):e21. eCollection 2020. PubMed PMID: 32185371; PubMed Central PMCID: PMC7075675.</p>                                                                                                                                                                   | No original article              |
| <p>43: Mizumoto K, Kagaya K, Zarebski A, Chowell G. Estimating the asymptomatic proportion of coronavirus disease 2019 (COVID-19) cases on board the Diamond Princess cruise ship, Yokohama, Japan, 2020. <i>Euro Surveill.</i> 2020 Mar;25(10). doi: 10.2807/1560-7917.ES.2020.25.10.2000180. PubMed PMID: 32183930.</p>                                                                                    | No appropriate population sample |
| <p>44: Fan C, Lei D, Fang C, Li C, Wang M, Liu Y, Bao Y, Sun Y, Huang J, Guo Y, Yu Y, Wang S. Perinatal Transmission of COVID-19 Associated SARS-CoV-2: Should We Worry? <i>Clin Infect Dis.</i> 2020 Mar 17. pii: ciaa226. doi: 10.1093/cid/ciaa226. [Epub ahead of print] PubMed PMID: 32182347.</p>                                                                                                       | Included                         |
| <p>45: Gao Y, Li T, Han M, Li X, Wu D, Xu Y, Zhu Y, Liu Y, Wang X, Wang L. Diagnostic Utility of Clinical Laboratory Data Determinations for Patients with the Severe COVID-19. <i>J Med Virol.</i> 2020 Mar 17. doi:</p>                                                                                                                                                                                    | No appropriate outcome           |

|                                                                                                                                                                                                                                                                                                                   |                                  |
|-------------------------------------------------------------------------------------------------------------------------------------------------------------------------------------------------------------------------------------------------------------------------------------------------------------------|----------------------------------|
| 10.1002/jmv.25770. [Epub ahead of print] PubMed PMID: 32181911.                                                                                                                                                                                                                                                   |                                  |
| 46: Jiao J. Under the epidemic situation of COVID-19, should special attention to pregnant women be given? J Med Virol. 2020 Mar 17. doi: 10.1002/jmv.25771. [Epub ahead of print] PubMed PMID: 32181904.                                                                                                         | No original article              |
| 47: Schwartz DA. An Analysis of 38 Pregnant Women with COVID-19, Their Newborn Infants, and Maternal-Fetal Transmission of SARS-CoV-2: Maternal Coronavirus Infections and Pregnancy Outcomes. Arch Pathol Lab Med. 2020 Mar 17. doi: 10.5858/arpa.2020-0901-SA. [Epub ahead of print] PubMed PMID: 32180426.     | No original article              |
| 48: Mullins E, Evans D, Viner RM, O'Brien P, Morris E. Coronavirus in pregnancy and delivery: rapid review. Ultrasound Obstet Gynecol. 2020 Mar 17. doi: 10.1002/uog.22014. [Epub ahead of print] Review. PubMed PMID: 32180292.                                                                                  | No original article              |
| 49: Chen R, Zhang Y, Huang L, Cheng BH, Xia ZY, Meng QT. Safety and efficacy of different anesthetic regimens for parturients with COVID-19 undergoing Cesarean delivery: a case series of 17 patients. Can J Anaesth. 2020 Mar 16. doi: 10.1007/s12630-020-01630-7. [Epub ahead of print] PubMed PMID: 32180175. | Included                         |
| 50: Ji LN, Chao S, Wang YJ, Li XJ, Mu XD, Lin MG, Jiang RM. Clinical features of pediatric patients with COVID-19: a report of two family cluster cases. World J Pediatr. 2020 Mar 16. doi: 10.1007/s12519-020-00356-2. [Epub ahead of print] PubMed PMID: 32180140.                                              | No appropriate population sample |

|                                                                                                                                                                                                                                                                                                                                                                                                                                                                                                                                                                                                                                                                                                                                                                                                                         |                                         |
|-------------------------------------------------------------------------------------------------------------------------------------------------------------------------------------------------------------------------------------------------------------------------------------------------------------------------------------------------------------------------------------------------------------------------------------------------------------------------------------------------------------------------------------------------------------------------------------------------------------------------------------------------------------------------------------------------------------------------------------------------------------------------------------------------------------------------|-----------------------------------------|
| <p>51: Wang Y, Liu Y, Liu L, Wang X, Luo N, Ling L. Clinical outcome of 55 asymptomatic cases at the time of hospital admission infected with SARS-Coronavirus-2 in Shenzhen, China. <i>J Infect Dis.</i> 2020 Mar 17. pii: jiaa119. doi: 10.1093/infdis/jiaa119. [Epub ahead of print] PubMed PMID: 32179910.</p>                                                                                                                                                                                                                                                                                                                                                                                                                                                                                                      | <p>No appropriate population sample</p> |
| <p>52: Cui Y, Tian M, Huang D, Wang X, Huang Y, Fan L, Wang L, Chen Y, Liu W, Zhang K, Wu Y, Yang Z, Tao J, Feng J, Liu K, Ye X, Wang R, Zhang X, Zha Y. A 55-Day-Old Female Infant infected with COVID 19: presenting with pneumonia, liver injury, and heart damage. <i>J Infect Dis.</i> 2020 Mar 17. pii: jiaa113. doi: 10.1093/infdis/jiaa113. [Epub ahead of print] PubMed PMID: 32179908.</p>                                                                                                                                                                                                                                                                                                                                                                                                                    | <p>No appropriate population sample</p> |
| <p>53: Dong Y, Mo X, Hu Y, Qi X, Jiang F, Jiang Z, Tong S. Epidemiological Characteristics of 2143 Pediatric Patients With 2019 Coronavirus Disease in China. <i>Pediatrics.</i> 2020 Mar 16. pii: e20200702. doi: 10.1542/peds.2020-0702. [Epub ahead of print] PubMed PMID: 32179660.</p>                                                                                                                                                                                                                                                                                                                                                                                                                                                                                                                             | <p>No appropriate population sample</p> |
| <p>54: COVID-19 in Children: Initial Characterization of the Pediatric Disease. <i>Pediatrics.</i> 2020 Mar 16. pii: e20200834. doi: 10.1542/peds.2020-0834. [Epub ahead of print] PubMed PMID: 32179659.</p>                                                                                                                                                                                                                                                                                                                                                                                                                                                                                                                                                                                                           | <p>No appropriate population sample</p> |
| <p>55: Rodriguez-Morales AJ, Cardona-Ospina JA, Gutiérrez-Ocampo E, Villamizar-Peña R, Holguin-Rivera Y, Escalera-Antezana JP, Alvarado-Arnez LE, Bonilla-Aldana DK, Franco-Paredes C, Henao-Martinez AF, Paniz-Mondolfi A, Lagos-Grisales GJ, Ramírez-Vallejo E, Suárez JA, Zambrano LI, Villamil-Gómez WE, Balbin-Ramon GJ, Rabaan AA, Harapan H, Dhama K, Nishiura H, Kataoka H, Ahmad T, Sah R; Latin American Network of Coronavirus Disease 2019-COVID-19 Research (LANCOVID-19). Electronic address: <a href="https://www.lancovid.org">https://www.lancovid.org</a>. Clinical, laboratory and imaging features of COVID-19: A systematic review and meta-analysis. <i>Travel Med Infect Dis.</i> 2020 Mar 13:101623. doi: 10.1016/j.tmaid.2020.101623. [Epub ahead of print] Review. PubMed PMID: 32179124.</p> | <p>No original article</p>              |

|                                                                                                                                                                                                                                                                                                                                                           |                                         |
|-----------------------------------------------------------------------------------------------------------------------------------------------------------------------------------------------------------------------------------------------------------------------------------------------------------------------------------------------------------|-----------------------------------------|
| <p>56: Lippi G, Plebani M, Michael Henry B. Thrombocytopenia is associated with severe coronavirus disease 2019 (COVID-19) infections: A meta-analysis. Clin Chim Acta. 2020 Mar 13. pii: S0009-8981(20)30124-8. doi: 10.1016/j.cca.2020.03.022. [Epub ahead of print] PubMed PMID: 32178975.</p>                                                         | <p>No appropriate population sample</p> |
| <p>57: Zhao S, Ling K, Yan H, Zhong L, Peng X, Yao S, Huang J, Chen X. Anesthetic Management of Patients With Suspected or Confirmed 2019 Novel Coronavirus Infection During Emergency Procedures. J Cardiothorac Vasc Anesth. 2020 Feb 28. pii: S1053-0770(20)30197-X. doi: 10.1053/j.jvca.2020.02.039. [Epub ahead of print] PubMed PMID: 32178954.</p> | <p>No appropriate population sample</p> |
| <p>58: Henry BM. COVID-19, ECMO, and lymphopenia: a word of caution. Lancet Respir Med. 2020 Mar 13. pii: S2213-2600(20)30119-3. doi: 10.1016/S2213-2600(20)30119-3. [Epub ahead of print] PubMed PMID: 32178774.</p>                                                                                                                                     | <p>No appropriate outcome</p>           |
| <p>59: Cimolai N. Potentially repurposing adamantanes for COVID-19. J Med Virol. 2020 Mar 16. doi: 10.1002/jmv.25752. [Epub ahead of print] PubMed PMID: 32176361.</p>                                                                                                                                                                                    | <p>No appropriate outcome</p>           |
| <p>60: Yang S, Cao P, Du P, Wu Z, Zhuang Z, Yang L, Yu X, Zhou Q, Feng X, Wang X, Li W, Liu E, Chen J, Chen Y, He D. Early estimation of the case fatality rate of COVID-19 in mainland China: a data-driven analysis. Ann Transl Med. 2020 Feb;8(4):128. doi: 10.21037/atm.2020.02.66. PubMed PMID: 32175421; PubMed Central PMCID: PMC7049028.</p>      | <p>No appropriate outcome</p>           |
| <p>61: Zhang J, Peng P, Li X, Zha YF, Zhang GN, Zhang Y, Xiang Y. [Management strategies for patients with gynecological malignancies during the outbreak of COVID19]. Zhonghua Fu Chan Ke Za Zhi. 2020 Mar 16;55(0):E011. doi: 10.3760/cma.j.cn112141-20200302-00168. [Epub ahead of print] Chinese. PubMed PMID: 32174096.</p>                          | <p>No appropriate population sample</p> |

|                                                                                                                                                                                                                                                                                                                                                                                                                                                                                                                                                                                                        |                                         |
|--------------------------------------------------------------------------------------------------------------------------------------------------------------------------------------------------------------------------------------------------------------------------------------------------------------------------------------------------------------------------------------------------------------------------------------------------------------------------------------------------------------------------------------------------------------------------------------------------------|-----------------------------------------|
| <p>62: Korean Society of Infectious Diseases; Korean Society of Pediatric Infectious Diseases; Korean Society of Epidemiology; Korean Society for Antimicrobial Therapy; Korean Society for Healthcare-associated Infection Control and Prevention; Korea Centers for Disease Control and Prevention. Report on the Epidemiological Features of Coronavirus Disease 2019 (COVID-19) Outbreak in the Republic of Korea from January 19 to March 2, 2020. <i>J Korean Med Sci.</i> 2020 Mar 16;35(10):e112. doi: 10.3346/jkms.2020.35.e112. PubMed PMID: 32174069; PubMed Central PMCID: PMC7073313.</p> | <p>No appropriate outcome</p>           |
| <p>63: Lai CC, Liu YH, Wang CY, Wang YH, Hsueh SC, Yen MY, Ko WC, Hsueh PR. Asymptomatic carrier state, acute respiratory disease, and pneumonia due to severe acute respiratory syndrome coronavirus 2 (SARS-CoV-2): Facts and myths. <i>J Microbiol Immunol Infect.</i> 2020 Mar 4. pii: S1684-1182(20)30040-2. doi: 10.1016/j.jmii.2020.02.012. [Epub ahead of print] Review. PubMed PMID: 32173241.</p>                                                                                                                                                                                            | <p>No appropriate population sample</p> |
| <p>64: Calvo C, García López-Hortelano M, de Carlos Vicente JC, Vázquez Martínez JL; Grupo de trabajo de la Asociación Española de Pediatría para el brote de infección por Coronavirus, colaboradores con el Ministerio de Sanidad; Miembros del Grupo de Expertos de la AEP. [Recommendations on the clinical management of the COVID-19 infection by the «new coronavirus» SARS-CoV2. Spanish Paediatric Association working group]. <i>An Pediatr (Barc).</i> 2020 Mar 12. pii:S1695-4033(20)30076-X. doi: 10.1016/j.anpedi.2020.02.001. [Epub ahead of print] Spanish. PubMed PMID: 32173188.</p> | <p>No original article</p>              |
| <p>65: Henry BM, Lippi G, Plebani M. Laboratory abnormalities in children with novel coronavirus disease 2019. <i>Clin Chem Lab Med.</i> 2020 Mar 16. pii: /j/cclm.ahead-of-print/cclm-2020-0272/cclm-2020-0272.xml. doi: 10.1515/cclm-2020-0272. [Epub ahead of print] PubMed PMID: 32172227.</p>                                                                                                                                                                                                                                                                                                     | <p>No original article</p>              |

|                                                                                                                                                                                                                                                                                                                                                                                                                                                                                                                      |                                  |
|----------------------------------------------------------------------------------------------------------------------------------------------------------------------------------------------------------------------------------------------------------------------------------------------------------------------------------------------------------------------------------------------------------------------------------------------------------------------------------------------------------------------|----------------------------------|
| <p>66: Liu H, Liu F, Li J, Zhang T, Wang D, Lan W. Clinical and CT Imaging Features of the COVID-19 Pneumonia: Focus on Pregnant Women and Children. <i>J Infect.</i> 2020 Mar 11. pii: S0163-4453(20)30118-3. doi: 10.1016/j.jinf.2020.03.007. [Epub ahead of print] PubMed PMID: 32171865.</p>                                                                                                                                                                                                                     | Overlapping data                 |
| <p>67: Baud D, Qi X, Nielsen-Saines K, Musso D, Pomar L, Favre G. Real estimates of mortality following COVID-19 infection. <i>Lancet Infect Dis.</i> 2020 Mar 12. pii: S1473-3099(20)30195-X. doi: 10.1016/S1473-3099(20)30195-X. [Epub ahead of print] PubMed PMID: 32171390.</p>                                                                                                                                                                                                                                  | No appropriate population sample |
| <p>68: Thompson LA, Rasmussen SA. What Does the Coronavirus Disease 2019 (COVID-19) Mean for Families? <i>JAMA Pediatr.</i> 2020 Mar 13. doi: 10.1001/jamapediatrics.2020.0828. [Epub ahead of print] PubMed PMID: 32167533.</p>                                                                                                                                                                                                                                                                                     | No appropriate outcome           |
| <p>69: Wu C, Chen X, Cai Y, Xia J, Zhou X, Xu S, Huang H, Zhang L, Zhou X, Du C, Zhang Y, Song J, Wang S, Chao Y, Yang Z, Xu J, Zhou X, Chen D, Xiong W, Xu L, Zhou F, Jiang J, Bai C, Zheng J, Song Y. Risk Factors Associated With Acute Respiratory Distress Syndrome and Death in Patients With Coronavirus Disease 2019 Pneumonia in Wuhan, China. <i>JAMA Intern Med.</i> 2020 Mar 13. doi: 10.1001/jamainternmed.2020.0994. [Epub ahead of print] PubMed PMID: 32167524;PubMed Central PMCID: PMC7070509.</p> | No appropriate population sample |
| <p>70: Singhal T. A Review of Coronavirus Disease-2019 (COVID-19). <i>Indian J Pediatr.</i> 2020 Apr;87(4):281-286. doi: 10.1007/s12098-020-03263-6. Epub 2020 Mar 13. Review. PubMed PMID: 32166607.</p>                                                                                                                                                                                                                                                                                                            | No original article              |
| <p>71: Ng OT, Marimuthu K, Chia PY, Koh V, Chiew CJ, De Wang L, Young BE, Chan M, Vasoo S, Ling LM, Lye DC, Kam KQ, Thoon KC, Kurupatham L, Said Z, Goh E, Low C, Lim SK, Raj P, Oh O, Koh VTJ, Poh C, Mak TM, Cui L, Cook AR, Lin RTP, Leo YS, Lee VJM. SARS-CoV-2 Infection among Travelers Returning from Wuhan, China. <i>N Engl J Med.</i></p>                                                                                                                                                                  | No appropriate population sample |

|                                                                                                                                                                                                                                                                                                                                                                                     |                                  |
|-------------------------------------------------------------------------------------------------------------------------------------------------------------------------------------------------------------------------------------------------------------------------------------------------------------------------------------------------------------------------------------|----------------------------------|
| <p>2020 Mar 12. doi: 10.1056/NEJMc2003100.<br/>[Epub ahead of print] PubMed PMID: 32163698</p>                                                                                                                                                                                                                                                                                      |                                  |
| <p>72: Liu W, Zhang Q, Chen J, Xiang R, Song H, Shu S, Chen L, Liang L, Zhou J, You L, Wu P, Zhang B, Lu Y, Xia L, Huang L, Yang Y, Liu F, Semple MG, Cowling BJ, Lan K, Sun Z, Yu H, Liu Y. Detection of Covid-19 in Children in Early January 2020 in Wuhan, China. <i>N Engl J Med</i>. 2020 Mar 12. doi: 10.1056/NEJMc2003717. [Epub ahead of print] PubMed PMID: 32163697.</p> | No original article              |
| <p>73: Li W, Cui H, Li K, Fang Y, Li S. Chest computed tomography in children with COVID-19 respiratory infection. <i>Pediatr Radiol</i>. 2020 Mar 11. doi: 10.1007/s00247-020-04656-7. [Epub ahead of print] PubMed PMID: 32162081.</p>                                                                                                                                            | No appropriate population sample |
| <p>74: Wang S, Guo L, Chen L, Liu W, Cao Y, Zhang J, Feng L. A case report of neonatal COVID-19 infection in China. <i>Clin Infect Dis</i>. 2020 Mar 12. pii: ciaa225. doi: 10.1093/cid/ciaa225. [Epub ahead of print] PubMed PMID: 32161941.</p>                                                                                                                                   | Overlapping data                 |
| <p>75: Stower H. Lack of maternal-fetal SARS-CoV-2 transmission. <i>Nat Med</i>. 2020 Mar;26(3):312. doi: 10.1038/s41591-020-0810-y. PubMed PMID: 32161408.</p>                                                                                                                                                                                                                     | No original article              |
| <p>76: Poon LC, Yang H, Lee JCS, Copel JA, Leung TY, Zhang Y, Chen D, Prefumo F. ISUOG Interim Guidance on 2019 novel coronavirus infection during pregnancy and puerperium: information for healthcare professionals. <i>Ultrasound Obstet Gynecol</i>. 2020 Mar 11. doi: 10.1002/uog.22013. [Epub ahead of print] PubMed PMID: 32160345.</p>                                      | No original article              |



|                                                                                                                                                                                                                                                                                                                                                                                                                                                                                                                                                                                                                                                                                                                                                                                                                                                                                        |                                         |
|----------------------------------------------------------------------------------------------------------------------------------------------------------------------------------------------------------------------------------------------------------------------------------------------------------------------------------------------------------------------------------------------------------------------------------------------------------------------------------------------------------------------------------------------------------------------------------------------------------------------------------------------------------------------------------------------------------------------------------------------------------------------------------------------------------------------------------------------------------------------------------------|-----------------------------------------|
| <p>77: Spiteri G, Fielding J, Diercke M, Campese C, Enouf V, Gaymard A, Bella A, Sognamiglio P, Sierra Moros MJ, Riutort AN, Demina YV, Mahieu R, Broas M, Bengnér M, Buda S, Schilling J, Filleul L, Lepoutre A, Saura C, Mailles A, Levy-Bruhl D, Coignard B, Bernard-Stoecklin S, Behillil S, van der Werf S, Valette M, Lina B, Riccardo F, Nicastrì E, Casas I, Larrauri A, Salom Castell M, Pozo F, Maksyutov RA, Martin C, Van Ranst M, Bossuyt N, Siira L, Sane J, Tegmark-Wisell K, PalmérusM, Broberg EK, Beauté J, Jorgensen P, Bundle N, Pereyaslov D, Adlhoch C, Pukkila J, Pebody R, Olsen S, Ciancio BC. First cases of coronavirus disease 2019 (COVID-19) in the WHO European Region, 24 January to 21 February 2020. <i>Euro Surveill.</i> 2020 Mar;25(9). doi: 10.2807/1560-7917.ES.2020.25.9.2000178. PubMed PMID: 32156327; PubMed Central PMCID: PMC7068164.</p> | <p>No appropriate population sample</p> |
| <p>78: COVID-19 National Incident Room Surveillance Team. COVID-19, Australia: Epidemiology Report 6 (Reporting week ending 19:00 AEDT 7 March 2020). <i>Commun Dis Intell</i> (2018). 2020 Mar 11;44. doi: 10.33321/cdi.2020.44.21. PubMed PMID: 32156224</p>                                                                                                                                                                                                                                                                                                                                                                                                                                                                                                                                                                                                                         | <p>No appropriate outcome</p>           |
| <p>79: Li W, Zhou Q, Tang Y, Ren L, Yu X, Li Q, Liu E, Chen Y; COVID-19 evidence and recommendations working group. Protocol for the development of a rapid advice guideline for prevention, management and care of children with 2019 novel coronavirus infection. <i>Ann Palliat Med.</i> 2020 Feb 24. pii: apm.2020.02.33. doi: 10.21037/apm.2020.02.33. [Epub ahead of print] PubMed PMID: 32156144.</p>                                                                                                                                                                                                                                                                                                                                                                                                                                                                           | <p>No original article</p>              |
| <p>80: Wang C, Pan R, Wan X, Tan Y, Xu L, Ho CS, Ho RC. Immediate Psychological Responses and Associated Factors during the Initial Stage of the 2019 Coronavirus Disease (COVID-19) Epidemic among the General Population in China. <i>Int J Environ Res Public Health.</i> 2020 Mar 6;17(5). pii: E1729. doi: 10.3390/ijerph17051729. PubMed PMID: 32155789.</p>                                                                                                                                                                                                                                                                                                                                                                                                                                                                                                                     | <p>No appropriate outcome</p>           |

|                                                                                                                                                                                                                                                                                                                                                                                                                                                                                                                                                                                                                                            |                     |
|--------------------------------------------------------------------------------------------------------------------------------------------------------------------------------------------------------------------------------------------------------------------------------------------------------------------------------------------------------------------------------------------------------------------------------------------------------------------------------------------------------------------------------------------------------------------------------------------------------------------------------------------|---------------------|
| <p>81: Hageman JR. The Coronavirus Disease 2019 (COVID-19). <i>Pediatr Ann.</i> 2020 Mar 1;49(3):e99-e100. doi: 10.3928/19382359-20200219-01. PubMed PMID: 32155273.</p>                                                                                                                                                                                                                                                                                                                                                                                                                                                                   | No original article |
| <p>82: Wang L, Shi Y, Xiao T, Fu J, Feng X, Mu D, Feng Q, Hei M, Hu X, Li Z, Lu G, Tang Z, Wang Y, Wang C, Xia S, Xu J, Yang Y, Yang J, Zeng M, Zheng J, Zhou W, Zhou X, Zhou X, Du L, Lee SK, Zhou W; Working Committee on Perinatal and Neonatal Management for the Prevention and Control of the 2019 Novel Coronavirus Infection. Chinese expert consensus on the perinatal and neonatal management for the prevention and control of the 2019 novel coronavirus infection (Firstedition). <i>Ann Transl Med.</i> 2020 Feb;8(3):47. doi: 10.21037/atm.2020.02.20. Review. PubMed PMID: 32154287; PubMed Central PMCID: PMC7036629.</p> | No original article |
| <p>83: Zhu H, Wang L, Fang C, Peng S, Zhang L, Chang G, Xia S, Zhou W. Clinical analysis of 10 neonates born to mothers with 2019-nCoV pneumonia. <i>Transl Pediatr.</i> 2020 Feb;9(1):51-60. doi: 10.21037/tp.2020.02.06. PubMed PMID: 32154135; PubMed Central PMCID: PMC7036645.</p>                                                                                                                                                                                                                                                                                                                                                    | Included            |
| <p>84: Caselli D, Aricò M. 2019-nCoV: Polite with children! <i>Pediatr Rep.</i> 2020 Feb 11;12(1):8495. doi: 10.4081/pr.2020.8495. eCollection 2020 Feb 11. PubMed PMID: 32153742; PubMed Central PMCID: PMC7036705.</p>                                                                                                                                                                                                                                                                                                                                                                                                                   | No original article |
| <p>85: Chen H, Guo J, Wang C, Luo F, Yu X, Zhang W, Li J, Zhao D, Xu D, Gong Q, Liao J, Yang H, Hou W, Zhang Y. Clinical characteristics and intrauterine vertical transmission potential of COVID-19 infection in nine pregnant women: a retrospective review of medical records. <i>Lancet.</i> 2020 Mar 7;395(10226):809-815. doi: 10.1016/S0140-6736(20)30360-3. Epub 2020 Feb 12. PubMed PMID: 32151335.</p>                                                                                                                                                                                                                          | Included            |

|                                                                                                                                                                                                                                                                                                                                                          |                                  |
|----------------------------------------------------------------------------------------------------------------------------------------------------------------------------------------------------------------------------------------------------------------------------------------------------------------------------------------------------------|----------------------------------|
| <p>86: Qiao J. What are the risks of COVID-19 infection in pregnant women? <i>Lancet</i>. 2020 Mar 7;395(10226):760-762. doi: 10.1016/S0140-6736(20)30365-2. Epub 2020 Feb 12. PubMed PMID: 32151334.</p>                                                                                                                                                | No original article              |
| <p>87: De Luca D. Managing neonates with respiratory failure due to SARS-CoV-2. <i>Lancet Child Adolesc Health</i>. 2020 Apr;4(4):e8. doi: 10.1016/S2352-4642(20)30073-0. Epub 2020 Mar 6. PubMed PMID: 32151320.</p>                                                                                                                                    | No original article              |
| <p>88: Wang J, Shi Y. Managing neonates with respiratory failure due to SARS-CoV-2 - Authors' reply. <i>Lancet Child Adolesc Health</i>. 2020 Apr;4(4):e9. doi: 10.1016/S2352-4642(20)30072-9. Epub 2020 Mar 6. PubMed PMID: 32151318.</p>                                                                                                               | No original article              |
| <p>89: Tang A, Tong ZD, Wang HL, Dai YX, Li KF, Liu JN, Wu WJ, Yuan C, Yu ML, Li P, Yan JB. Detection of Novel Coronavirus by RT-PCR in Stool Specimen from Asymptomatic Child, China. <i>Emerg Infect Dis</i>. 2020 Jun 17;26(6). doi: 10.3201/eid2606.200301. [Epub ahead of print] PubMed PMID: 32150527.</p>                                         | No appropriate population sample |
| <p>90: Chen Z, Xiong H, Li JX, Li H, Tao F, Yang YT, Wu B, Tang W, Teng JX, Fu Q, Yang L. [COVID-19 with post-chemotherapy agranulocytosis in childhood acute leukemia: a case report]. <i>Zhonghua Xue Ye Xue Za Zhi</i>. 2020 Mar 9;41(0):E004. doi: 10.3760/cma.j.issn.0253-2727.2020.0004. [Epub ahead of print] Chinese. PubMed PMID: 32149486.</p> | No appropriate population sample |
| <p>91: Ko WC, Rolain JM, Lee NY, Chen PL, Huang CT, Lee PI, Hsueh PR. Arguments in favour of remdesivir for treating SARS-CoV-2 infections. <i>Int J Antimicrob Agents</i>. 2020 Mar 6:105933. doi: 10.1016/j.ijantimicag.2020.105933. [Epub ahead of print] PubMed PMID: 32147516.</p>                                                                  | No appropriate population sample |

|                                                                                                                                                                                                                                                                                                                                                         |                                         |
|---------------------------------------------------------------------------------------------------------------------------------------------------------------------------------------------------------------------------------------------------------------------------------------------------------------------------------------------------------|-----------------------------------------|
| <p>92: Lee PI, Hu YL, Chen PY, Huang YC, Hsueh PR. Are children less susceptible to COVID-19? <i>J Microbiol Immunol Infect.</i> 2020 Feb 25. pii: S1684-1182(20)30039-6. doi: 10.1016/j.jmii.2020.02.011. [Epub ahead of print] PubMed PMID: 32147409.</p>                                                                                             | <p>No appropriate population sample</p> |
| <p>93: Hu Z, Song C, Xu C, Jin G, Chen Y, Xu X, Ma H, Chen W, Lin Y, Zheng Y, Wang J, Hu Z, Yi Y, Shen H. Clinical characteristics of 24 asymptomatic infections with COVID-19 screened among close contacts in Nanjing, China. <i>Sci China Life Sci.</i> 2020 Mar 4. doi: 10.1007/s11427-020-1661-4. [Epub ahead of print] PubMed PMID: 32146694.</p> | <p>No appropriate population sample</p> |
| <p>94: Porcheddu R, Serra C, Kelvin D, Kelvin N, Rubino S. Similarity in Case Fatality Rates (CFR) of COVID-19/SARS-COV-2 in Italy and China. <i>J Infect Dev Ctries.</i> 2020 Feb 29;14(2):125-128. doi: 10.3855/jidc.12600. PubMed PMID: 32146445</p>                                                                                                 | <p>No appropriate population sample</p> |
| <p>95: Tao FB. [Healing the schism between public health and medicine, promoting the integration of prevention and treatment]. <i>Zhonghua Yu Fang Yi Xue Za Zhi.</i> 2020 Mar 8;54(0):E024. doi: 10.3760/cma.j.cn112150-20200304-00246. [Epub ahead of print] Chinese. PubMed PMID: 32145718.</p>                                                      | <p>No appropriate outcome</p>           |
| <p>96: Zhang L, Jiang Y, Wei M, Cheng BH, Zhou XC, Li J, Tian JH, Dong L, Hu RH. [Analysis of the pregnancy outcomes in pregnant women with COVID-19 in Hubei Province]. <i>Zhonghua Fu Chan Ke Za Zhi.</i> 2020 Mar 7;55(0):E009. doi: 10.3760/cma.j.cn112141-20200218-00111. [Epub ahead of print] Chinese. PubMed PMID: 32145714.</p>                | <p>Overlapping data</p>                 |
| <p>97: He Y, Wang Z, Li F, Shi Y. Public health might be endangered by possible prolonged discharge of SARS-CoV-2 in stool. <i>J Infect.</i> 2020 Mar 5. pii: S0163-4453(20)30111-0. doi: 10.1016/j.jinf.2020.02.031. [Epub ahead of print] PubMed PMID: 32145217.</p>                                                                                  | <p>No appropriate population sample</p> |

|                                                                                                                                                                                                                                                                                                                                                                         |                                         |
|-------------------------------------------------------------------------------------------------------------------------------------------------------------------------------------------------------------------------------------------------------------------------------------------------------------------------------------------------------------------------|-----------------------------------------|
| <p>98: Liu Y, Chen H, Tang K, Guo Y. Clinical manifestations and outcome of SARS-CoV-2 infection during pregnancy. <i>J Infect.</i> 2020 Mar 4. pii: S0163-4453(20)30109-2. doi: 10.1016/j.jinf.2020.02.028. [Epub ahead of print] PubMed PMID: 32145216.</p>                                                                                                           | <p>Included</p>                         |
| <p>99: Wang G, Zhang Y, Zhao J, Zhang J, Jiang F. Mitigate the effects of home confinement on children during the COVID-19 outbreak. <i>Lancet.</i> 2020 Mar 21;395(10228):945-947. doi: 10.1016/S0140-6736(20)30547-X. Epub 2020 Mar 4. PubMed PMID: 32145186.</p>                                                                                                     | <p>No appropriate population sample</p> |
| <p>100: Lin M, Beliaevsky A, Katz K, Powis JE, Ng W, Williams V, Science M, Groves H, Muller MP, Vaisman A, Hota S, Johnstone J, Leis JA. What can early Canadian experience screening for COVID-19 teach us about how to prepare for a pandemic? <i>CMAJ.</i> 2020 Mar 6. pii: cmaj.200305. doi: 10.1503/cmaj.200305. [Epub ahead of print] PubMed PMID: 32144097.</p> | <p>No appropriate outcome</p>           |
| <p>101: Yang Y, Peng F, Wang R, Guan K, Jiang T, Xu G, Sun J, Chang C. The deadly coronaviruses: The 2003 SARS pandemic and the 2020 novel coronavirus epidemic in China. <i>J Autoimmun.</i> 2020 Mar 3:102434. doi: 10.1016/j.jaut.2020.102434. [Epub ahead of print] Review. PubMed PMID: 32143990.</p>                                                              | <p>No appropriate outcome</p>           |
| <p>102: Lee IK, Wang CC, Lin MC, Kung CT, Lan KC, Lee CT. Effective strategies to prevent coronavirus disease-2019 (COVID-19) outbreak in hospital. <i>J Hosp Infect.</i> 2020 Mar 3. pii: S0195-6701(20)30098-0. doi: 10.1016/j.jhin.2020.02.022. [Epub ahead of print] PubMed PMID: 32142886.</p>                                                                     | <p>No appropriate population sample</p> |
| <p>103: Favre G, Pomar L, Qi X, Nielsen-Saines K, Musso D, Baud D. Guidelines for pregnant women with suspected SARS-CoV-2 infection. <i>Lancet Infect Dis.</i> 2020 Mar 3. pii: S1473-3099(20)30157-2. doi: 10.1016/S1473-3099(20)30157-2. [Epub ahead of print] PubMed PMID: 32142639.</p>                                                                            | <p>No original article</p>              |

|                                                                                                                                                                                                                                                                                                                                                                   |                                         |
|-------------------------------------------------------------------------------------------------------------------------------------------------------------------------------------------------------------------------------------------------------------------------------------------------------------------------------------------------------------------|-----------------------------------------|
| <p>104: Han Y, Yang H. The transmission and diagnosis of 2019 novel coronavirus infection disease (COVID-19): A Chinese perspective. <i>J Med Virol.</i> 2020 Mar 6. doi: 10.1002/jmv.25749. [Epub ahead of print] PubMed PMID: 32141619.</p>                                                                                                                     | <p>No appropriate outcome</p>           |
| <p>105: Liang H, Acharya G. Novel corona virus disease (COVID-19) in pregnancy: What clinical recommendations to follow? <i>Acta Obstet Gynecol Scand.</i> 2020 Apr;99(4):439-442. doi: 10.1111/aogs.13836. Epub 2020 Mar 5. PubMed PMID: 32141062</p>                                                                                                            | <p>No original article</p>              |
| <p>106: Cao Q, Chen YC, Chen CL, Chiu CH. SARS-CoV-2 infection in children: Transmission dynamics and clinical characteristics. <i>J Formos Med Assoc.</i> 2020 Mar;119(3):670-673. doi: 10.1016/j.jfma.2020.02.009. Epub 2020 Mar 2. PubMed PMID: 32139299.</p>                                                                                                  | <p>No original article</p>              |
| <p>107: Zhang YH, Lin DJ, Xiao MF, Wang JC, Wei Y, Lei ZX, Zeng ZQ, Li L, Li HA, Xiang W. [2019 novel coronavirus infection in a three-month-old baby]. <i>Zhonghua Er Ke Za Zhi.</i> 2020 Mar 2;58(3):182-184. doi: 10.3760/cma.j.issn.0578-1310.2020.03.004. Chinese. PubMed PMID: 32135587.</p>                                                                | <p>No appropriate population sample</p> |
| <p>108: Chen F, Liu ZS, Zhang FR, Xiong RH, Chen Y, Cheng XF, Wang WY, Ren J. [First case of severe childhood novel coronavirus pneumonia in China]. <i>Zhonghua Er Ke Za Zhi.</i> 2020 Mar 2;58(3):179-182. doi: 10.3760/cma.j.issn.0578-1310.2020.03.003. Chinese. PubMed PMID: 32135586.</p>                                                                   | <p>No appropriate population sample</p> |
| <p>109: Subspecialty Group of Gastroenterology, the Society of Pediatrics, Chinese Medical Association. [Prevention and control program on 2019 novel coronavirus infection in children's digestive endoscopy center]. <i>Zhonghua Er Ke Za Zhi.</i> 2020 Mar 2;58(3):175-178. doi: 10.3760/cma.j.issn.0578-1310.2020.03.002. Chinese. PubMed PMID: 32135585.</p> | <p>No appropriate population sample</p> |

|                                                                                                                                                                                                                                                                                                                                                                                          |                                  |
|------------------------------------------------------------------------------------------------------------------------------------------------------------------------------------------------------------------------------------------------------------------------------------------------------------------------------------------------------------------------------------------|----------------------------------|
| <p>110: Society of Pediatrics, Chinese Medical Association; Editorial Board, Chinese Journal of Pediatrics. [Recommendations for the diagnosis, prevention and control of the 2019 novel coronavirus infection in children (first interim edition)]. Zhonghua Er Ke Za Zhi. 2020 Mar 2;58(3):169-174. doi: 10.3760/cma.j.issn.0578-1310.2020.03.001. Chinese. PubMed PMID: 32135584.</p> | No original article              |
| <p>111: Li Y, Zhao R, Zheng S, Chen X, Wang J, Sheng X, Zhou J, Cai H, Fang Q, Yu F, Fan J, Xu K, Chen Y, Sheng J. Lack of Vertical Transmission of Severe Acute Respiratory Syndrome Coronavirus 2, China. Emerg Infect Dis. 2020 Jun 17;26(6). doi: 10.3201/eid2606.200287. [Epub ahead of print] PubMed PMID: 32134381.</p>                                                           | Included                         |
| <p>112: Xia W, Shao J, Guo Y, Peng X, Li Z, Hu D. Clinical and CT features in pediatric patients with COVID-19 infection: Different points from adults. Pediatr Pulmonol. 2020 Mar 5. doi: 10.1002/ppul.24718. [Epub ahead of print] PubMed PMID: 32134205</p>                                                                                                                           | No appropriate outcome           |
| <p>113: Wang Y, Wang Y, Chen Y, Qin Q. Unique epidemiological and clinical features of the emerging 2019 novel coronavirus pneumonia (COVID-19) implicate special control measures. J Med Virol. 2020 Mar 5. doi: 10.1002/jmv.25748. [Epub ahead of print] Review. PubMed PMID: 32134116.</p>                                                                                            | No appropriate outcome           |
| <p>114: Liu W, Zhu HL, Duan Y. Effective Chemicals against Novel Coronavirus (COVID-19) in China. Curr Top Med Chem. 2020 Mar 5. doi: 10.2174/1568026620999200305145032. [Epub ahead of print] PubMed PMID: 32133962.</p>                                                                                                                                                                | No appropriate outcome           |
| <p>115: Chua M, Lee J, Sulaiman S, Tan HK. From the frontline of COVID-19 - How prepared are we as obstetricians: a commentary. BJOG. 2020 Mar 4. doi: 10.1111/1471-0528.16192. [Epub ahead of print] PubMed PMID: 32131142.</p>                                                                                                                                                         | No appropriate population sample |

|                                                                                                                                                                                                                                                                                                                                                                                                                            |                                         |
|----------------------------------------------------------------------------------------------------------------------------------------------------------------------------------------------------------------------------------------------------------------------------------------------------------------------------------------------------------------------------------------------------------------------------|-----------------------------------------|
| <p>116: Peng X, Xu X, Li Y, Cheng L, Zhou X, Ren B. Transmission routes of 2019-nCoV and controls in dental practice. <i>Int J Oral Sci.</i> 2020 Mar 3;12(1):9. doi: 10.1038/s41368-020-0075-9. Review. PubMed PMID: 32127517; PubMed Central PMCID: PMC7054527.</p>                                                                                                                                                      | <p>No appropriate population sample</p> |
| <p>117: Rodriguez-Morales AJ, Gallego V, Escalera-Antezana JP, Méndez CA, Zambrano LI, Franco-Paredes C, Suárez JA, Rodriguez-Enciso HD, Balbin-Ramon GJ, Savio-Larriera E, Risquez A, Cimerman S. COVID-19 in Latin America: The implications of the first confirmed case in Brazil. <i>Travel Med Infect Dis.</i> 2020 Feb 29;101613. doi: 10.1016/j.tmaid.2020.101613. [Epub ahead of print] PubMed PMID: 32126292.</p> | <p>No appropriate population sample</p> |
| <p>118: COVID-19 National Incident Room Surveillance Team. COVID-19, Australia: Epidemiology Report 5 (Reporting week ending 19:00 AEDT 29 February 2020). <i>Commun Dis Intell</i> (2018). 2020 Mar 4;44. doi: 10.33321/cdi.2020.44.20. PubMed PMID: 32126197</p>                                                                                                                                                         | <p>No appropriate outcome</p>           |
| <p>119: Wang CJ, Ng CY, Brook RH. Response to COVID-19 in Taiwan: Big Data Analytics, New Technology, and Proactive Testing. <i>JAMA.</i> 2020 Mar 3. doi: 10.1001/jama.2020.3151. [Epub ahead of print] PubMed PMID: 32125371.</p>                                                                                                                                                                                        | <p>No appropriate population sample</p> |
| <p>120: Amodio E, Vitale F, Cimino L, Casuccio A, Tramuto F. Outbreak of Novel Coronavirus (SARS-Cov-2): First Evidences From International Scientific Literature and Pending Questions. <i>Healthcare (Basel).</i> 2020 Feb 27;8(1). pii: E51. doi: 10.3390/healthcare8010051. PubMed PMID: 32120965.</p>                                                                                                                 | <p>No appropriate population sample</p> |
| <p>121: Wang X, Zhou Z, Zhang J, Zhu F, Tang Y, Shen X. A case of 2019 Novel Coronavirus in a pregnant woman with preterm delivery. <i>Clin Infect Dis.</i> 2020 Feb 28. pii: ciaa200. doi: 10.1093/cid/ciaa200. [Epub ahead of print] PubMed PMID: 32119083</p>                                                                                                                                                           | <p>Included</p>                         |



|                                                                                                                                                                                                                                                                                                                                                                                                                                                                                                         |                                  |
|---------------------------------------------------------------------------------------------------------------------------------------------------------------------------------------------------------------------------------------------------------------------------------------------------------------------------------------------------------------------------------------------------------------------------------------------------------------------------------------------------------|----------------------------------|
| <p>122: Wang D, Ju XL, Xie F, Lu Y, Li FY, Huang HH, Fang XL, Li YJ, Wang JY, Yi B, Yue JX, Wang J, Wang LX, Li B, Wang Y, Qiu BP, Zhou ZY, Li KL, Sun JH, Liu XG, Li GD, Wang YJ, Cao AH, Chen YN. [Clinical analysis of 31 cases of 2019 novel coronavirus infection in children from six provinces (autonomous region) of northern China]. <i>Zhonghua Er Ke Za Zhi</i>. 2020 Mar 2;58(4):E011. doi: 10.3760/cma.j.cn112140-20200225-00138. [Epub ahead of print] Chinese. PubMedPMID: 32118389.</p> | No appropriate population sample |
| <p>123: Henwood AF. Coronavirus disinfection in histopathology. <i>J Histotechnol</i>. 2020 Mar 1:1-3. doi: 10.1080/01478885.2020.1734718. [Epub ahead of print] PubMed PMID: 32116147</p>                                                                                                                                                                                                                                                                                                              | No appropriate outcome           |
| <p>124: Lu Q, Shi Y. Coronavirus disease (COVID-19) and neonate: What neonatologist need to know. <i>J Med Virol</i>. 2020 Mar 1. doi: 10.1002/jmv.25740. [Epub ahead of print] Review. PubMed PMID: 32115733.</p>                                                                                                                                                                                                                                                                                      | No original article              |
| <p>125: Chen S, Huang B, Luo DJ, Li X, Yang F, Zhao Y, Nie X, Huang BX. [Pregnant women with new coronavirus infection: a clinical characteristics and placental pathological analysis of three cases]. <i>Zhonghua Bing Li Xue Za Zhi</i>. 2020 Mar 1;49(0):E005. doi: 10.3760/cma.j.cn112151-20200225-00138. [Epub ahead of print] Chinese. PubMed PMID: 32114744.</p>                                                                                                                                | Included                         |
| <p>126: Rothan HA, Byrareddy SN. The epidemiology and pathogenesis of coronavirus disease (COVID-19) outbreak. <i>J Autoimmun</i>. 2020 Feb 26:102433. doi: 10.1016/j.jaut.2020.102433. [Epub ahead of print] Review. PubMed PMID: 32113704.</p>                                                                                                                                                                                                                                                        | No appropriate outcome           |
| <p>127: Chen L, Xiong J, Bao L, Shi Y. Convalescent plasma as a potential therapy for COVID-19. <i>Lancet Infect Dis</i>. 2020 Feb 27. pii: S1473-3099(20)30141-9. doi: 10.1016/S1473-3099(20)30141-9. [Epub ahead of print] PubMed PMID: 32113510.</p>                                                                                                                                                                                                                                                 | No appropriate population sample |

|                                                                                                                                                                                                                                                                                                                                                                                                                   |                                         |
|-------------------------------------------------------------------------------------------------------------------------------------------------------------------------------------------------------------------------------------------------------------------------------------------------------------------------------------------------------------------------------------------------------------------|-----------------------------------------|
| <p>128: Ma XL, Chen Z, Zhu JJ, Shen XX, Wu MY, Shi LP, Du LZ, Fu JF, Shu Q. Management strategies of neonatal jaundice during the coronavirus disease 2019 outbreak. <i>World J Pediatr.</i> 2020 Feb 28. doi: 10.1007/s12519-020-00347-3. [Epub ahead of print] Review. PubMed PMID: 32112336.</p>                                                                                                               | <p>No appropriate population sample</p> |
| <p>129: Kam KQ, Yung CF, Cui L, Lin Tzer Pin R, Mak TM, Maiwald M, Li J, Chong CY, Nadua K, Tan NWH, Thoon KC. A Well Infant with Coronavirus Disease 2019 (COVID-19) with High Viral Load. <i>Clin Infect Dis.</i> 2020 Feb 28. pii: ciaa201. doi: 10.1093/cid/ciaa201. [Epub ahead of print] PubMed PMID: 32112082.</p>                                                                                         | <p>No appropriate population sample</p> |
| <p>130: Cai J, Xu J, Lin D, Yang Z, Xu L, Qu Z, Zhang Y, Zhang H, Jia R, Liu P, Wang X, Ge Y, Xia A, Tian H, Chang H, Wang C, Li J, Wang J, Zeng M. A Case Series of children with 2019 novel coronavirus infection: clinical and epidemiological features. <i>Clin Infect Dis.</i> 2020 Feb 28. pii: ciaa198. doi: 10.1093/cid/ciaa198. [Epub ahead of print] PubMed PMID: 32112072.</p>                         | <p>No appropriate population sample</p> |
| <p>131: Huang WH, Teng LC, Yeh TK, Chen YJ, Lo WJ, Wu MJ, Chin CS, Tsan YT, Lin TC, Chai JW, Lin CF, Tseng CH, Liu CW, Wu CM, Chen PY, Shi ZY, Liu PY. 2019 novel coronavirus disease (COVID-19) in Taiwan: Reports of two cases from Wuhan, China. <i>J Microbiol Immunol Infect.</i> 2020 Feb 19. pii: S1684-1182(20)30037-2. doi: 10.1016/j.jmii.2020.02.009. [Epub ahead of print] PubMed PMID: 32111449.</p> | <p>No appropriate population sample</p> |
| <p>132: Liu M, Xu HL, Yuan M, Liu ZR, Wu XY, Zhang Y, Ma LY, Gong L, Gan H, Zong WW, Tao SM, Liu Q, Du YN, Tao FB. [Analysis on epidemic situation and spatiotemporal changes of COVID-19 in Anhui]. <i>Zhonghua Yu Fang Yi Xue Za Zhi.</i> 2020 Feb 27;54(0):E019. doi: 10.3760/cma.j.cn112150-20200221-00150. [Epub ahead of print] Chinese. PubMed PMID: 32107910.</p>                                         | <p>No appropriate outcome</p>           |

|                                                                                                                                                                                                                                                                                                                                                                                                                 |                                         |
|-----------------------------------------------------------------------------------------------------------------------------------------------------------------------------------------------------------------------------------------------------------------------------------------------------------------------------------------------------------------------------------------------------------------|-----------------------------------------|
| <p>133: Rasmussen SA, Smulian JC, Lednický JA, Wen TS, Jamieson DJ. Coronavirus disease 2019 (COVID 19) and pregnancy: what obstetricians need to know. <i>Am J Obstet Gynecol.</i> 2020 Feb 24. pii: S0002-9378(20)30197-6. doi: 10.1016/j.ajog.2020.02.017. [Epub ahead of print] Review. PubMed PMID: 32105680.</p>                                                                                          | <p>No original article</p>              |
| <p>134: Cai JH, Wang XS, Ge YL, Xia AM, Chang HL, Tian H, Zhu YX, Wang QR, Zeng JS. [First case of 2019 novel coronavirus infection in children in Shanghai]. <i>Zhonghua Er Ke Za Zhi.</i> 2020 Feb 2;58(2):86-87. doi: 10.3760/cma.j.issn.0578-1310.2020.02.002. Chinese. PubMed PMID: 32102141.</p>                                                                                                          | <p>No appropriate population sample</p> |
| <p>135: Fang F, Luo XP. [Facing the pandemic of 2019 novel coronavirus infections: the pediatric perspectives]. <i>Zhonghua Er Ke Za Zhi.</i> 2020 Feb 2;58(2):81-85. doi: 10.3760/cma.j.issn.0578-1310.2020.02.001. Chinese. PubMed PMID: 32102140.</p>                                                                                                                                                        | <p>No appropriate population sample</p> |
| <p>136: Lai A, Bergna A, Acciarri C, Galli M, Zehender G. Early phylogenetic estimate of the effective reproduction number of SARS-CoV-2. <i>J Med Virol.</i> 2020 Feb 25. doi: 10.1002/jmv.25723. [Epub ahead of print] PubMed PMID: 32096566.</p>                                                                                                                                                             | <p>No appropriate population sample</p> |
| <p>137: Ralph R, Lew J, Zeng T, Francis M, Xue B, Roux M, Toloue Ostadgavahi A, Rubino S, Dawe NJ, Al-Ahdal MN, Kelvin DJ, Richardson CD, Kindrachuk J, Falzarano D, Kelvin AA. 2019-nCoV (Wuhan virus), a novel Coronavirus: human-to-human transmission, travel-related cases, and vaccine readiness. <i>J Infect Dev Ctries.</i> 2020 Jan 31;14(1):3-17. doi: 10.3855/jidc.12425. PubMed PMID: 32088679.</p> | <p>No appropriate population sample</p> |
| <p>138: Gilbert M, Pullano G, Pinotti F, Valdano E, Poletto C, Boëlle PY, D'Ortenzio E, Yazdanpanah Y, Eholie SP, Altmann M, Gutierrez B, Kraemer MUG, Colizza V. Preparedness and vulnerability of African countries against importations of COVID-19: a modelling study. <i>Lancet.</i> 2020 Mar 14;395(10227):871-877. doi: 10.1016/S0140-</p>                                                               | <p>No appropriate population sample</p> |

|                                                                                                                                                                                                                                                                                                                                                                                                        |                                  |
|--------------------------------------------------------------------------------------------------------------------------------------------------------------------------------------------------------------------------------------------------------------------------------------------------------------------------------------------------------------------------------------------------------|----------------------------------|
| 6736(20)30411-6. Epub 2020 Feb 20. PubMed PMID: 32087820.                                                                                                                                                                                                                                                                                                                                              |                                  |
| 139: Catton H. Global challenges in health and health care for nurses and midwives everywhere. <i>Int Nurs Rev.</i> 2020 Mar;67(1):4-6. doi: 10.1111/inr.12578. PubMed PMID: 32083728.                                                                                                                                                                                                                 | No appropriate outcome           |
| 140: Kim JY, Ko JH, Kim Y, Kim YJ, Kim JM, Chung YS, Kim HM, Han MG, Kim SY, Chin BS. Viral Load Kinetics of SARS-CoV-2 Infection in First Two Patients in Korea. <i>J Korean Med Sci.</i> 2020 Feb 24;35(7):e86. doi: 10.3346/jkms.2020.35.e86. PubMed PMID: 32080991; PubMed Central PMCID: PMC7036338.                                                                                              | No appropriate population sample |
| 141: Xu XW, Wu XX, Jiang XG, Xu KJ, Ying LJ, Ma CL, Li SB, Wang HY, Zhang S, Gao HN, Sheng JF, Cai HL, Qiu YQ, Li LJ. Clinical findings in a group of patients infected with the 2019 novel coronavirus (SARS-Cov-2) outside of Wuhan, China: retrospective case series. <i>BMJ.</i> 2020 Feb 19;368:m606. doi: 10.1136/bmj.m606. Erratum in: <i>BMJ.</i> 2020 Feb 27;368:m792. PubMed PMID: 32075786. | No appropriate population sample |
| 142: Han W, Quan B, Guo Y, Zhang J, Lu Y, Feng G, Wu Q, Fang F, Cheng L, Jiao N, Li X, Chen Q. The course of clinical diagnosis and treatment of a case infected with coronavirus disease 2019. <i>J Med Virol.</i> 2020 May;92(5):461-463. doi: 10.1002/jmv.25711. Epub 2020 Mar 1. PubMed PMID: 32073161.                                                                                            | No appropriate population sample |
| 143: Cheng ZJ, Shan J. 2019 Novel coronavirus: where we are and what we know. <i>Infection.</i> 2020 Feb 18. doi: 10.1007/s15010-020-01401-y. [Epub ahead of print] Review. PubMed PMID: 32072569.                                                                                                                                                                                                     | No original article              |

|                                                                                                                                                                                                                                                                                                                                                                                                       |                                         |
|-------------------------------------------------------------------------------------------------------------------------------------------------------------------------------------------------------------------------------------------------------------------------------------------------------------------------------------------------------------------------------------------------------|-----------------------------------------|
| <p>144: Zeng LK, Tao XW, Yuan WH, Wang J, Liu X, Liu ZS. [First case of neonate infected with novel coronavirus pneumonia in China]. <i>Zhonghua Er Ke Za Zhi</i>. 2020 Feb 17;58(0):E009. doi: 10.3760/cma.j.issn.0578-1310.2020.0009. [Epub ahead of print] Chinese. PubMed PMID: 32065520.</p>                                                                                                     | <p>Included</p>                         |
| <p>145: Wang XF, Yuan J, Zheng YJ, Chen J, Bao YM, Wang YR, Wang LF, Li H, Zeng JX, Zhang YH, Liu YX, Liu L. [Retracted: Clinical and epidemiological characteristics of 34 children with 2019 novel coronavirus infection in Shenzhen]. <i>Zhonghua Er Ke Za Zhi</i>. 2020 Feb 17;58(0):E008. doi: 10.3760/cma.j.issn.0578-1310.2020.0008. [Epub ahead of print] Chinese. PubMed PMID: 32062875.</p> | <p>No appropriate population sample</p> |
| <p>146: Feng K, Yun YX, Wang XF, Yang GD, Zheng YJ, Lin CM, Wang LF. [Analysis of CT features of 15 Children with 2019 novel coronavirus infection]. <i>Zhonghua Er Ke Za Zhi</i>. 2020 Feb 16;58(0):E007. doi: 10.3760/cma.j.issn.0578-1310.2020.0007. [Epub ahead of print] Chinese. PubMed PMID: 32061200.</p>                                                                                     | <p>No appropriate population sample</p> |
| <p>147: Wei M, Yuan J, Liu Y, Fu T, Yu X, Zhang ZJ. Novel Coronavirus Infection in Hospitalized Infants Under 1 Year of Age in China. <i>JAMA</i>. 2020 Feb 14. doi: 10.1001/jama.2020.2131. [Epub ahead of print] PubMed PMID: 32058570; PubMed Central PMCID: PMC7042807.</p>                                                                                                                       | <p>No appropriate population sample</p> |
| <p>148: Jiang X, Rayner S, Luo MH. Does SARS-CoV-2 has a longer incubation period than SARS and MERS? <i>J Med Virol</i>. 2020 May;92(5):476-478. doi: 10.1002/jmv.25708. Epub 2020 Feb 24. PubMed PMID: 32056235.</p>                                                                                                                                                                                | <p>No appropriate population sample</p> |
| <p>149: Bajema KL, Oster AM, McGovern OL, Lindstrom S, Stenger MR, Anderson TC, Isenhour C, Clarke KR, Evans ME, Chu VT, Biggs HM, Kirking HL, Gerber SI, Hall AJ, Fry AM, Oliver SE; 2019-nCoV Persons Under Investigation Team; 2019-CoV Persons Under Investigation Team. Persons Evaluated for 2019 Novel Coronavirus - United States,</p>                                                        | <p>No appropriate population sample</p> |

|                                                                                                                                                                                                                                                                                                                                                                                                         |                                  |
|---------------------------------------------------------------------------------------------------------------------------------------------------------------------------------------------------------------------------------------------------------------------------------------------------------------------------------------------------------------------------------------------------------|----------------------------------|
| <p>January 2020. MMWR Morb Mortal Wkly Rep. 2020 Feb 14;69(6):166-170. doi: 10.15585/mmwr.mm6906e1. PubMed PMID: 32053579; PubMedCentral PMCID: PMC7017962.</p>                                                                                                                                                                                                                                         |                                  |
| <p>150: Zhang L, Liu Y. Potential interventions for novel coronavirus in China: A systematic review. J Med Virol. 2020 May;92(5):479-490. doi: 10.1002/jmv.25707. Epub 2020 Mar 3. Review. PubMed PMID: 32052466.</p>                                                                                                                                                                                   | No original article              |
| <p>151: Pediatric Branch of Hubei Medical Association; Pediatric Branch of Wuhan Medical Association; Pediatric Medical Quality Control Center of Hubei. [Recommendation for the diagnosis and treatment of novel coronavirus infection in children in Hubei (Trial version 1)]. Zhongguo Dang Dai Er Ke Za Zhi. 2020 Feb;22(2):96-99. Chinese. PubMed PMID: 32051073.</p>                              | No appropriate population sample |
| <p>152: Pediatric Committee, Medical Association of Chinese People's Liberation Army; Editorial Committee of Chinese Journal of Contemporary Pediatrics. [Emergency response plan for the neonatal intensive care unit during epidemic of 2019 novel coronavirus]. Zhongguo Dang Dai Er Ke Za Zhi. 2020 Feb;22(2):91-95. Chinese. PubMed PMID: 32051072.</p>                                            | No appropriate outcome           |
| <p>153: Working Group for the Prevention and Control of Neonatal 2019-nCoV Infection in the Perinatal Period of the Editorial Committee of Chinese Journal of Contemporary Pediatrics. [Perinatal and neonatal management plan for prevention and control of 2019 novel coronavirus infection (1st Edition)]. Zhongguo Dang Dai Er Ke Za Zhi. 2020 Feb;22(2):87-90. Chinese. PubMed PMID: 32051071.</p> | No original article              |
| <p>154: Schwartz DA, Graham AL. Potential Maternal and Infant Outcomes from (Wuhan) Coronavirus 2019-nCoV Infecting Pregnant Women: Lessons from SARS, MERS, and Other Human Coronavirus Infections.</p>                                                                                                                                                                                                | No original article              |

|                                                                                                                                                                                                                                                                                                                                                                                                                                       |                                         |
|---------------------------------------------------------------------------------------------------------------------------------------------------------------------------------------------------------------------------------------------------------------------------------------------------------------------------------------------------------------------------------------------------------------------------------------|-----------------------------------------|
| <p>Viruses. 2020 Feb 10;12(2). pii: E194. doi: 10.3390/v12020194. PubMed PMID: 32050635; PubMed Central PMCID: PMC7077337.</p>                                                                                                                                                                                                                                                                                                        |                                         |
| <p>155: Liu Y, Yang Y, Zhang C, Huang F, Wang F, Yuan J, Wang Z, Li J, Li J, Feng C, Zhang Z, Wang L, Peng L, Chen L, Qin Y, Zhao D, Tan S, Yin L, Xu J, Zhou C, Jiang C, Liu L. Clinical and biochemical indexes from 2019-nCoV infected patients linked to viral loads and lung injury. <i>Sci China Life Sci.</i> 2020 Mar;63(3):364-374. doi: 10.1007/s11427-020-1643-8. Epub 2020 Feb 9. PubMed PMID: 32048163</p>               | <p>No appropriate population sample</p> |
| <p>156: Chen F, Liu ZS, Zhang FR, Xiong RH, Chen Y, Cheng XF, Wang WY, Ren J. [First case of severe childhood novel coronavirus pneumonia in China]. <i>Zhonghua Er Ke Za Zhi.</i> 2020 Feb 11;58(0):E005. doi: 10.3760/cma.j.issn.0578-1310.2020.0005. [Epub ahead of print] Chinese. PubMed PMID: 32045966.</p>                                                                                                                     | <p>No appropriate population sample</p> |
| <p>157: Lee PI, Hsueh PR. Emerging threats from zoonotic coronaviruses—from SARS and MERS to 2019-nCoV. <i>J Microbiol Immunol Infect.</i> 2020 Feb 4. pii: S1684-1182(20)30011-6. doi: 10.1016/j.jmii.2020.02.001. [Epub ahead of print] PubMed PMID: 32035811.</p>                                                                                                                                                                  | <p>No appropriate outcome</p>           |
| <p>158: Favre G, Pomar L, Musso D, Baud D. 2019-nCoV epidemic: what about pregnancies? <i>Lancet.</i> 2020 Feb 22;395(10224):e40. doi: 10.1016/S0140-6736(20)30311-1. Epub 2020 Feb 6. PubMed PMID: 32035511.</p>                                                                                                                                                                                                                     | <p>No original article</p>              |
| <p>159: Shen K, Yang Y, Wang T, Zhao D, Jiang Y, Jin R, Zheng Y, Xu B, Xie Z, Lin L, Shang Y, Lu X, Shu S, Bai Y, Deng J, Lu M, Ye L, Wang X, Wang Y, Gao L; China National Clinical Research Center for Respiratory Diseases; National Center for Children's Health, Beijing, China; Group of Respiriology, Chinese Pediatric Society, Chinese Medical Association; Chinese Medical Doctor Association Committee on Respiriology</p> | <p>No original article</p>              |

|                                                                                                                                                                                                                                                                                                                                                                                                                                                                                                                                                                                                                                                                                                             |                                  |
|-------------------------------------------------------------------------------------------------------------------------------------------------------------------------------------------------------------------------------------------------------------------------------------------------------------------------------------------------------------------------------------------------------------------------------------------------------------------------------------------------------------------------------------------------------------------------------------------------------------------------------------------------------------------------------------------------------------|----------------------------------|
| <p>Pediatrics; China Medicine Education Association Committee on Pediatrics; Chinese Research Hospital Association Committee on Pediatrics; Chinese Non-government Medical Institutions Association Committee on Pediatrics; China Association of Traditional Chinese Medicine, Committee on Children's Health and Medicine Research; China News of Drug Information Association, Committee on Children's Safety Medication; Global Pediatric Pulmonology Alliance. Diagnosis, treatment, and prevention of 2019 novel coronavirus infection in children: experts' consensus statement. <i>World J Pediatr.</i> 2020 Feb 7. doi: 10.1007/s12519-020-00343-7. [Epub ahead of print] PubMed PMID:32034659</p> |                                  |
| <p>160: Chen ZM, Fu JF, Shu Q, Chen YH, Hua CZ, Li FB, Lin R, Tang LF, Wang TL, Wang W, Wang YS, Xu WZ, Yang ZH, Ye S, Yuan TM, Zhang CM, Zhang YY. Diagnosis and treatment recommendations for pediatric respiratory infection caused by the 2019 novel coronavirus. <i>World J Pediatr.</i> 2020 Feb 5. doi: 10.1007/s12519-020-00345-5. [Epub ahead of print] Review. PubMed PMID: 32026148.</p>                                                                                                                                                                                                                                                                                                         | No original article              |
| <p>162: Kanne JP. Chest CT Findings in 2019 Novel Coronavirus (2019-nCoV) Infections from Wuhan, China: Key Points for the Radiologist. <i>Radiology.</i> 2020 Apr;295(1):16-17. doi: 10.1148/radiol.2020200241. Epub 2020 Feb 4. PubMed PMID: 32017662</p>                                                                                                                                                                                                                                                                                                                                                                                                                                                 | No appropriate population sample |
| <p>163: Xu X, Chen P, Wang J, Feng J, Zhou H, Li X, Zhong W, Hao P. Evolution of the novel coronavirus from the ongoing Wuhan outbreak and modeling of its spike protein for risk of human transmission. <i>Sci China Life Sci.</i> 2020 Mar;63(3):457-460. doi: 10.1007/s11427-020-1637-5. Epub 2020 Jan 21. PubMed PMID: 32009228</p>                                                                                                                                                                                                                                                                                                                                                                     | No appropriate population sample |
| <p>164: Chan JF, Yuan S, Kok KH, To KK, Chu H, Yang J, Xing F, Liu J, Yip CC, Poon RW, Tsoi HW, Lo SK, Chan KH, Poon VK, Chan WM, Ip JD, Cai JP, Cheng VC, Chen H, Hui CK, Yuen KY. A familial cluster of pneumonia associated with the 2019 novel coronavirus indicating person-to-person transmission: a</p>                                                                                                                                                                                                                                                                                                                                                                                              | No appropriate population sample |



|                                                                                                                                                                                                                                                                                                                                                                     |                                  |
|---------------------------------------------------------------------------------------------------------------------------------------------------------------------------------------------------------------------------------------------------------------------------------------------------------------------------------------------------------------------|----------------------------------|
| study of a family cluster. Lancet. 2020 Feb 15;395(10223):514-523. doi: 10.1016/S0140-6736(20)30154-9. Epub 2020 Jan 24. PubMed PMID: 31986261.                                                                                                                                                                                                                     |                                  |
| 165: Zhang M, Li W, Zhou P, Liu D, Luo R, Jongkaewwattana A, He Q. Genetic manipulation of porcine deltacoronavirus reveals insights into NS6 and NS7 functions: a novel strategy for vaccine design. Emerg Microbes Infect. 2019 Dec 20;9(1):20-31. doi: 10.1080/22221751.2019.1701391. eCollection 2020. PubMed PMID: 31859605; PubMed Central PMCID: PMC6968670. | No appropriate outcome           |
| 166: Cao L, Wang TY, Chen HZ, Qian Y, Chen BW, Fang P, Sun YX, Zhu RN, Deng J, Zhao LQ, Mi J, Zhang T. [A preliminary investigation on the serological and epidemiological characteristics of severe acute respiratory syndrome in children]. Zhonghua Er Ke Za Zhi. 2004 Nov;42(11):840-4. Chinese. PubMed PMID: 15631713                                          | No appropriate population sample |

### 3. Other sources

|                                                                                                                                                                                                                                    |          |
|------------------------------------------------------------------------------------------------------------------------------------------------------------------------------------------------------------------------------------|----------|
| Song L, Xiao W, Ling K, Yao S and Chen X. Anesthetic Management for Emergent Cesarean Delivery in a Parturient with Recent Diagnosis of Coronavirus Disease 2019 (COVID-19): A Case Report. Transl Perioper & Pain Med 2020; 7 (3) | Included |
| Ferrazzi E, Frigerio L, Savasi V, Vergani P, Prefumo F, Barresi S. Mode of delivery and clinical findings in COVID-19-infected pregnant women in Northern Italy. (In press).                                                       | Included |
| Sara N. Iqbal, Rachael Overcash, Neggin Mokhtari, Haleema Saeed, Stacey Gold, Tamika Auguste, Muhammad-USman Mirza, Maria-Elena Ruiz, Joeffrey J. Chahine, Masashi Waga, Glenn Wortmann.                                           | Included |

|                                                                                                                                                                                                                                                                                                            |                  |
|------------------------------------------------------------------------------------------------------------------------------------------------------------------------------------------------------------------------------------------------------------------------------------------------------------|------------------|
| <p>An Uncomplicated Delivery in a Patient with Covid-19 in the United States. N Engl J Med. 2020 Apr 1 : NEJMc2007605. Published online 2020 Apr 1. doi: 10.1056/NEJMc2007605</p>                                                                                                                          |                  |
| <p>Breslin N, Baptiste C, Miller R, Fuchs K, Goffman D, Gyamfi-Bannerman C, D'Alton M, COVID-19 in pregnancy: early lessons, American Journal of Obstetrics &amp; Gynecology MFM (2020), doi: <a href="https://doi.org/10.1016/j.ajogmf.2020.100111">https://doi.org/10.1016/j.ajogmf.2020.100111</a>.</p> | Overlapping data |
| <p>Liu W, Wang Q, Zhang Q, Chen L, Chen J, Zhang B. et al. Coronavirus disease 2019 (COVID-19) during pregnancy: A case series. Preprints 2020;2020020373. Available from: <a href="https://www.preprints.org/manuscript/202002.0373/v1">https://www.preprints.org/manuscript/202002.0373/v1</a></p>       | Overlapping data |

**PRISMA Checklist**

| Section/topic                      | #  | Checklist item                                                                                                                                                                                                                                                                                              | Reported on page # |
|------------------------------------|----|-------------------------------------------------------------------------------------------------------------------------------------------------------------------------------------------------------------------------------------------------------------------------------------------------------------|--------------------|
| <b>TITLE</b>                       |    |                                                                                                                                                                                                                                                                                                             |                    |
| Title                              | 1  | Identify the report as a systematic review, meta-analysis, or both.                                                                                                                                                                                                                                         | 1                  |
| <b>ABSTRACT</b>                    |    |                                                                                                                                                                                                                                                                                                             |                    |
| Structured summary                 | 2  | Provide a structured summary including, as applicable: background; objectives; data sources; study eligibility criteria, participants, and interventions; study appraisal and synthesis methods; results; limitations; conclusions and implications of key findings; systematic review registration number. | 1                  |
| <b>INTRODUCTION</b>                |    |                                                                                                                                                                                                                                                                                                             |                    |
| Rationale                          | 3  | Describe the rationale for the review in the context of what is already known.                                                                                                                                                                                                                              | 1-2                |
| Objectives                         | 4  | Provide an explicit statement of questions being addressed with reference to participants, interventions, comparisons, outcomes, and study design (PICOS).                                                                                                                                                  | 1-2                |
| <b>METHODS</b>                     |    |                                                                                                                                                                                                                                                                                                             |                    |
| Protocol and registration          | 5  | Indicate if a review protocol exists, if and where it can be accessed (e.g., Web address), and, if available, provide registration information including registration number.                                                                                                                               | NA                 |
| Eligibility criteria               | 6  | Specify study characteristics (e.g., PICOS, length of follow-up) and report characteristics (e.g., years considered, language, publication status) used as criteria for eligibility, giving rationale.                                                                                                      | 3                  |
| Information sources                | 7  | Describe all information sources (e.g., databases with dates of coverage, contact with study authors to identify additional studies) in the search and date last searched.                                                                                                                                  | 2                  |
| Search                             | 8  | Present full electronic search strategy for at least one database, including any limits used, such that it could be repeated.                                                                                                                                                                               | 2                  |
| Study selection                    | 9  | State the process for selecting studies (i.e., screening, eligibility, included in systematic review, and, if applicable, included in the meta-analysis).                                                                                                                                                   | 3                  |
| Data collection process            | 10 | Describe method of data extraction from reports (e.g., piloted forms, independently, in duplicate) and any processes for obtaining and confirming data from investigators.                                                                                                                                  | 3                  |
| Data items                         | 11 | List and define all variables for which data were sought (e.g., PICOS, funding sources) and any assumptions and simplifications made.                                                                                                                                                                       | 3                  |
| Risk of bias in individual studies | 12 | Describe methods used for assessing risk of bias of individual studies (including specification of whether this was done at the study or outcome level), and how this information is to be used in any data synthesis.                                                                                      | 3                  |
| Summary measures                   | 13 | State the principal summary measures (e.g., risk ratio, difference in means).                                                                                                                                                                                                                               | NA                 |
| Synthesis of results               | 14 | Describe the methods of handling data and combining results of studies, if done, including measures of consistency (e.g., $I^2$ ) for each meta-analysis.                                                                                                                                                   | 3                  |
| Section/topic                      | #  | Checklist item                                                                                                                                                                                                                                                                                              | Reported on page # |
| Risk of bias across studies        | 15 | Specify any assessment of risk of bias that may affect the cumulative evidence (e.g., publication bias, selective reporting within studies).                                                                                                                                                                | NA                 |
| Additional analyses                | 16 | Describe methods of additional analyses (e.g., sensitivity or subgroup analyses, meta-regression), if done, indicating which were pre-specified.                                                                                                                                                            | NA                 |
| <b>RESULTS</b>                     |    |                                                                                                                                                                                                                                                                                                             |                    |
| Study selection                    | 17 | Give numbers of studies screened, assessed for eligibility, and included in the review, with reasons for exclusions at each stage, ideally with a flow diagram.                                                                                                                                             | 5                  |

|                               |    |                                                                                                                                                                                                          |       |
|-------------------------------|----|----------------------------------------------------------------------------------------------------------------------------------------------------------------------------------------------------------|-------|
| Study characteristics         | 18 | For each study, present characteristics for which data were extracted (e.g., study size, PICOS, follow-up period) and provide the citations.                                                             | 5-12  |
| Risk of bias within studies   | 19 | Present data on risk of bias of each study and, if available, any outcome level assessment (see item 12).                                                                                                | 12-14 |
| Results of individual studies | 20 | For all outcomes considered (benefits or harms), present, for each study: (a) simple summary data for each intervention group (b) effect estimates and confidence intervals, ideally with a forest plot. | 14-23 |
| Synthesis of results          | 21 | Present results of each meta-analysis done, including confidence intervals and measures of consistency.                                                                                                  | NA    |
| Risk of bias across studies   | 22 | Present results of any assessment of risk of bias across studies (see Item 15).                                                                                                                          | NA    |
| Additional analysis           | 23 | Give results of additional analyses, if done (e.g., sensitivity or subgroup analyses, meta-regression [see Item 16]).                                                                                    | NA    |
| <b>DISCUSSION</b>             |    |                                                                                                                                                                                                          |       |
| Summary of evidence           | 24 | Summarize the main findings including the strength of evidence for each main outcome; consider their relevance to key groups (e.g., healthcare providers, users, and policy makers).                     | 23-25 |
| Limitations                   | 25 | Discuss limitations at study and outcome level (e.g., risk of bias), and at review-level (e.g., incomplete retrieval of identified research, reporting bias).                                            | 25    |
| Conclusions                   | 26 | Provide a general interpretation of the results in the context of other evidence, and implications for future research.                                                                                  | 25    |
| <b>FUNDING</b>                |    |                                                                                                                                                                                                          |       |
| Funding                       | 27 | Describe sources of funding for the systematic review and other support (e.g., supply of data); role of funders for the systematic review.                                                               | 26    |
